# Supplementary material for: Design, Synthesis and Biological Evaluation of Novel Hydroxamic Acids Bearing Coumarin Moieties as Histone Deacetylase Inhibitors and Cytotoxic Agents
Source: Research Square preprint supplement (doi:10.21203/rs.3.rs-7484600/v1), 2025-09-17
Supplement: Supplementary file 1 [file 99a249c7365bafe3d581b8a6.docx]

Design, Synthesis and Biological Evaluation of Novel Hydroxamic Acids Bearing Coumarin Moieties as Histone Deacetylase Inhibitors and Cytotoxic Agents

**Tran-Duy Thanh1, Luu-Van Chinh2, Do-Thi Thao3, Thach-Lien Nguyen4, Hai Pham–The5 and Tran-Khac Vu1***

1Department of Chemical Engineering, School of Chemistry and Life Sciences, Hanoi University of Science and Technology, No 1, Dai Co Viet, Bach Mai–Hanoi, Vietnam

2Institute of Chemistry, Vietnam Academy of Science and Technology, 18–Hoang Quoc Viet–Nghia Do–Hanoi, Vietnam

3Institute of Biotechnology, Vietnam Academy of Science and Technology, 18–Hoang Quoc Viet–Nghia Do–Hanoi, Vietnam

4Hanoi University of Pharmacy, 13-15 Le Thanh Tong, Cua Nam, Hanoi, Vietnam

5University of Science and Technology of Hanoi (USTH), Vietnam Academy of Science and Technology, 18 Hoang Quoc Viet, Nghia Do, Hanoi, Vietnam

*****Corresponding author, e-mail: vu.trankhac@hust.edu.vn

**Table of contents**

1. Experimental section

2. Spectral data of compounds

**1. Experimental section**

**1.1 Chemistry**

All products were examined by thin-layer chromatography (TLC), performed on Whatman 250 lm Silica Gel GF Uniplates and visualized under UV light at 254 nm. Melting points were determined in open capillaries on the Electrothermal IA 9200 Shimazu apparatus and uncorrected. Purification was done by crystallization and the open flash silica gel column chromatography using Merck silica gel 60 (240–400 mesh). IR spectra were recorded on FT-IR IMPACT-410 using KBr discs. Nuclear magnetic resonance spectra (1H and 13C NMR) were recorded using tetramethylsilane (TMS) as an internal standard on a Bruker 600 MHz spectrometer with DMSO–*d6* as solvents. Chemical shifts are reported in parts per million (ppm) downfield from TMS as an internal standard and coupling constants (*J*) are expressed in hertz (Hz). Multiplicities are shown as the abbreviations: s (singlet), brs (broad singlet), d (doublet), t (triplet), m (multiplet). High–resolution mass spectra were recorded on Agilent 6200 MS. The elemental (C, H, N) analyses were performed on a Perkin Elmer model 2400 elemental analyser. Reagents and solvents were purchased from Aldrich or Fluka Chemical Corp. (Milwaukee, WI, USA) or Merck unless noted otherwise. Solvents were distilled and dried before use.

*General procedure for the synthesis of compounds* ***2a–g***

In a round-bottom flask, a solution of substituted 2-hydroxybenzaldehyde (**1a–g**) (5.6 gram, 40 mmol) and Meldrum’s acid (7.3 gram, 48 mmol) was stirred in aqueous methanol at reflux for 5-6 h. The precipitate was obtained by filtration and washing with cold water to give the solid (**2a–g**) and was used directly for the next step without further purification.

*General procedure for the synthesis of compounds* ***3a–g***

A mixture of **2a–g** (200 mg)and ethyl 7-aminoheptanoate (1.5 eq), EDC.HCl (1.5eq), 4-DMAP (1 eq) in DCM (5 mL) was stirred at room temperature for 6 hours. The reaction was monitored by TLC using CH2Cl2:MeOH =20:1 as a developing solvent system. The reaction mixture was evaporated using a rotovapor. The resulting precipitate was filtered, washed with ice–cold diluted HCl, NaCO3 and MeOH and dried at 60oC for 10 hours to obtain the desired products and were used directly for the next step without further purification. The corresponding ester intermediates was then hydrolyzed in the mixture of MeOH:H2O = 4:1 using LiOH (10 eq) for 5 hours. At the end of this reaction, the solvent was evaporated and the resulting mixture was diluted with ice–cooled water and acidified with HCl 1M until pH = 3. The resulting precipitate was filtered, washed with ice–cooled water to give the carboxylic acid intermediates **3a-g**.

***7-(2-Oxo-2H-chromene-3-carboxamido)heptanoic acid (3a)***

White solid; yield: 63% (210 mg). Mp: 155oC–156oC, *Rf* = 0.64 (CH2Cl2:MeOH = 10:1). 1H–NMR (600 MHz, DMSO–*d6*): δ 11.97 (s, 1H, COOH), 8.84 (s, 1H, H–4), 8.70 (t, *J* = 5.4Hz, CONH), 7.98 (dd, *J* = 7.8 Hz, 1.2 Hz, 1H, H–5), 7.74 (dt, *J* = 7.8 Hz, 1.2 Hz, 1H, H–7), 7.50 (d, *J* = 8.4Hz, 1H, H–8), 7.44 (dt, *J* = 7.8 Hz, 1.2 Hz, 1H, H–6), 3.32 (m, 2H, NHCH2), 2.50 (t, *J* = 7.2Hz, CH2), 1.54–1.50 (m, 4H, CH2), 1.32–1.31 (m, 4H, CH2). 13C–NMR (125MHz, DMSO–*d6*): δ 174.38, 160.94 , 160.34, 153.79, 147.17, 133.92, 130.14, 125.04, 119.11, 118.43, 116.06, 33.55, 28.75, 28.17, 26.08, 24.37.

***7-(7-Fluoro-2-oxo-2H-chromene-3-carboxamido)heptanoic acid (3b)***

White solid; yield: 54% (174 mg). Mp: 187oC–188oC, *Rf* = 0.68 (CH2Cl2:MeOH = 10:1). 1H–NMR (600 MHz, DMSO–*d6*): δ 11.94 (s, 1H, OH), 8.81 (s, 1H, H–4), 8.66 (br, 1H, NH), 7.88 (m, 1H, H–5), 7.63 (m, 1H, H–6), 7.57 (m, 1H, H–8), 2.20 (t, J = 8.4 Hz, 2H, CH2), 1.52–1.50 (m, 4H, CH2), 1.32–1.30 (m, 4H, CH2). 13C–NMR (125MHz, DMSO–*d6*): δ 174.39, 160.72, 160.06, 157.18, 150.22, 146.21, 121.29, 120.19, 119.42, 118.17, 115.11, 33.54, 28.72, 28.16, 26.06, 24.36.

***7-(7-Bromo-2-oxo-2H-chromene-3-carboxamido)heptanoic acid (3c)***

White solid; yield: 59% (174 mg). Mp: 223oC–224 oC, *Rf* = 0.71 (CH2Cl2:MeOH = 10:1). 1H–NMR (600 MHz, DMSO–*d6*): δ 12.04 (br, 1H, COOH) 8.82 (s, 1H, H–4), 8.63 (d, *J* = 5.4Hz, 1H, NH), 7.92 (d, *J* = 7.8Hz, 1H, H–5), 7.84 (s, 1H, H–8), 7.65 (m, 1H, H–6), 3.31 (m, 2H, NHCH2), 2.20 (t, *J* = 7.2Hz, 2H, CH2), 1.52 (s, 4H, CH2), 1.31 (s, 4H, CH2). 13C–NMR (150MHz, DMSO–*d6*): δ 174.42, 160.82, 159.80, 154.06, 146.50, 131.51, 128.23, 126.94, 119.50, 119.16, 117.78, 33.56, 28.75, 28.28, 26.09, 24.39.

***7-(7-Methoxy-2-oxo-2H-chromene-3-carboxamido)heptanoic acid (3d)***

White solid; yield: 68% (214 mg). Mp: 141oC–142 oC, *Rf* = 0.64 (CH2Cl2:MeOH = 10:1). 1H–NMR (600 MHz, DMSO–*d6*): δ 11.95 (s, 1H, OH), 8.81 (s, 1H, H–4), 8.62 (t, *J* = 6.0 Hz, NH), 7.90 (d, *J* = 8.4 Hz, 1H, H–5), 7.11 (d, *J* = 2.4 Hz, 1H, H–8), 7.04 (dd, *J* = 2.4 Hz, 8.4 Hz, 1H, H–6), 3.90 (s, 3H, OCH3), 3.30 (m, 2H, CH2), 2.19 (t, *J* = 7.8Hz, CH2), 1.52–1.49 (m, 4H, CH2), 1.32–1.30 (m, 4H, CH2). 13C–NMR (125MHz, DMSO–*d6*): δ 174.38, 164.30, 161.24, 160.84, 156.06, 147.56, 131.44, 114.98, 113.55, 112.10, 100.23, 55.19, 33.55, 28.81, 28.17, 26.09, 24.37.

***7-(6-Methyl-2-oxo-2H-chromene-3-carboxamido)heptanoic acid (3e)***

White solid; yield: 51% (165 mg). Mp: 181oC–182 oC, *Rf* = 0.66 (CH2Cl2:MeOH = 10:1). 1H–NMR (600 MHz, DMSO–*d6*): δ 13.00 (s, 1H, COOH), 8.75 (s, 1H, H–4), 8.68 (t, *J* = 5.4Hz, 1H, CONH), 7.74 (s, 1H, H–5), 7.56 (d, *J* = 8.4Hz, 1H, H–7), 7.39 (d, *J* = 8.4Hz, 1H, H–8), 3.30 (m, 2H, CH2), 2.38 (s, 3H, CH3), 2.20 (t, *J* = 7.2Hz, 2H, CH2CO), 1.51 (m, 4H, CH2), 1.31 (m, 4H, CH2). 13C–NMR (125MHz, DMSO–*d6*): δ 174.40, 160.98, 160.50, 151.98, 147.13, 134.89, 134.43, 129.58, 118.90, 118.15, 115.82, 33.56, 28.76, 28.18, 26.09, 24.38, 20.17.

***7-(6-Bromo-2-oxo-2H-chromene-3-carboxamido)heptanoic acid (3f)***

White solid; yield: 43% (127 mg). Mp: 243oC–244 oC, *Rf* = 0.68 (CH2Cl2:MeOH = 10:1). 1H–NMR (600 MHz, DMSO–*d6*): δ 11.95 (s, 1H, COOH), 8.79 (s, 1H, H–4), 8.63 (t, *J* = 5.4Hz, 1H, CONH), 8.24 (s, 1H, H–5), 7.87 (d, *J* = 9.0Hz, 1H, H–7), 7.46 (d, *J* = 8.4Hz, 1H, H–8), 3.31 (q, *J* = 6.6Hz, 2H, CH2NH), 2.20 (t, *J* = 7.2Hz, 2H, CH2), 1.51 (m, 4H, CH2), 1.31 (m, 4H, CH2). 13C–NMR (125MHz, DMSO–*d6*): δ 174.37, 160.64, 159.82, 152.80, 145.82, 136.06, 131.98, 120.31, 120.27, 118.33, 116.56, 33.54, 28.71, 28.16, 26.06, 24.36.

***7-(6-Methoxy-2-oxo-2H-chromene-3-carboxamido)heptanoic acid (3g)***

White solid; yield: 55% (173 mg). Mp: 167oC–168 oC, *Rf* = 0.68 (CH2Cl2:MeOH = 10:1). 1H–NMR (600 MHz, DMSO–*d6*): δ 11.95 (s, 1H, COOH), 8.80 (s, 1H, H–4), 8.70 (t, *J* = 5.4Hz, 1H, CONH), 7.54 (d, *J* = 3.0Hz, 1H, H–5), 7.44 (d, *J* = 9.0Hz, 1H, H–8), 7.32 (dd, *J* = 9.0Hz; 3.0Hz, 1H, H–8), 3.83 (s, 3H, OCH3), 3.31 (m, 2H, CH2), 2.20 (t, *J* = 7.2Hz, 2H, CH2), 1.51 (m, 4H, CH2), 1.31 (m, 4H, CH2). 13C–NMR (125MHz, DMSO–*d6*): δ 174.38, 160.94, 160.48, 155.90, 148.28, 147.07, 121.81, 119.14, 118.89, 117.17, 111.77, 55.78, 33.54, 28.75, 28.16, 26.08, 24.37.

*General procedure for the synthesis of compounds* ***5a–g, 7a–g***.

Compounds **5a-g** and **7a-g** were synthesized as illustrated in scheme 1. The procedures were similar to that described for compound **3a-g** using commercially available methyl 4-(aminomethyl)benzoate and methyl 3-(aminomethyl)benzoate instead of ethyl 7-aminoheptanoate.

***4-((2-Oxo-2H-chromene-3-carboxamido)methyl)benzoic acid (5a)***

White solid; yield: 71% (241 mg). Mp: 277oC–278oC. *Rf* = 0.63 (CH2Cl2:MeOH = 10:1). 1H–NMR (600 MHz, DMSO–d6): δ: 9.21 (t, *J* = 6.0 Hz, NH), 8.88 (s, 1H, H–4), 7.99 (dd, *J* = 7.8 Hz; 1.2 Hz, 1H, H–5), 7.91 (d, *J* = 8.4 Hz, 2H, H–3΄; H–5΄), 7.75 (td, *J* = 7.8 Hz; 1.2 Hz, 1H, H–7), 7.51 (d, *J* = 8.4 Hz, 1H, H–8), 7.47 (d, *J* = 8.4 Hz, 2H, H–2΄; H–6΄), 7.43 (m, 1H, H–6), 4.62 (d, *J* = 6.0 Hz, 2H, NHCH2). 13C–NMR (125MHz, DMSO–d6): δ: 167.08, 161.41, 160.20, 153.86, 147.54, 144.09, 134.05, 130.20, 129.39, 129.36, 127.26, 125.06, 119.01, 118.40, 116.07, 42.49.

***4-((7-Fluoro-2-oxo-2H-chromene-3-carboxamido)methyl)benzoic acid (5b)***

White solid; yield: 67% (210 mg). Mp: 252oC–253oC. *Rf* = 0.60 (CH2Cl2:MeOH = 10:1). 1H–NMR (600 MHz, DMSO–*d6*): δ 12.90 (br, 1H, OH), 9.23 (t, *J* = 6.0 Hz, 1H, CONH), 8.85 (s, 1H, H–4),7.92 (d, *J* = 8.4 Hz, 2H, H–3΄; H–5΄), 7.89 (dd, J=3.0Hz, 8.4Hz, 1H, H–5), 7.65–7.61 (dt, J=3.0Hz, 8.4Hz, 1H, H–6), 7.58–7.56 (dd, J=4.2Hz, 8.4Hz, 1H, H–8), 7.46 (d, *J* = 8.4 Hz, 2H, H–2΄; H–6΄), 4.62 (d, *J* = 6.6 Hz, 2H, NHCH2). 13C–NMR (125MHz, DMSO–d6): δ 167.13, 161.21, 159.97, 159.13, 150.32, 146.63, 144.08, 129.39, 127.29, 121.41, 120.07, 119.40, 118.22, 115.20, 42.58.

***4-((7-Bromo-2-oxo-2H-chromene-3-carboxamido)methyl)benzoic acid (5c)***

White solid; yield: 53% (158 mg). Mp: 221oC–222oC. *Rf* = 0.57 (CH2Cl2:MeOH = 10:1). 1H–NMR (600 MHz, DMSO–d6): δ 9.17 (t, *J* = 6.0 Hz, NH), 8.86 (s, 1H, H–4), 7.91 (m, 3H, H–5; H–3΄, H–5΄), 7.85 (s, 1H, H–8), 7.65 (dd, *J* = 8.4 Hz, 1.8 Hz, 1H, H–6), 7.46 (d, *J* = 8.4 Hz, 2H, H–2΄; H–6΄), 4.58 (d, *J* = 6.0 Hz, 2H, CH2). 13C–NMR (125MHz, DMSO–d6): δ 167.63, 161.80, 160.16, 154.62, 147.37, 144.58, 132.60, 129.88, 128.77, 127.79, 127.61, 119.88, 119.68, 118.62, 118.23, 43.07.

***4-((7-Methoxy-2-oxo-2H-chromene-3-carboxamido)methyl)benzoic acid (5d)***

White solid; yield: 75% (241 mg). Mp: 265oC–266oC. *Rf* = 0.61 (CH2Cl2:MeOH = 10:1). 1H–NMR (600 MHz, DMSO–d6): δ 12.89 (br, 1H, COOH), 9.17 (t, *J* = 6.0 Hz, NH), 8.84 (s, 1H, H–4), 7.91 (m, 3H, H–5; H–3΄, H–5΄), 7.45 (d, *J* = 7.8 Hz, 2H, H–2΄; H–6΄) 7.11 (d, *J* = 1.8 Hz, 1H, H–8), 7.04 (dd, *J* = 8.4 Hz, 2.4 Hz, 1H, H–6), 4.58 (d, *J* = 6.0 Hz, 2H, NHCH2), 3.90 (s, 3H, OCH3). 13C–NMR (125MHz, DMSO–d6): δ 167.16, 164.44, 161.73, 160.74, 156.19, 147.98, 144.22, 131.54, 129.49 129.40, 127.27, 114.80, 113.59, 112.10, 100.27, 56.22, 42.49.

***4-((6-Methyl-2-oxo-2H-chromene-3-carboxamido)methyl)benzoic acid (5e)***

White solid; yield: 67% (221 mg). Mp: 271oC–272oC. *Rf* = 0.59 (CH2Cl2:MeOH = 10:1). 1H–NMR (600 MHz, DMSO–d6): δ: 9.13 (t, *J* = 6.0 Hz, NH), 8.76 (s, 1H, H–4), 7.91 (d, *J* = 8.4 Hz, 2H, H–3΄; H–5΄), 7.71 (s, 1H, H–5), 7.55 (dd, *J* = 8.4 Hz; 1.8 Hz, 1H, H–7), 7.46 (d, *J* = 8.4 Hz, 2H, H–2΄; H–6΄), 7.36 (d, *J* = 9.0 Hz, 1H, H–8), 4.62 (d, *J* = 6.0 Hz, 2H, NHCH2), 2.38 (s, 3H, CH3). 13C–NMR (125MHz, DMSO–d6): δ: 167.21, 161.56, 160.46, 152.12, 147.61, 144.20, 135.14, 134.57, 129.72, 129.47, 127.38, 118.80, 118.18, 115.92, 42.61, 20.24.

***4-((6-Bromo-2-oxo-2H-chromene-3-carboxamido)methyl)benzoic acid (5f)***

White solid; yield: 55% (160 mg). Mp: 286oC–287oC. *Rf* = 0.61 (CH2Cl2:MeOH = 10:1). 1H–NMR (600 MHz, DMSO–d6): δ: 12.89 (br, 1H, COOH), 9.19 (t, *J* = 6.0 Hz, NH), 8.83 (s, 1H, H–4), 8.25 (d, *J* = 2.4 Hz, 1H, H–5),7.91 (d, *J* = 8.4 Hz, 2H, H–3΄; H–5΄), 7.55 (dd, *J* = 9.0 Hz; 2.4 Hz, 1H, H–7), 7.48 (d, *J* = 9.0 Hz, 1H, H–8), 7.46 (d, *J* = 8.4 Hz, 2H, H–2΄; H–6΄), 4.61 (d, *J* = 6.0 Hz, 2H, NHCH2). 13C–NMR (125MHz, DMSO–d6): δ: 167.08, 161.13, 159.59, 152.89, 146.20, 144.04, 136.20, 132.05, 129.35, 127.27, 120.29, 120.19, 118.36, 116.57, 42.55.

***4-((6-Methoxy-2-oxo-2H-chromene-3-carboxamido)methyl)benzoic acid (5g)***

White solid; yield: 69% (231 mg). Mp: 228oC–229oC. *Rf* = 0.64 (CH2Cl2:MeOH = 10:1). 1H–NMR (600 MHz, DMSO–d6): δ: 12.89 (br, 1H, COOH), 9.25 (t, *J* = 6.0 Hz, NH), 8.84 (s, 1H, H–4), 7.92 (d, *J* = 7.8 Hz, 2H, H–3΄; H–5΄), 7.55 (d, *J* = 3.0 Hz, 1H, H–5), 7.44–7.47 (m, 3H, H–8; H–2΄; H–6΄), 7.34 (dd, *J* = 9.0 Hz; 3.0 Hz, 1H, H–7), 4.63 (d, *J* = 6.0 Hz, 2H, NHCH2), 3.83 (s, 3H, OCH3). 13C–NMR (125MHz, DMSO–d6): δ: 167.13, 161.46, 160.39, 155.93, 148.39, 147.49, 144.14, 129.41, 127.29, 121.99, 119.04, 118.88, 117.24, 111.82, 55.80, 42.46.

***3-((2-Oxo-2H-chromene-3-carboxamido)methyl)benzoic acid (7a)***

White solid; yield: 72% (243 mg). Mp: 215oC–216oC. *Rf* = 0.58 (CH2Cl2:MeOH = 10:1). 1H–NMR (600 MHz, DMSO–d6): δ: 9.23 (t, *J* = 6.0 Hz, NH), 8.89 (s, 1H, H–4), 7.99 (dd, *J* = 7.8 Hz; 1.2 Hz, 1H, H–4΄), 7.96 (s, 1H, H–2΄), 7.84 (d, *J* = 7.8 Hz, 1H, H-5) 7.74 (td, *J* = 7.8 Hz; 1.2 Hz, 1H, H–7), 7.61 (d, *J* = 7.8 Hz, 1H, H-6΄), 7.51 (d, *J* = 8.4 Hz, 1H, H–8), 7.47 (t, *J* = 7.2 Hz, 1H, H–5΄), 7.44 (td, *J* = 7.2 Hz; 1.2 Hz, 1H, H–6), 4.62 (d, *J* = 6.0 Hz, 2H, NHCH2). 13C–NMR (125MHz, DMSO–d6): δ: 167.72, 161.87, 160.73, 154.40, 148.13, 140.08, 134.59, 132.47, 131.36, 130.73, 129.09, 128.82, 128.39, 125.59, 119.48, 118.93, 116.60, 43.00.

***3-((7-Fluoro-2-oxo-2H-chromene-3-carboxamido)methyl)benzoic acid (7b)***

White solid; yield: 63% (194 mg). Mp: 264oC–265oC. *Rf* = 0.63 (CH2Cl2:MeOH = 10:1). 1H–NMR (600 MHz, DMSO–d6): δ(ppm) 9.23 (t, *J* = 6.0 Hz, 1H, CONH), 8.86 (s, 1H, H–4),7.96 (s, 1H, H–2΄), 7.88 (dd, *J* = 7.8Hz, 2.4Hz, 1H, H–5), 7.84 (d, *J* = 7.8Hz, 1H, H–4΄) 7.65–7.61 (m, 2H, H–6, H–6΄), 7.58–7.56 (dd, *J* = 8.4Hz, 4.2Hz, 1H, H–8), 7.46 (t, *J* = 7.8 Hz, 1H, H–5΄), 4.61 (d, *J* = 6.0 Hz, 2H, NHCH2). 13C–NMR (125MHz, DMSO–d6): δ 167.15, 161.09, 159.89, 159.08, 150.27, 146.59, 139.43, 131.89, 130.85, 128.52, 128.25, 127.85, 121.37, 120.03, 119.35, 118.15, 115.12, 42.58.

***3-((7-Bromo-2-oxo-2H-chromene-3-carboxamido)methyl)benzoic acid (7c)***

White solid; yield: 50% (148 mg). Mp: 282oC–283oC. *Rf* = 0.57 (CH2Cl2:MeOH = 10:1). 1H–NMR (600 MHz, DMSO–d6): δ(ppm) 9.18 (t, *J* = 6.0 Hz, 1H, CONH), 8.86 (s, 1H, H–4),7.95 (s, 1H, H–2΄), 7.92 (d, *J* = 7.8Hz, 1H, H–5), 7.85*–*7.83 (m, 2H, H–4΄, H-6΄) 7.64 (dd, *J* = 8.4Hz, 1.8Hz 1H, H–6), 7.62–7.60 (m, 1H, H–8), 7.47 (t, *J* = 7.8 Hz, 1H, H–5΄), 4.60 (d, *J* = 6.0 Hz, 2H, NHCH2). 13C–NMR (125MHz, DMSO–d6): δ 167.25, 161.25, 159.70, 154.16, 146.97, 139.56, 132.01, 131.59, 128.61, 128.34, 127.93, 127.32 127.13, 119.35, 119.20, 117.76, 117.28, 42.55.

***3-((7-Methoxy-2-oxo-2H-chromene-3-carboxamido)methyl)benzoic acid (7d)***

White solid; yield: 68% (228 mg). Mp: 218oC–219oC. *Rf* = 0.59 (CH2Cl2:MeOH = 10:1). 1H–NMR (600 MHz, DMSO–d6): 9.17 (s, 1H, NH), 8.84 (s, 1H, H–4), 7.94 (s, 1H, H–2΄), 7.88 (dd, J = 6.6 Hz; 1.8 Hz, 1H, H–4΄), 7.84 (d, *J* = 7.8 Hz, H–5), 7.60 (d, *J* = 7.8 Hz, 1H, H–6΄) 7.46 (t, *J* = 7.8 Hz, 1H, H–5΄), 7.10 (s, 1H, H–8), 7.03 (d, *J* = 7.8 Hz, H–6) 4.60 (d, *J* = 4.8 Hz, 2H, NHCH2), 3.89 (s, 3H, OCH3). 13C–NMR (125MHz, DMSO–d6): δ 167.24, 164.46, 161.69, 160.74, 156.20, 148.02, 139.72, 131.97, 131.55 130.88, 128.61, 128.29, 127.88, 114.79, 113.60, 112.11, 100.29, 56.23, 42.44.

***3-((6-Methyl-2-oxo-2H-chromene-3-carboxamido)methyl)benzoic acid (7e)***

White solid; yield: 60% (165 mg). Mp: 234oC–235oC. *Rf* = 0.63 (CH2Cl2:MeOH = 10:1). 1H–NMR (600 MHz, DMSO–d6): δ: 9.23 (t, *J* = 6.0 Hz, NH), 8.78 (s, 1H, H–4), 7.95 (s, 1H, H–2΄), 7.84 (d, *J* = 7.2 Hz, 1H, H–4΄) 7.73 (s, 1H, H–5), 7.61 (d, *J* = 7.8 Hz, 1H, H–6΄), 7.55 (d, *J* = 8.4Hz; 1.8 Hz, 1H, H–7), 7.45 (t, *J* = 7.8 Hz, 1H, H–5΄), 7.38 (d, *J* = 8.4 Hz, 1H, H–8), 4.60 (d, *J* = 6.0 Hz, 2H, NHCH2), 2.37 (s, 3H, CH3). 13C–NMR (125MHz, DMSO–d6): δ: 167.26, 161.47, 160.42, 152.11, 147.61, 139.61, 135.12, 134.54, 132.03, 130.91, 129.70, 128.65, 128.34, 127.94, 118.79, 118.17, 115.91, 42.53, 20.22.

***3-((6-Bromo-2-oxo-2H-chromene-3-carboxamido)methyl)benzoic acid (7f)***

White solid; yield: 54% (160 mg). Mp: 276oC–277oC. *Rf* = 0.61 (CH2Cl2:MeOH = 10:1). 1H–NMR (600 MHz, DMSO–d6): δ: 9.21 (t, *J* = 6.0 Hz, NH), 8.78 (s, 1H, H–4), 8.24 (d, *J* = 2.4 Hz, 1H, H–5) 7.95 (s, 1H, H–2΄), 7.88 (dd, *J* = 9.0Hz; 2.4 Hz, 1H, H–7), 7.84 (d, *J* = 7.8 Hz, 1H, H–4΄), 7.61 (d, *J* = 7.8 Hz, 1H, H–6΄), , 7.45 (m, 2H, H–5΄, H–8), 4.60 (d, *J* = 6.0 Hz, 2H, NHCH2). 13C–NMR (125MHz, DMSO–d6): δ: 167.70, 161.59, 160.22, 153.42, 146.77, 140.01, 136.71, 132.56, 132.48, 131.35, 129.08, 128.82, 128.40, 120.82, 120.40, 118.88, 117.08, 43.03.

***3-((6- Methoxy-2-oxo-2H-chromene-3-carboxamido)methyl)benzoic acid (7g)***

White solid; yield: 67% (225 mg). Mp: 220oC–221oC. *Rf* = 0.65 (CH2Cl2:MeOH = 10:1). 1H–NMR (600 MHz, DMSO–d6): δ: 9.26 (t, *J* = 6.0 Hz, NH), 8.84 (s, 1H, H–4), 7.96 (s, 1H, H–2΄), 7.85 (d, *J* = 7.8 Hz, 1H, H–4΄), 7.61 (d, *J* = 7.8 Hz, 1H, H–6΄), 7.54 (d, *J* = 3.0Hz, 1H, H–5), 7.46 (m, 2H, H–5΄, H–8), 7.32 (dd, *J* = 9.0Hz; 3.0Hz, 1H, H–7), 4.62 (d, *J* = 6.0 Hz, 2H, NHCH2), 3.83 (s, 3H, OCH3). 13C–NMR (125MHz, DMSO–d6): δ: 167.19, 161.36, 160.35, 155.91, 148.37, 147.48, 139.53, 131.91, 130.87, 128.56, 128.25, 127.87, 121.95, 118.99, 118.85, 117.19, 111.82, 55.78, 42.47

**Spectral data of compounds**

**Figure S1. 1H NMR of compound 3a**

**
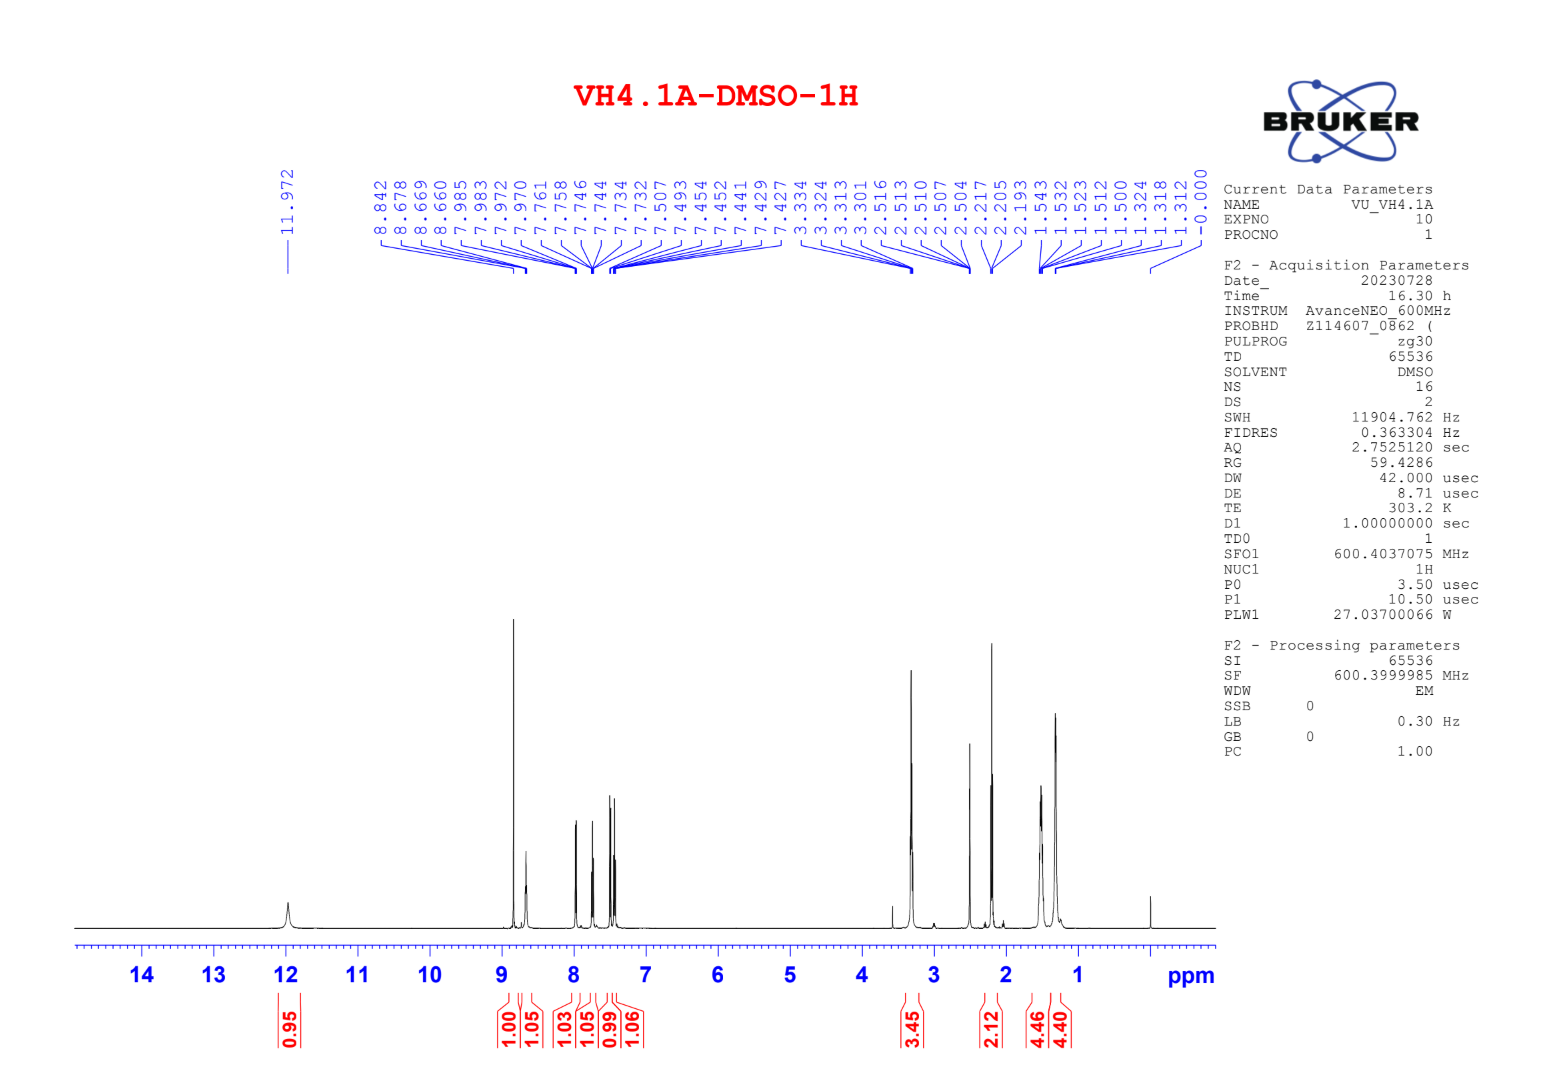
**

**Figure S2. 13C NMR of compound 3a**

**
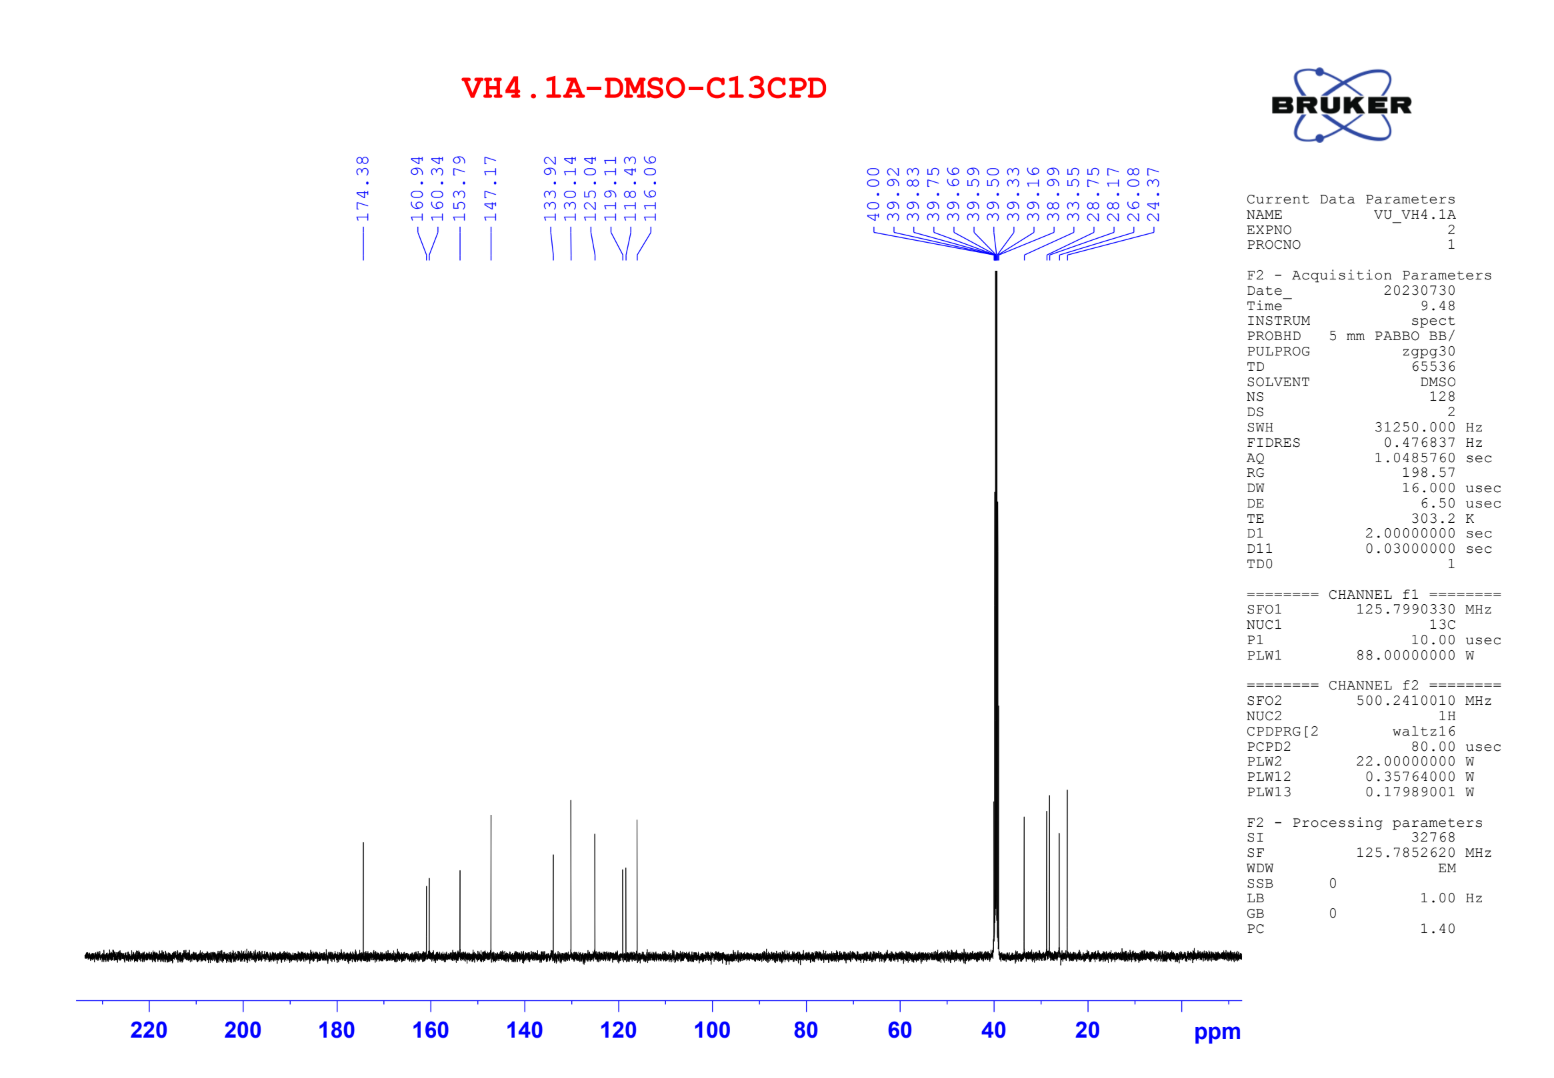
**

**Figure S3. 1H NMR of compound 3b**

**
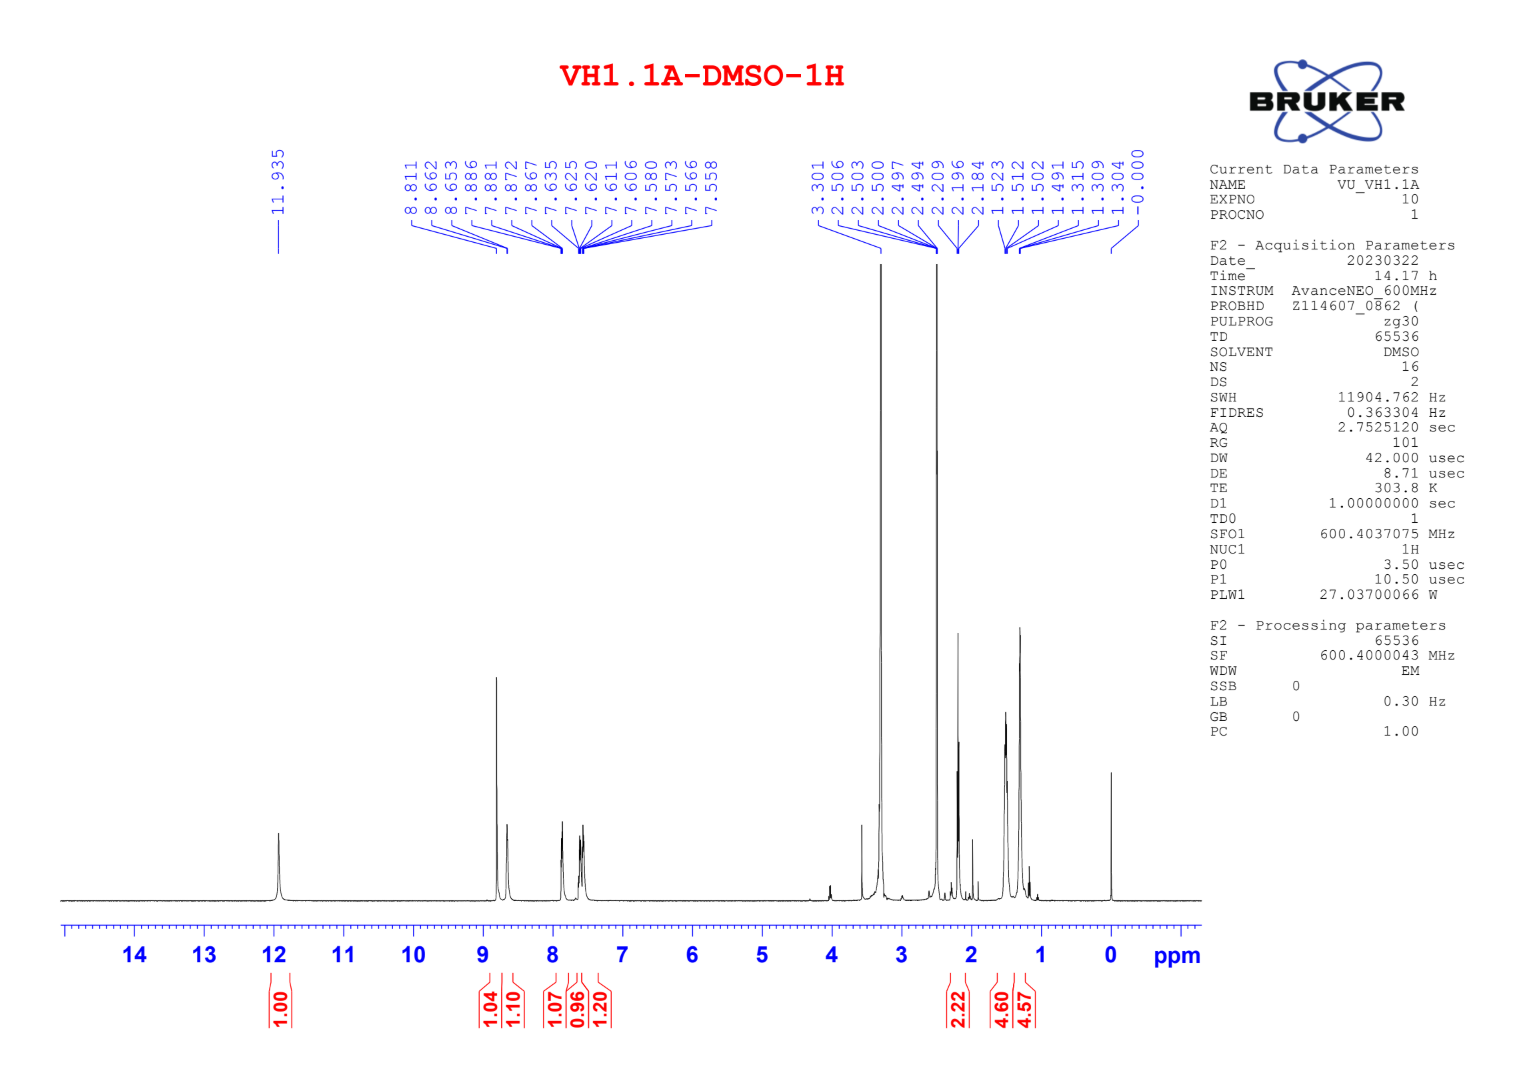
**

**Figure S4. 13C NMR of compound 3b**

**
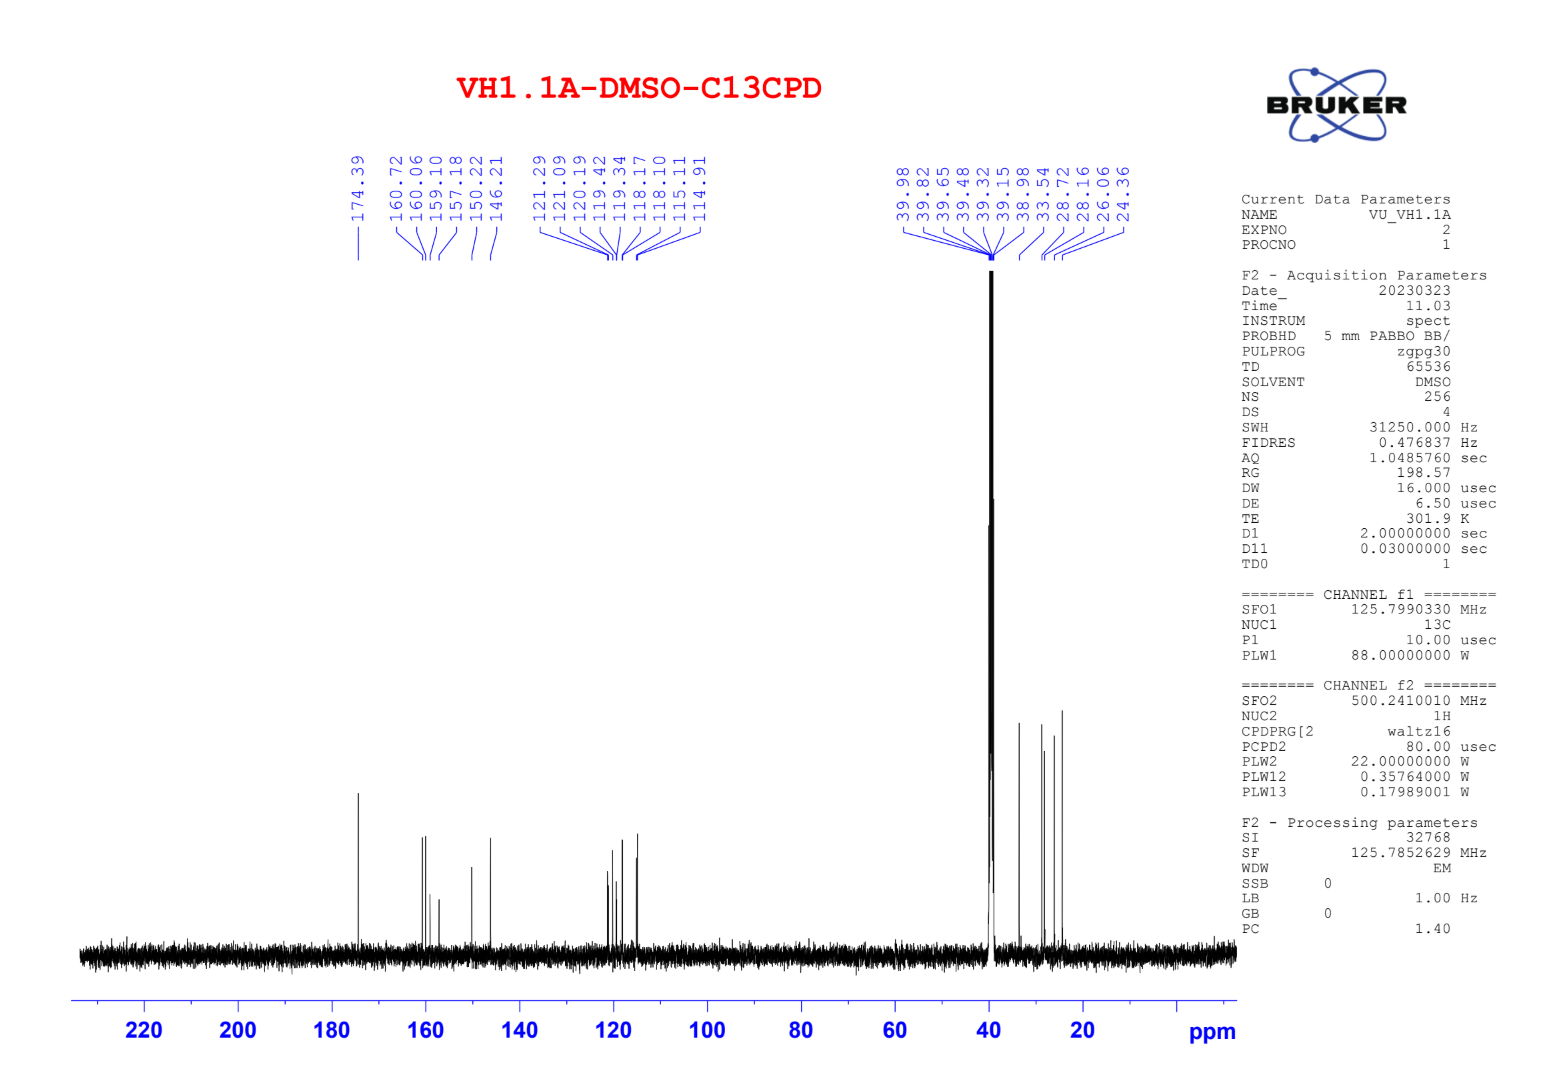
**

**Figure S5. 1H NMR of compound 3c**

**
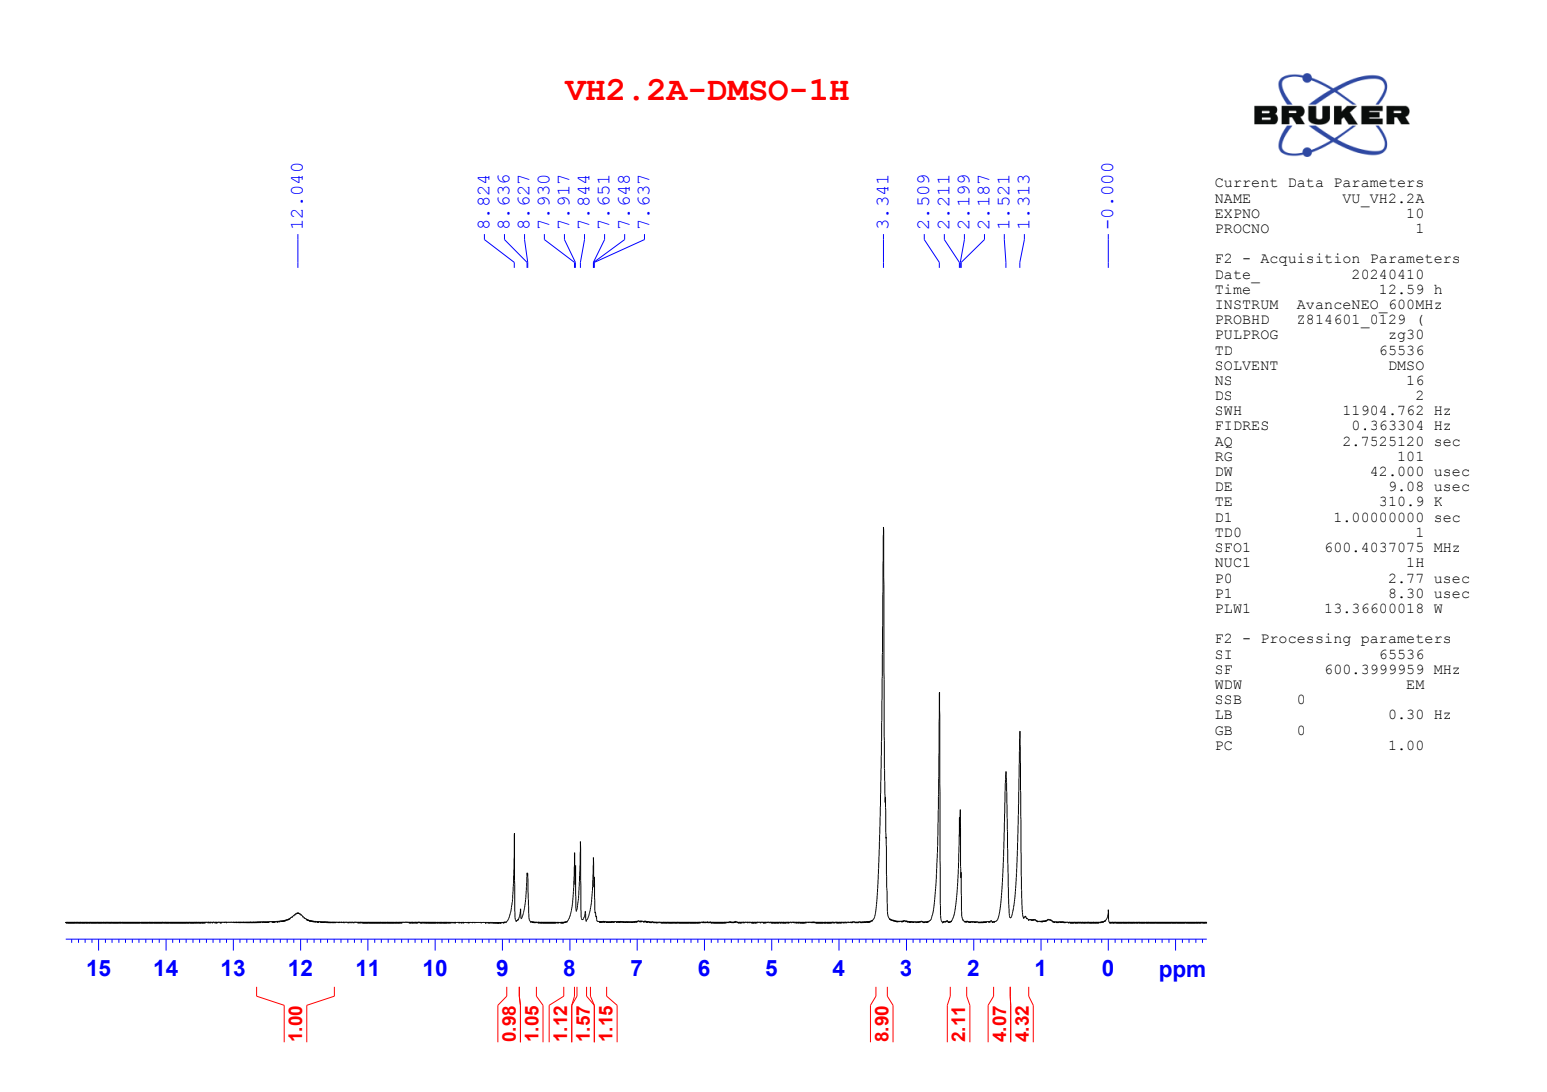
**

**Figure S6. 13C NMR of compound 3c**

**
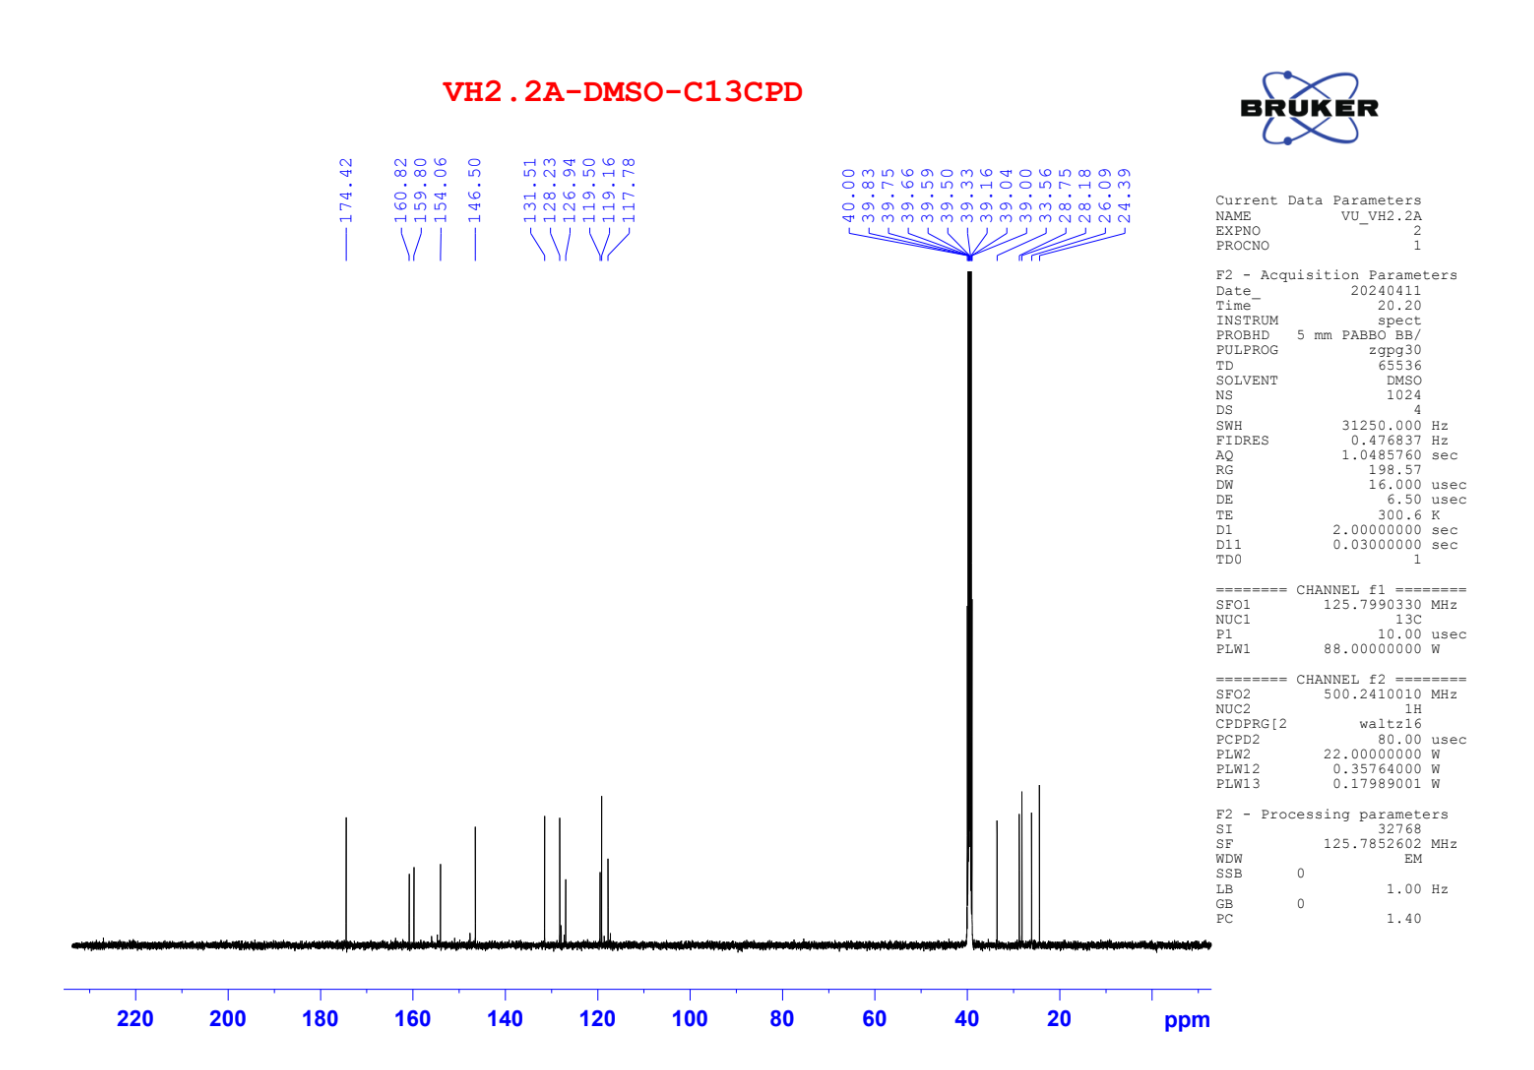
**

**Figure S7. 1H NMR of compound 3d**

**
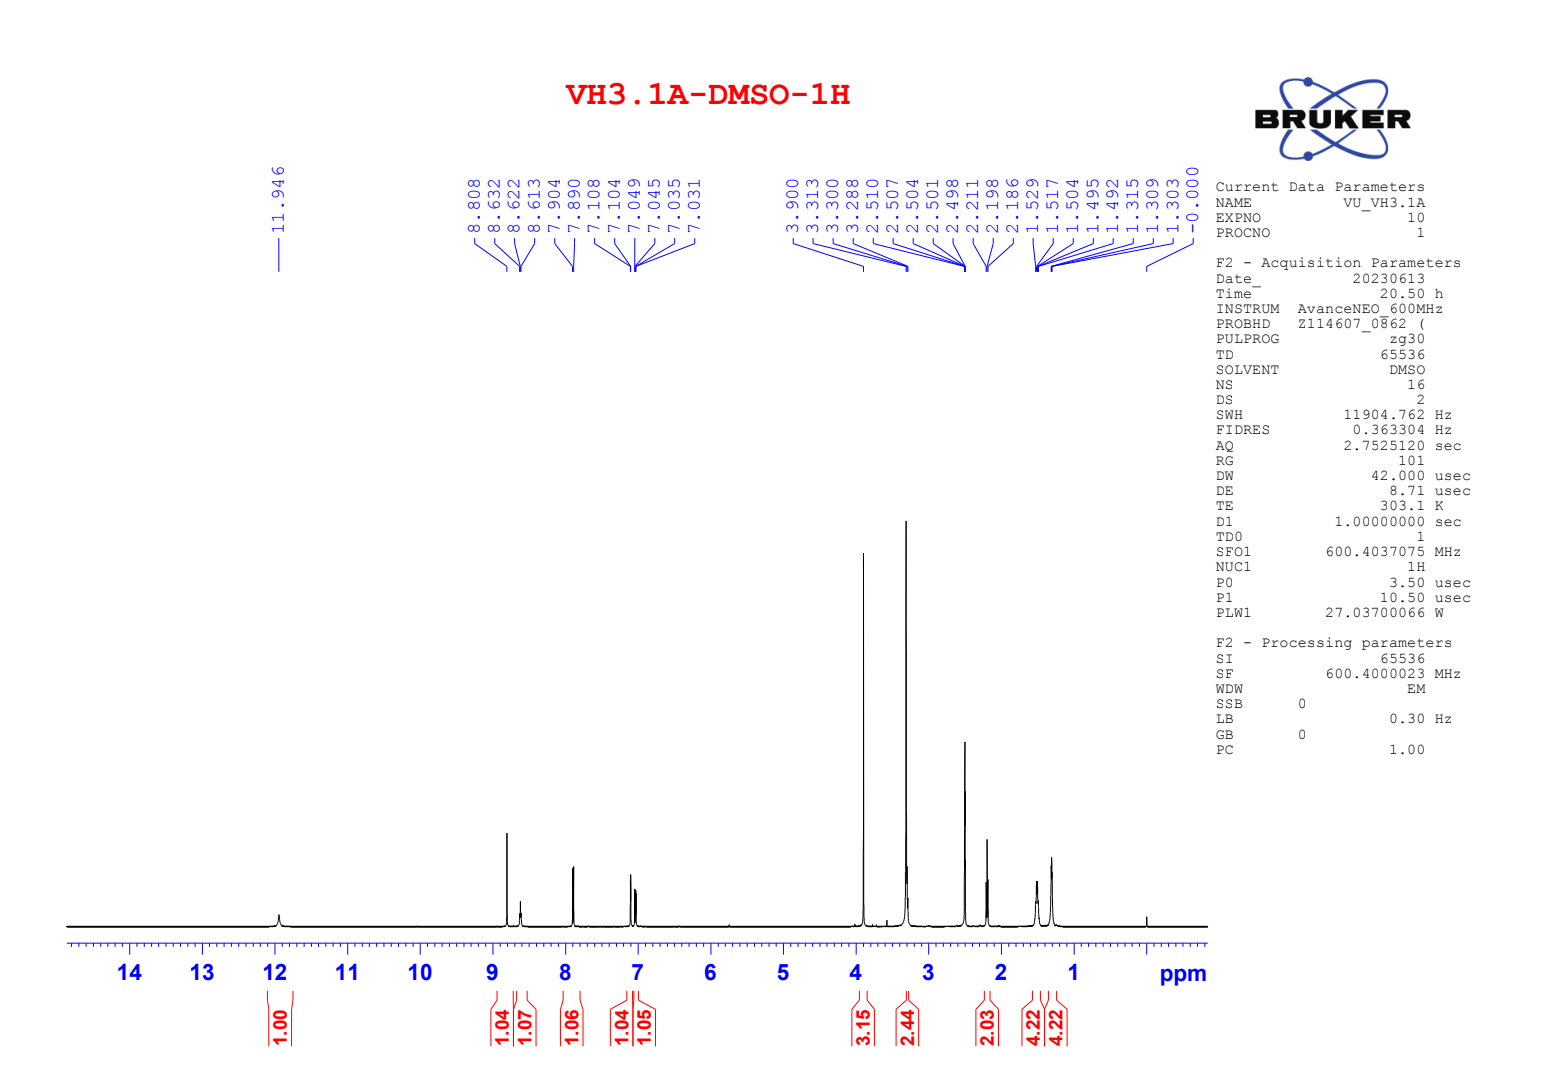
**

**Figure S8. 13C NMR of compound 3d**

**`
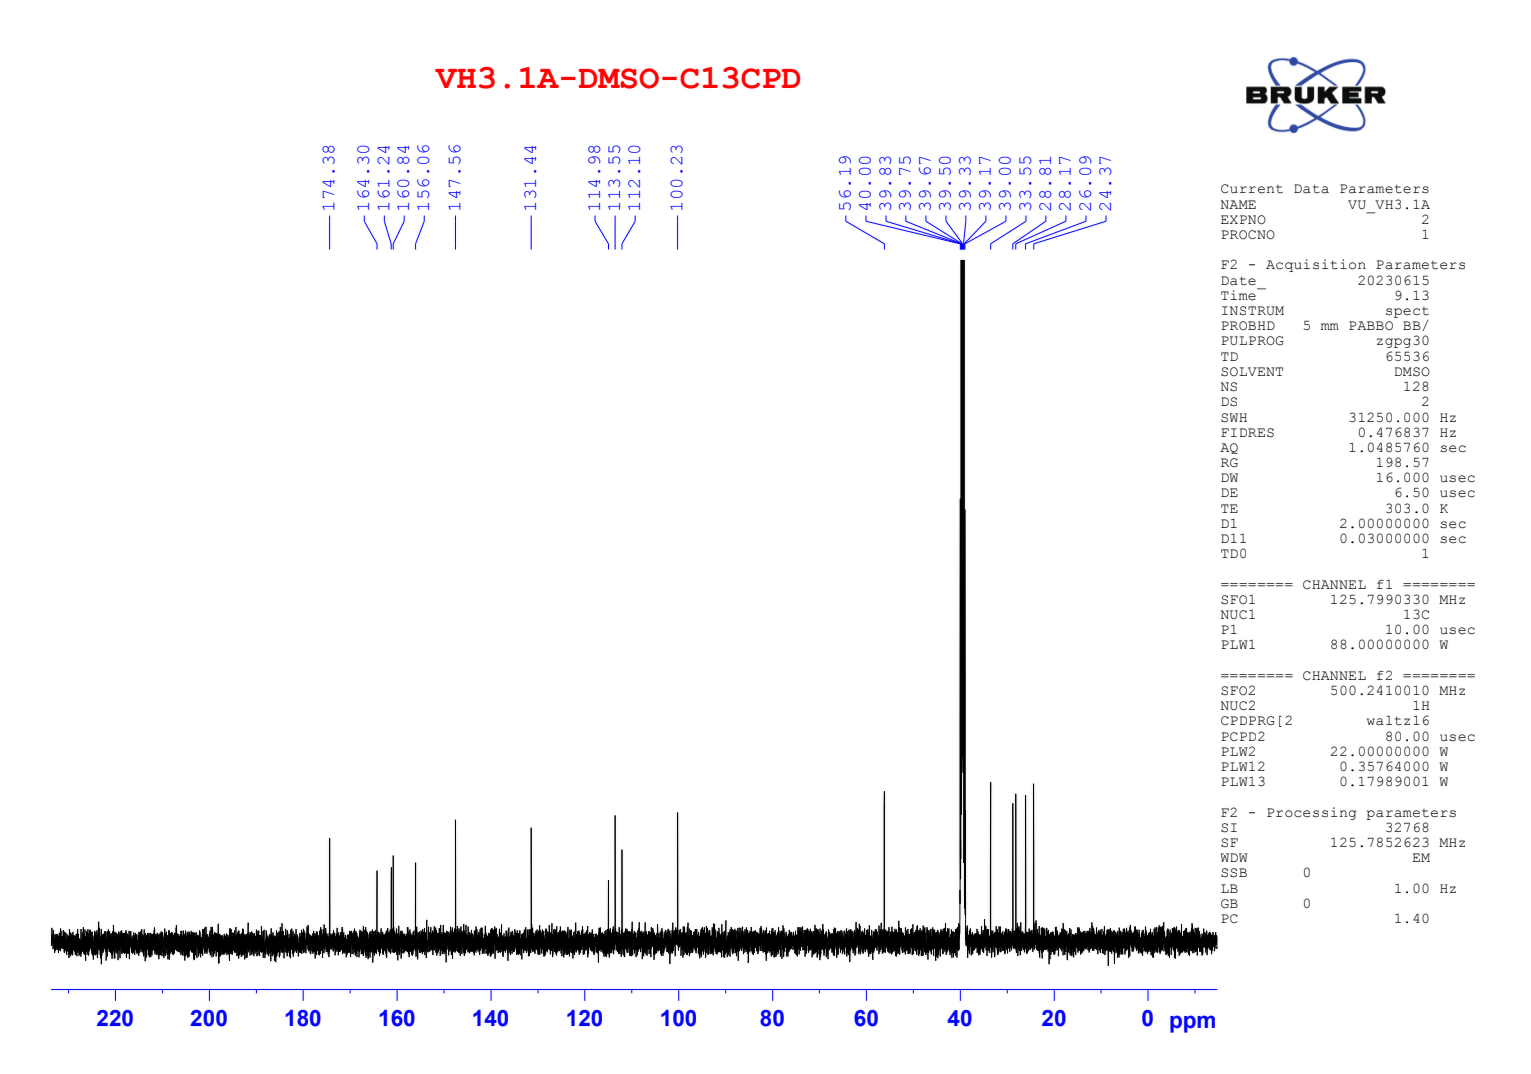
**

**Figure S9. 1H NMR of compound 3e**

**
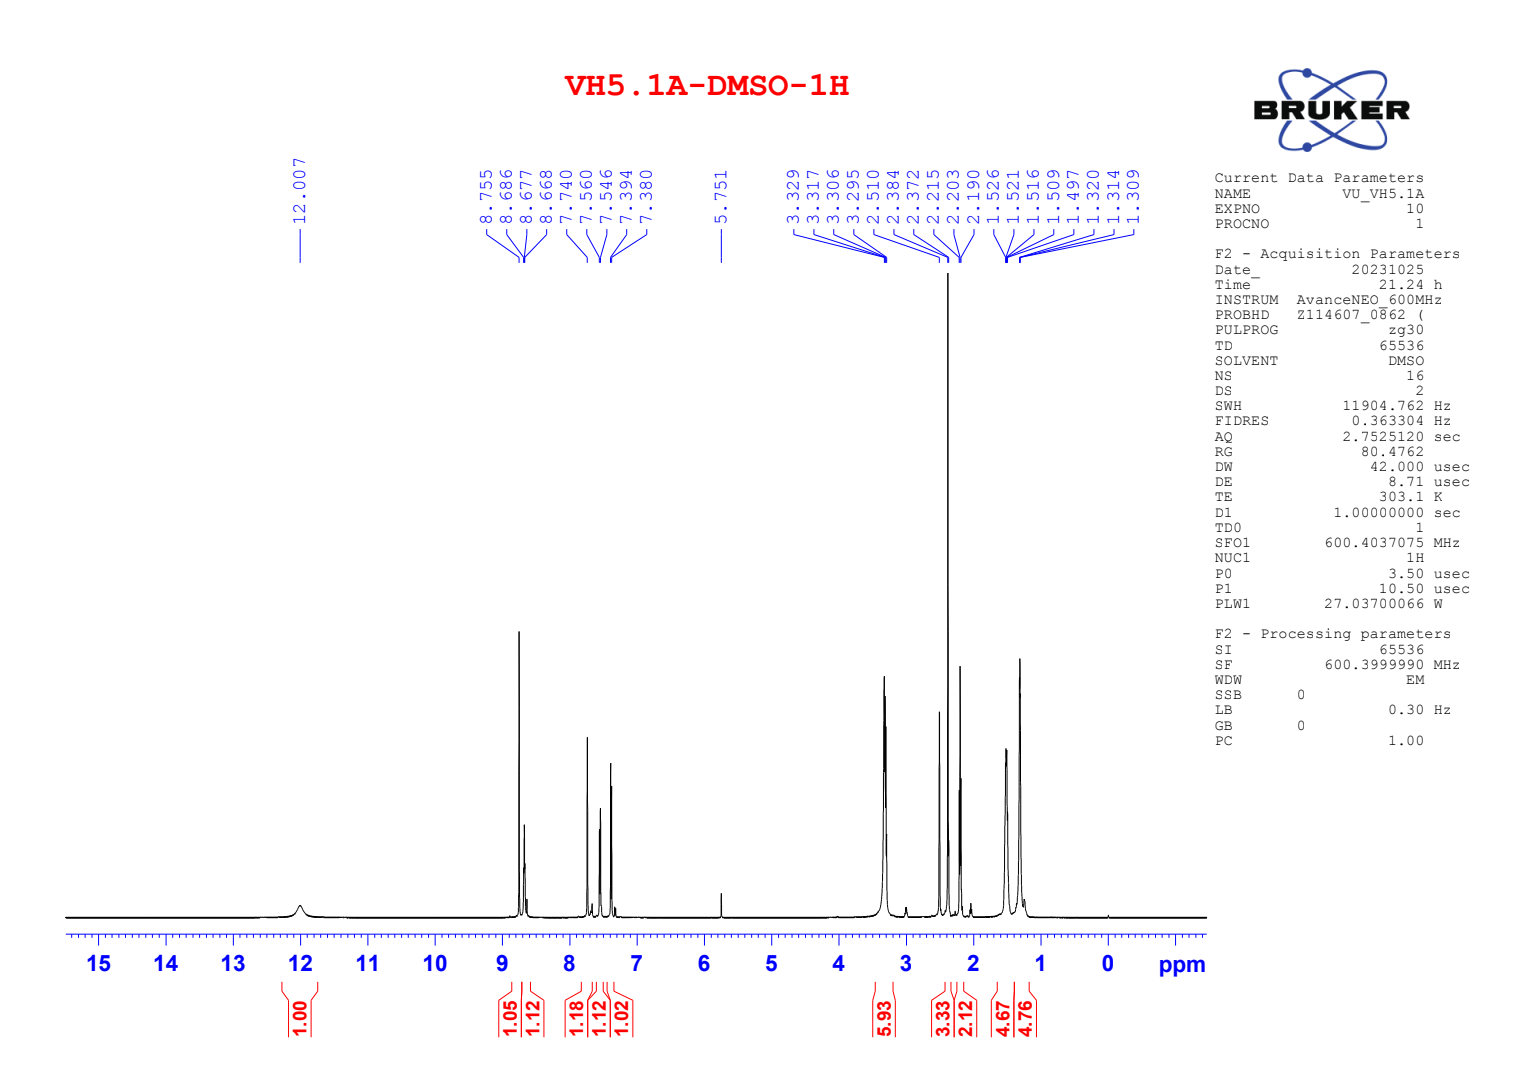
**

**Figure S10. 13C NMR of compound 3e**

**
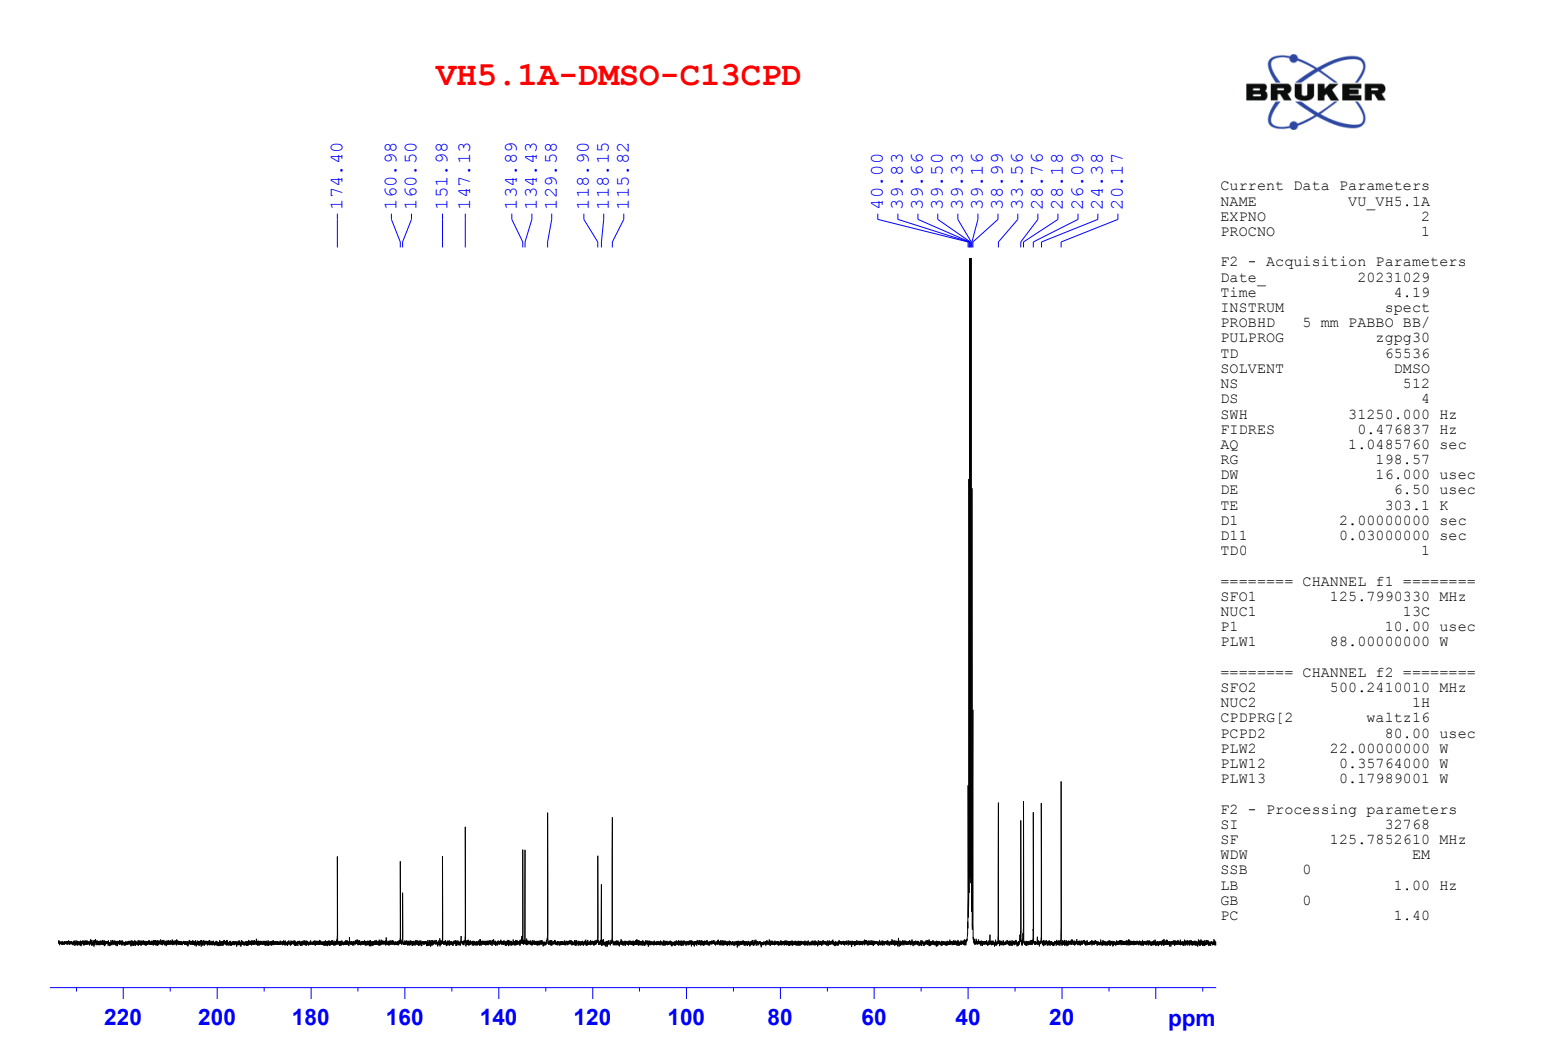
**

**Figure S11. 1H NMR of compound 3f**

**
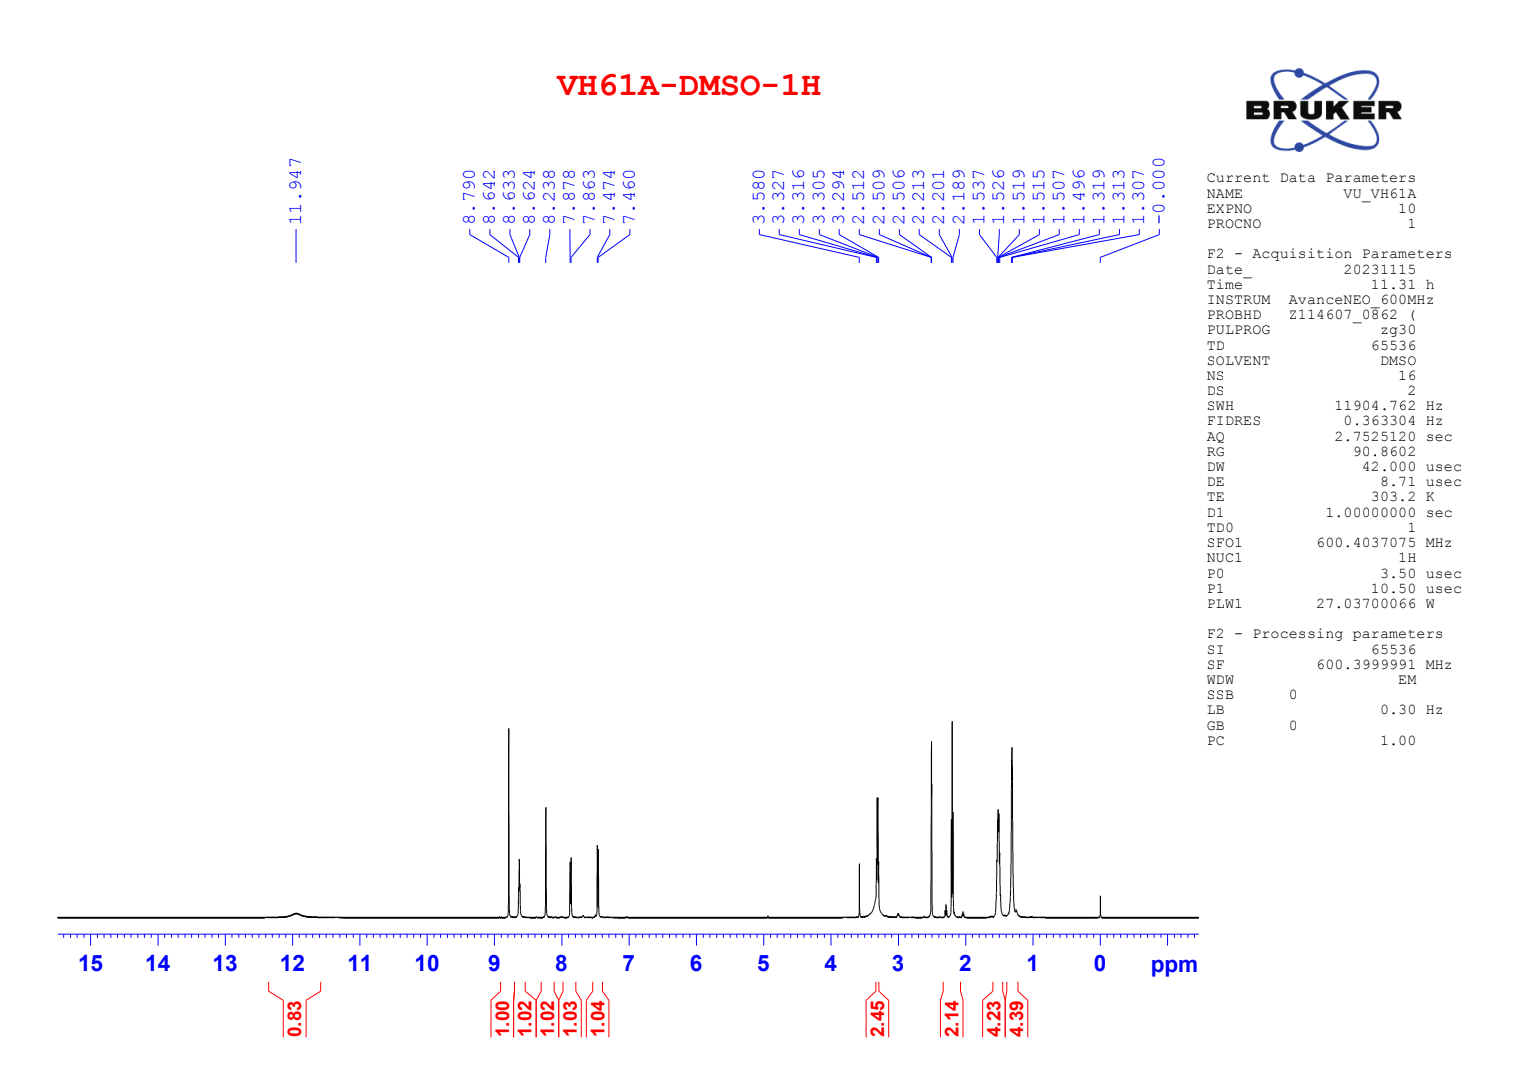
**

**Figure S12. 13C NMR of compound 3f**

**
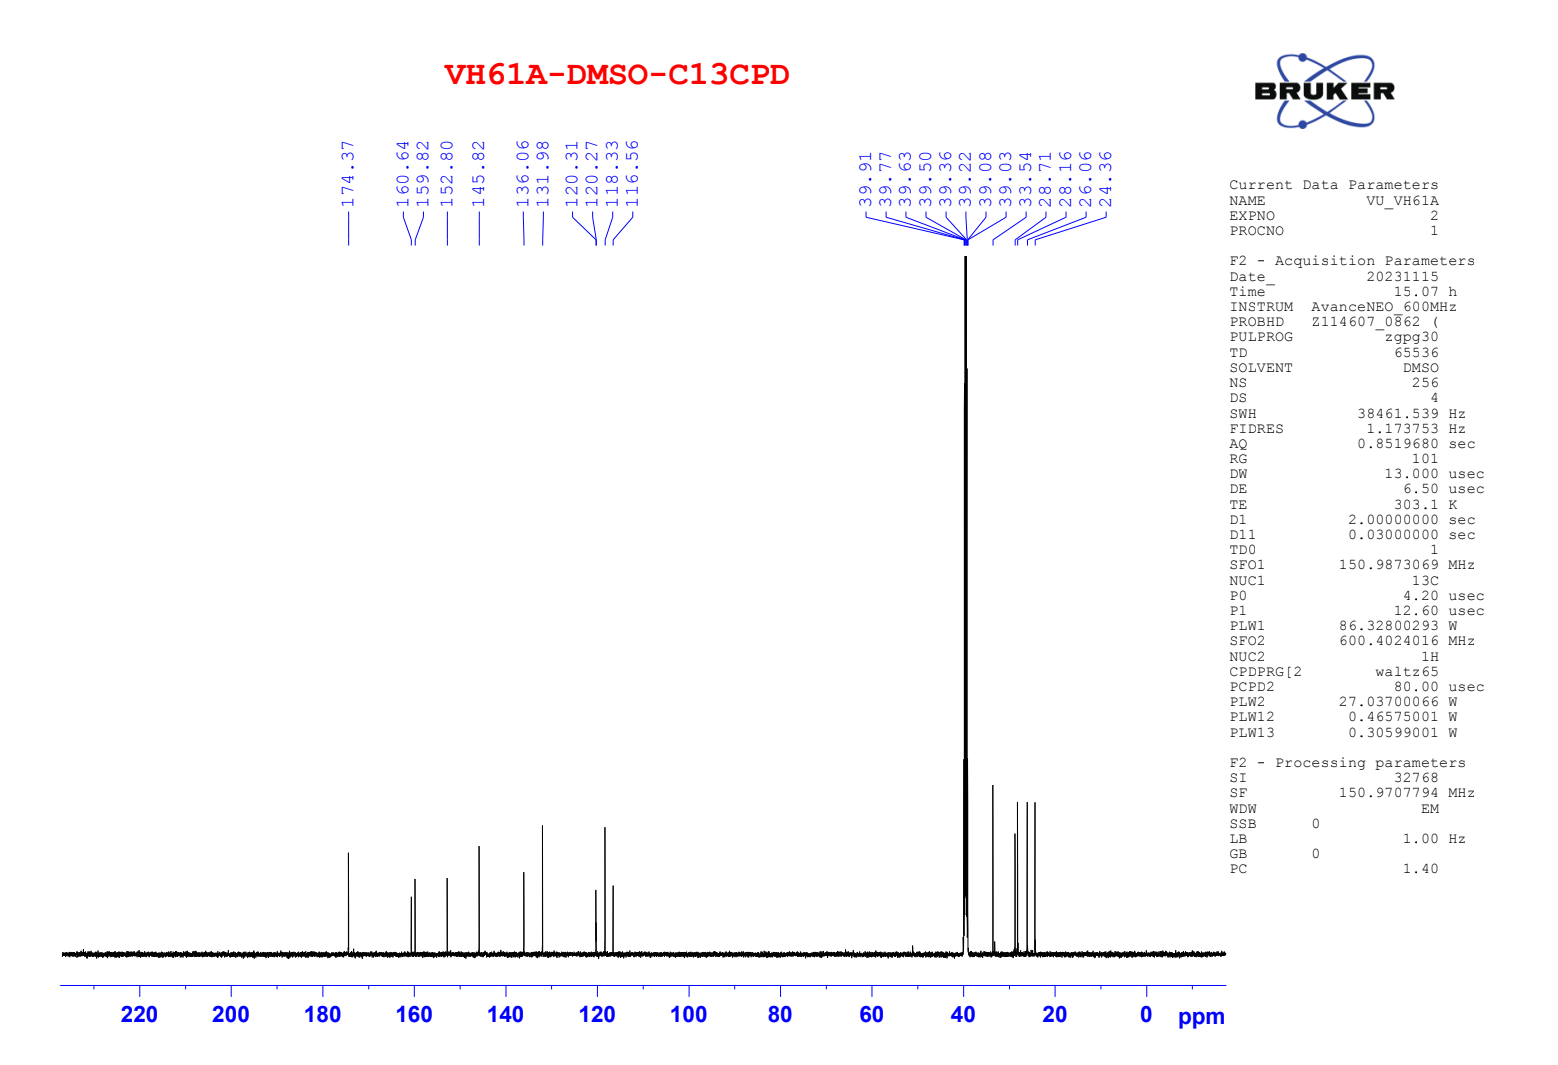
**

**Figure S13. 1H NMR of compound 3g**

**
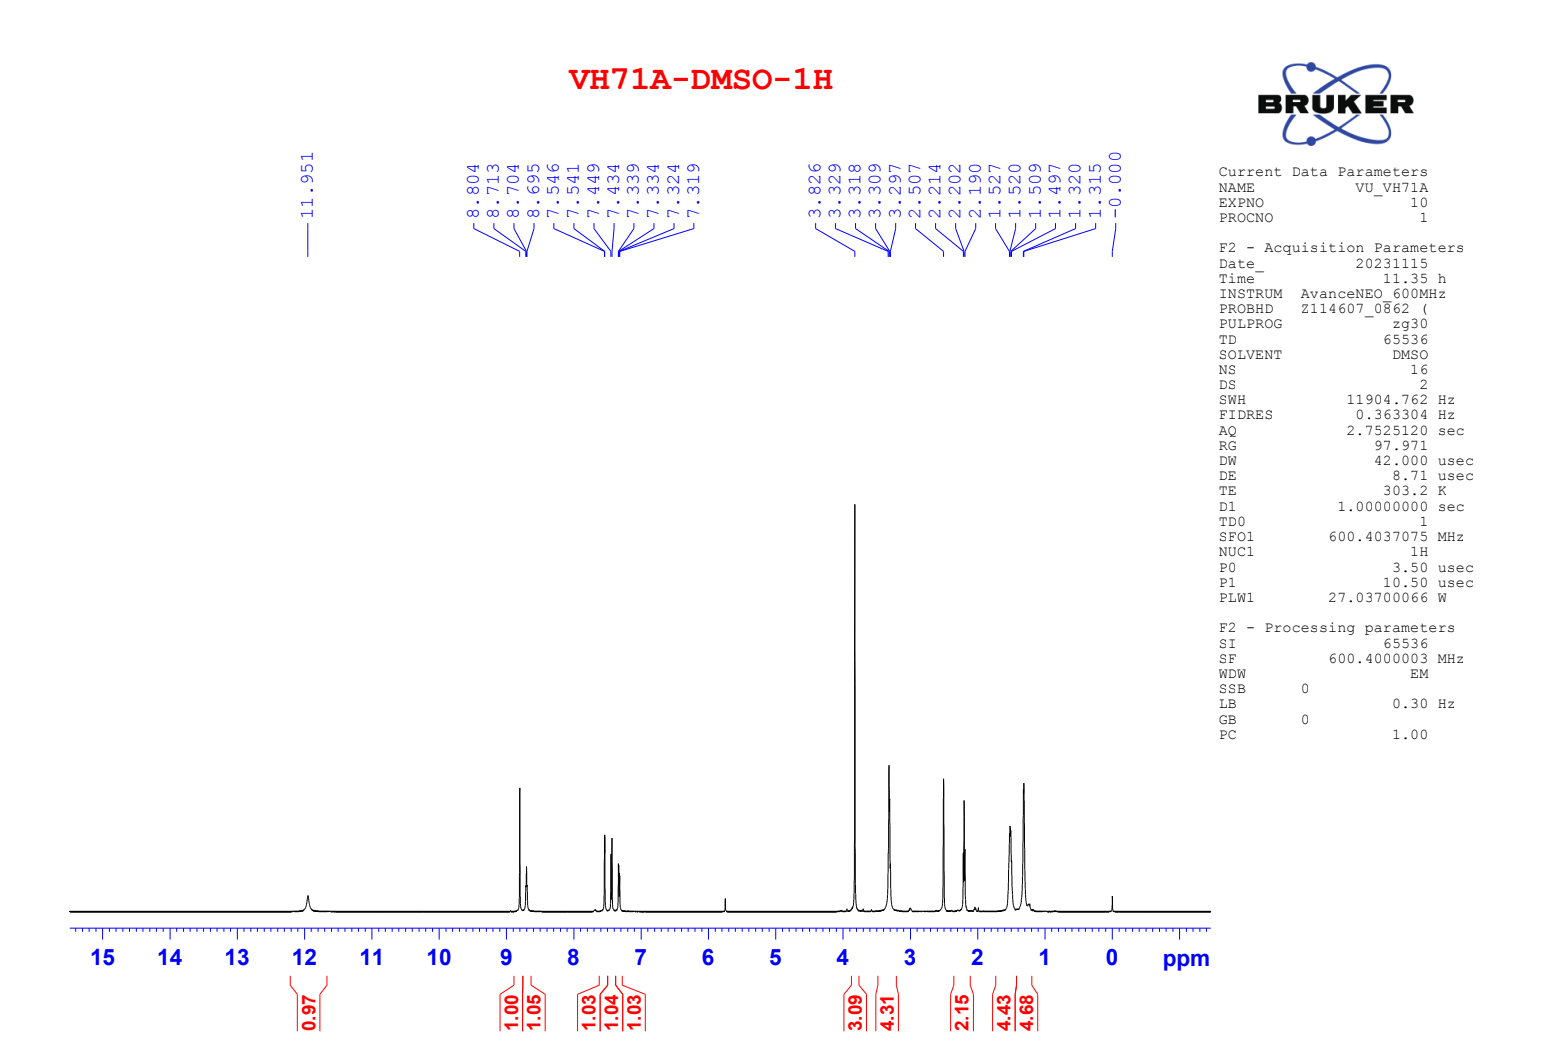
**

**Figure S14. 13C NMR of compound 3g**

**
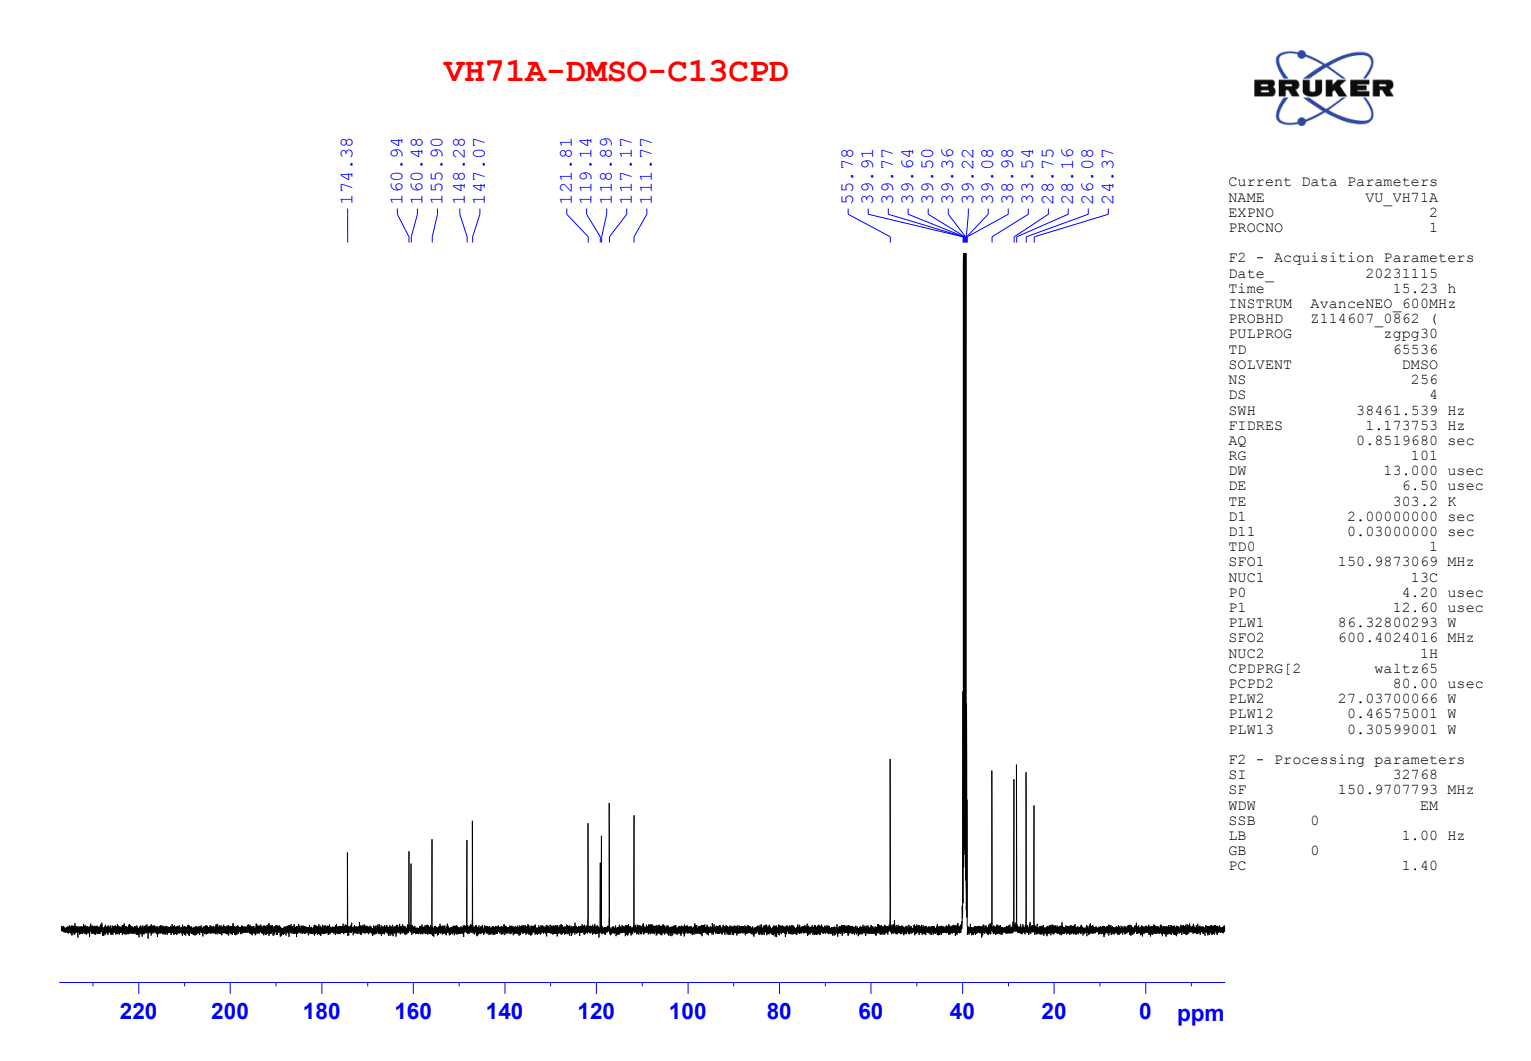
**

**Figure S15. 1H NMR of compound 4a**


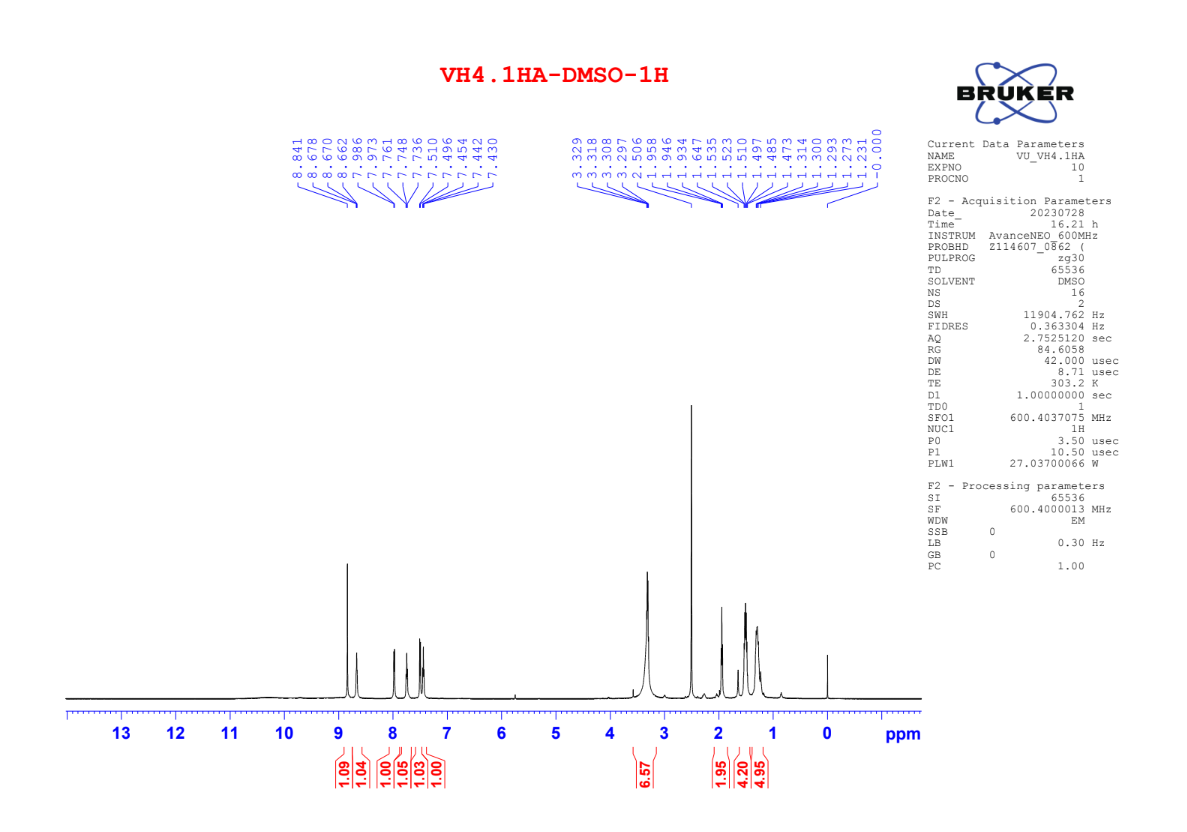


**Figure S16. 13C NMR of compound 4a**


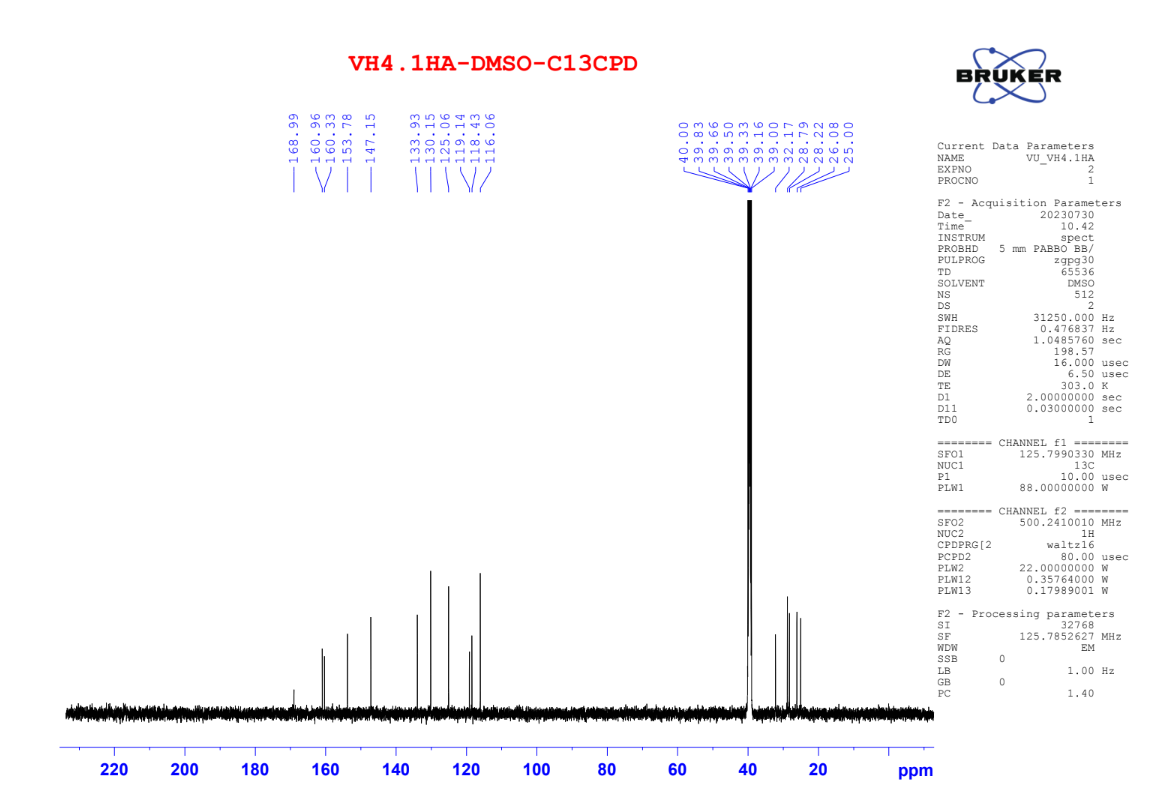


**Figure S17. HRMS of compound 4a**

**
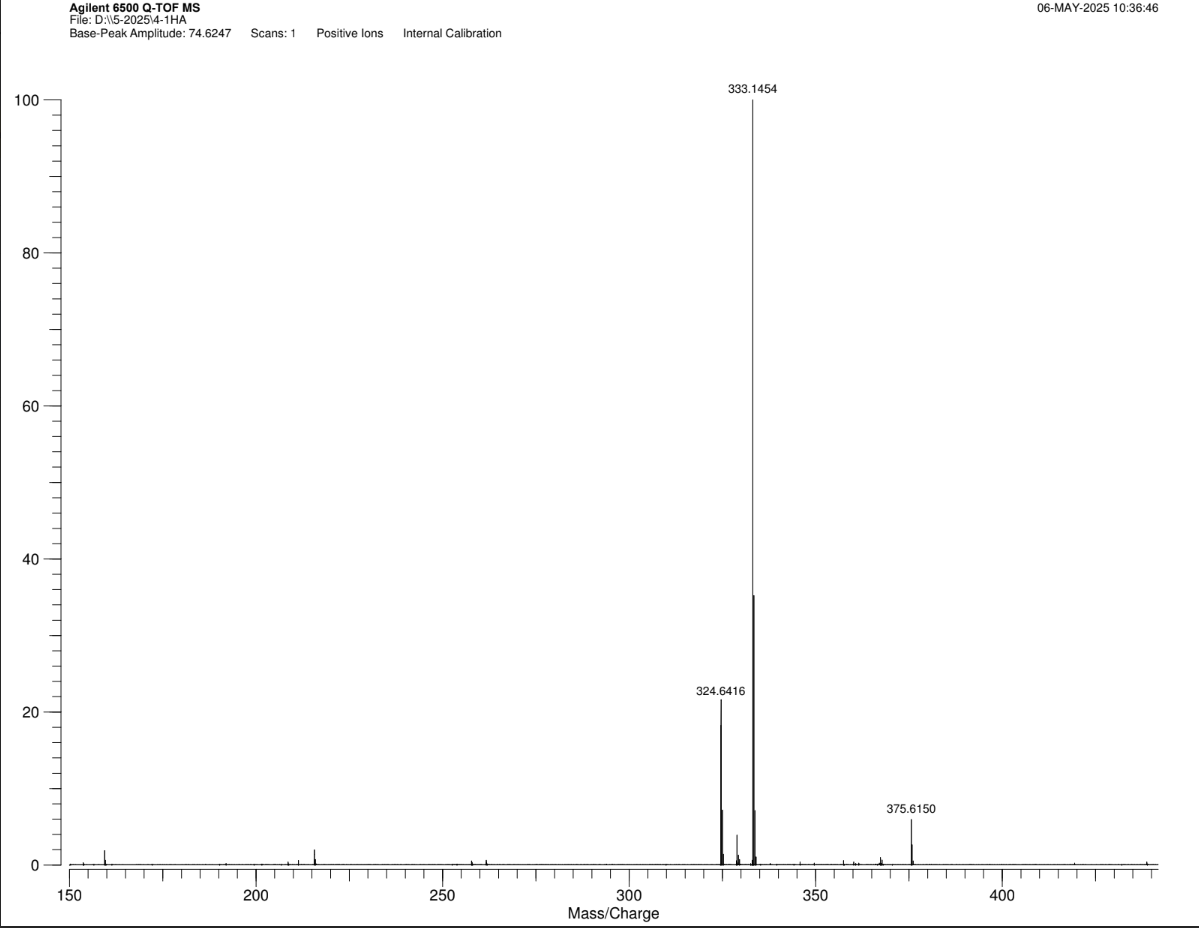
**

**Figure S18. 1H NMR of compound 4b**


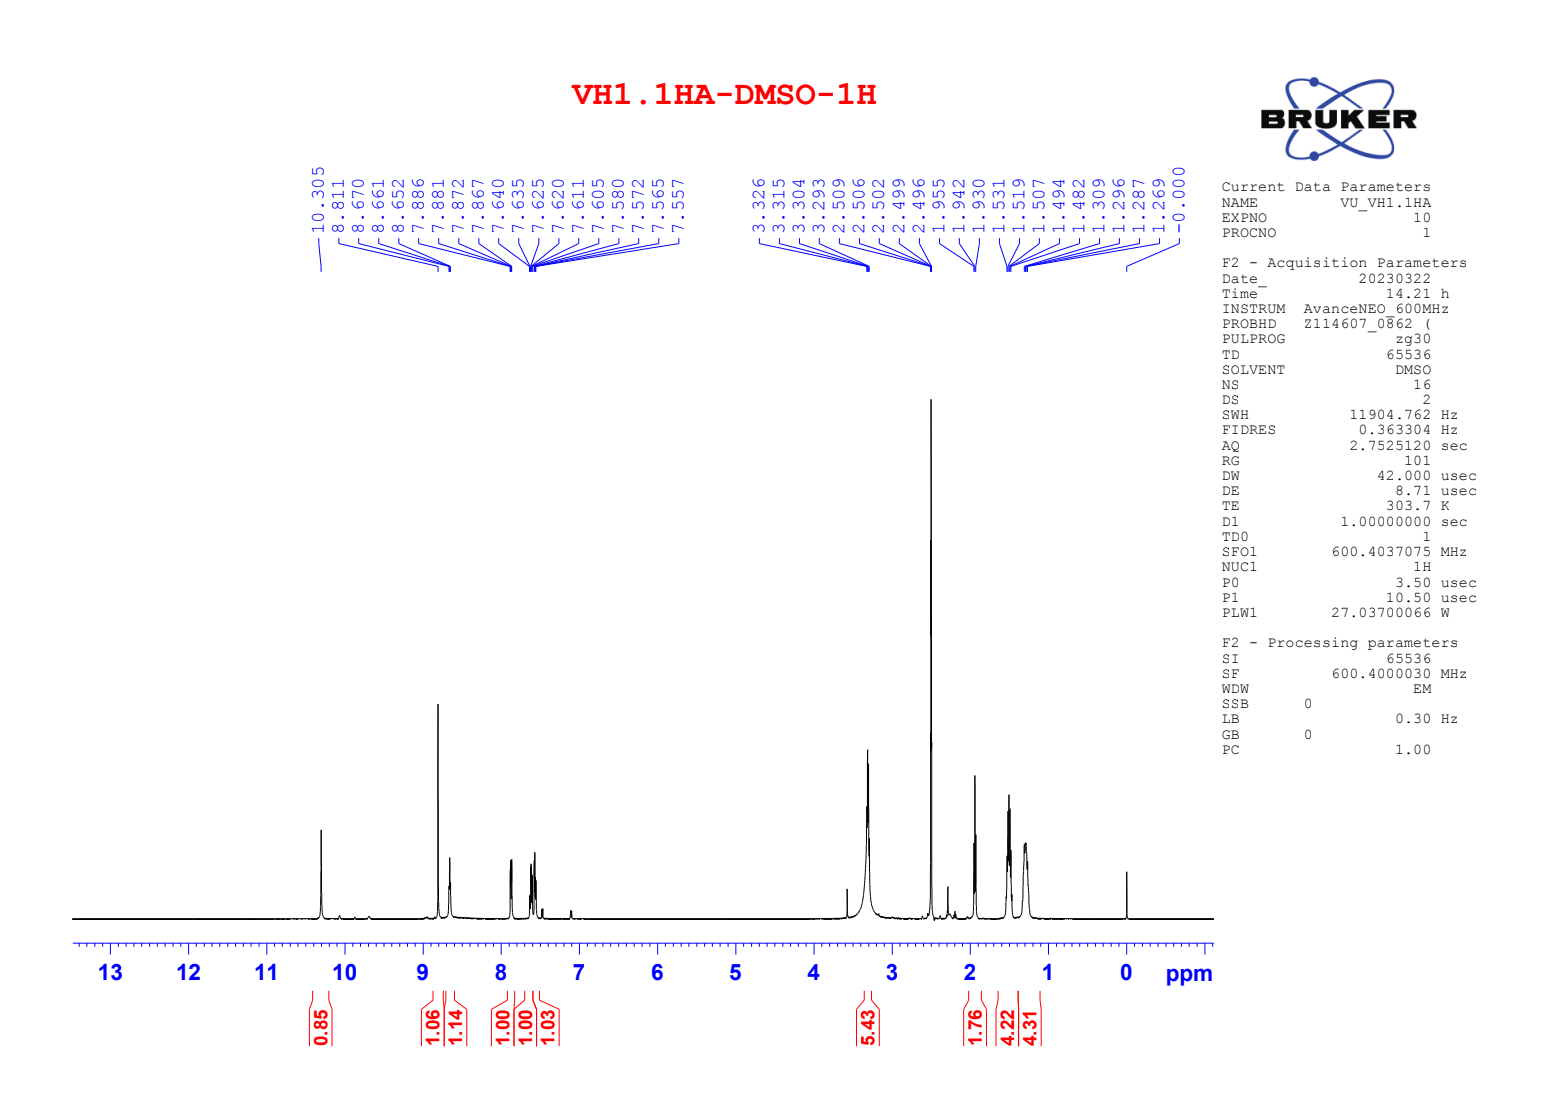


**Figure S19. 13C NMR of compound 4b**


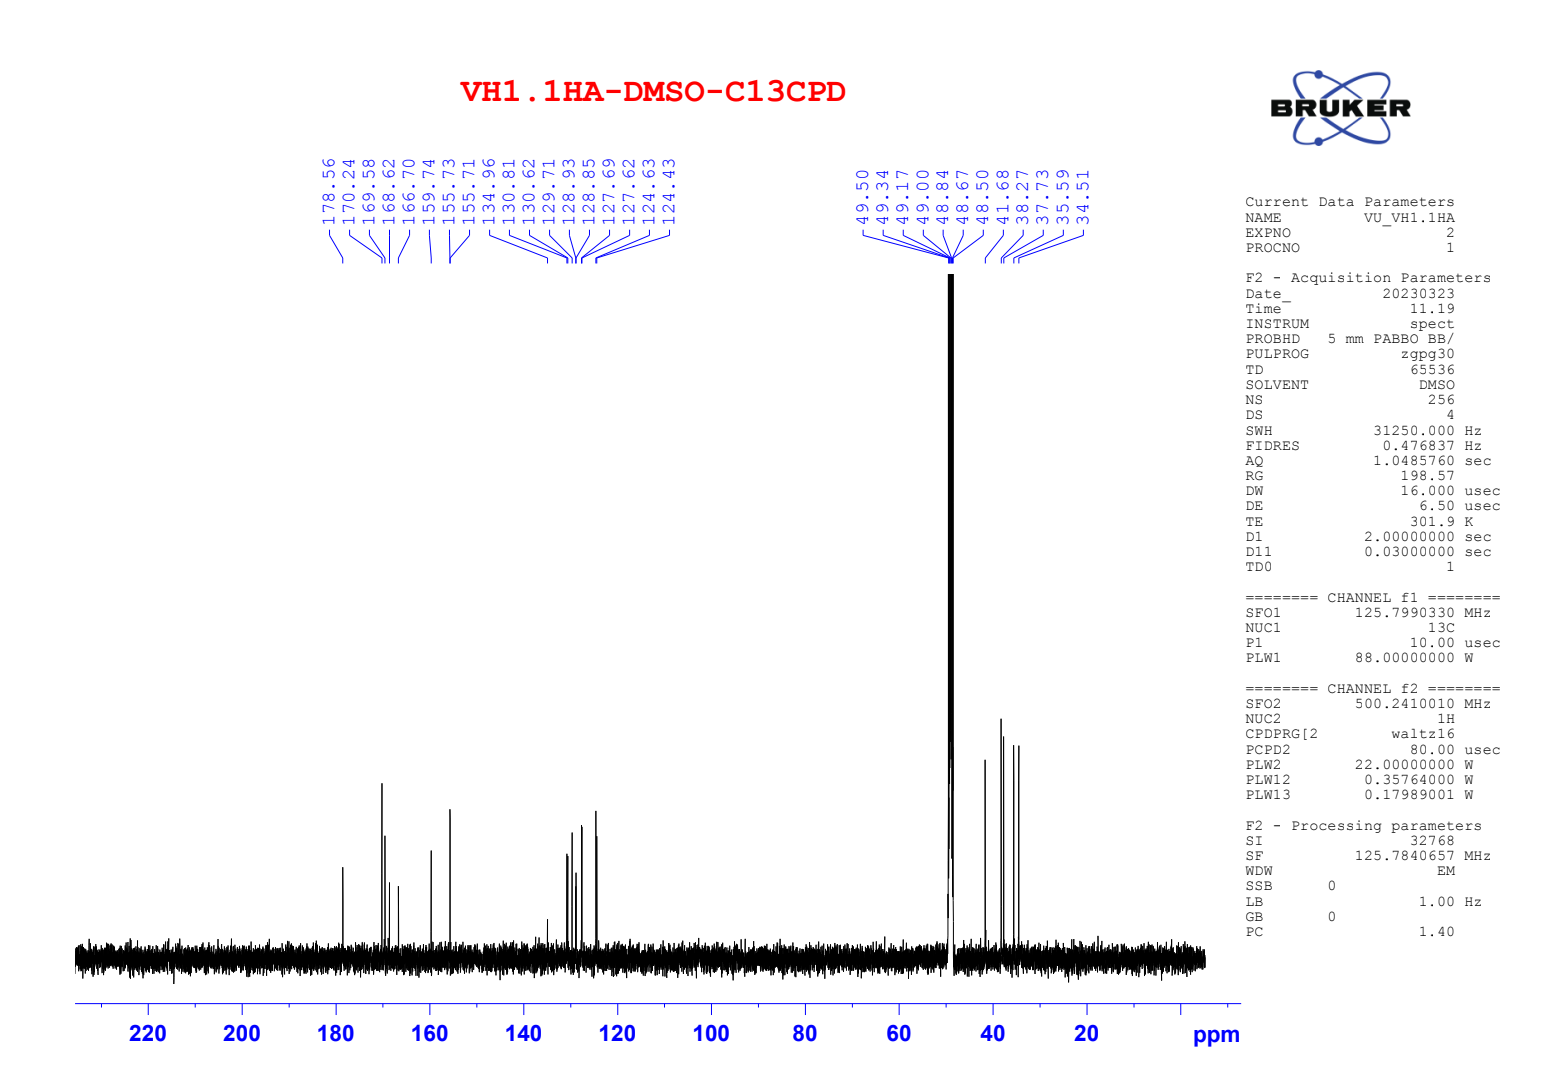


**Figure S20. HRMS of compound 4b**

**
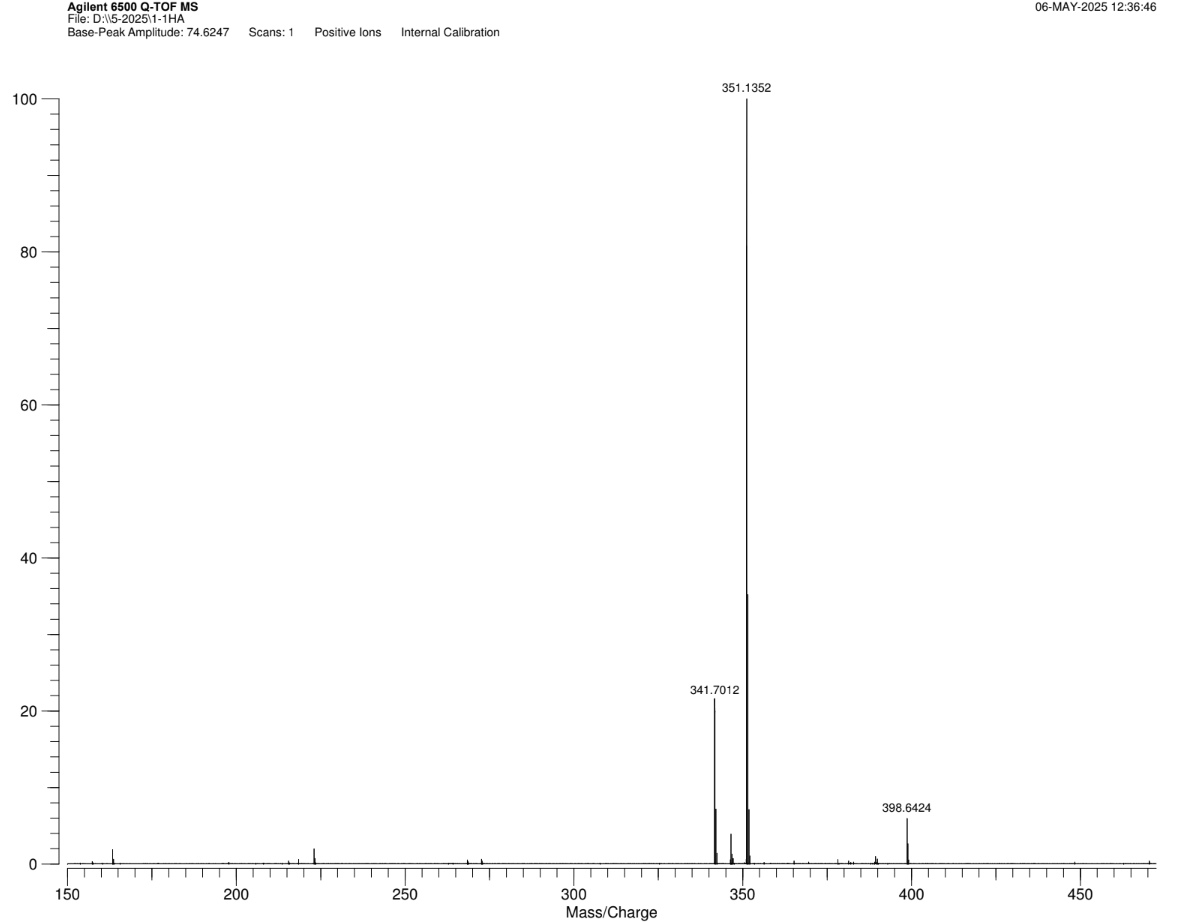
**

**Figure S21. 1H NMR of compound 4c**


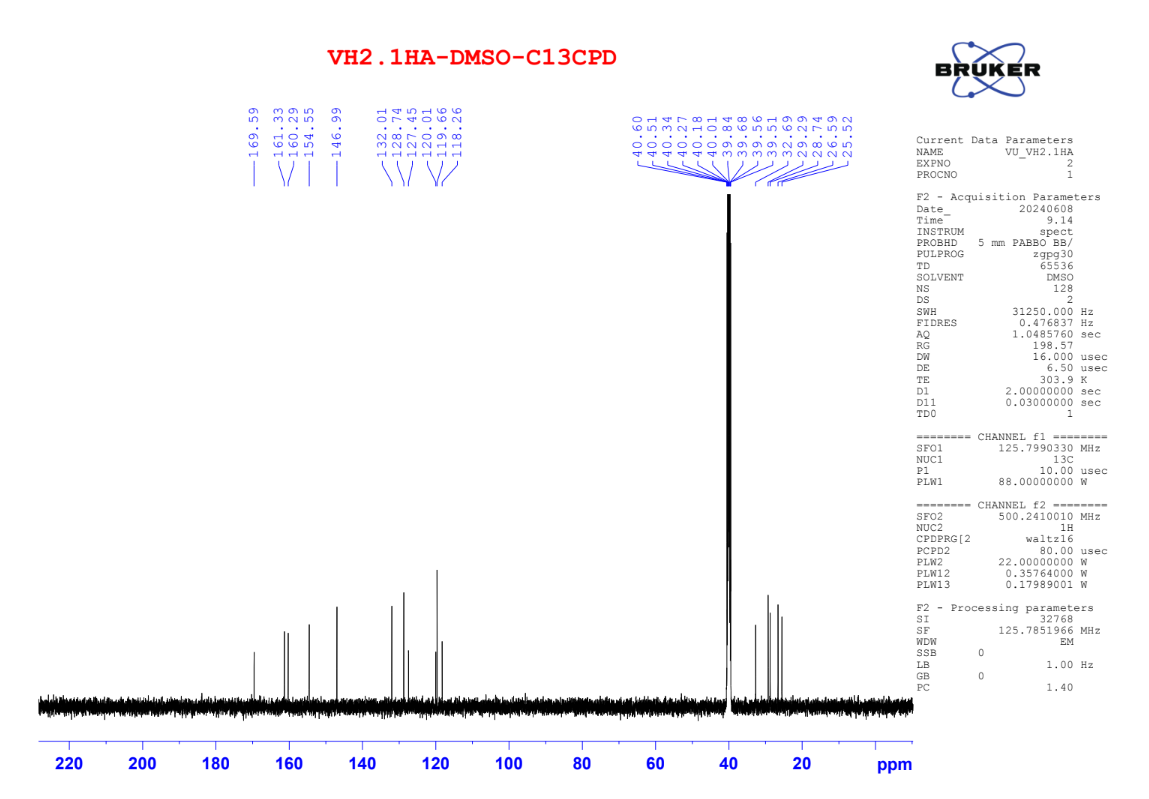


**Figure S22. 13C NMR of compound 4c**


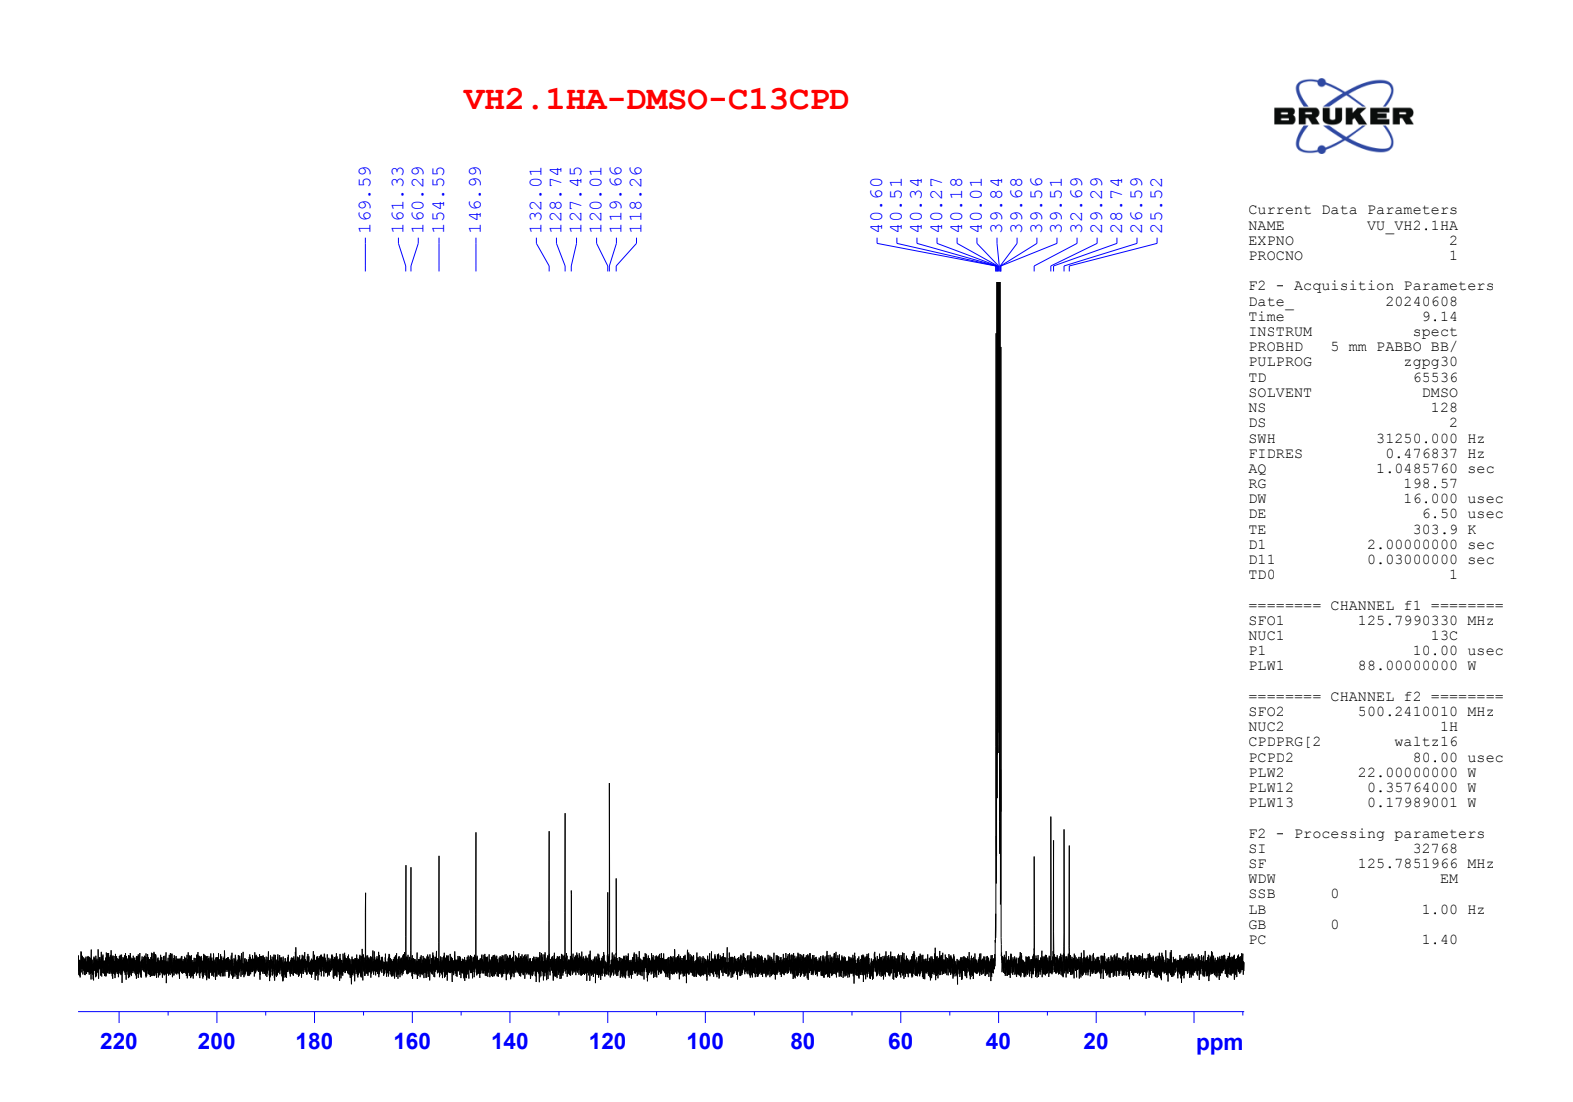


**Figure S23. 1H NMR of compound 4d**


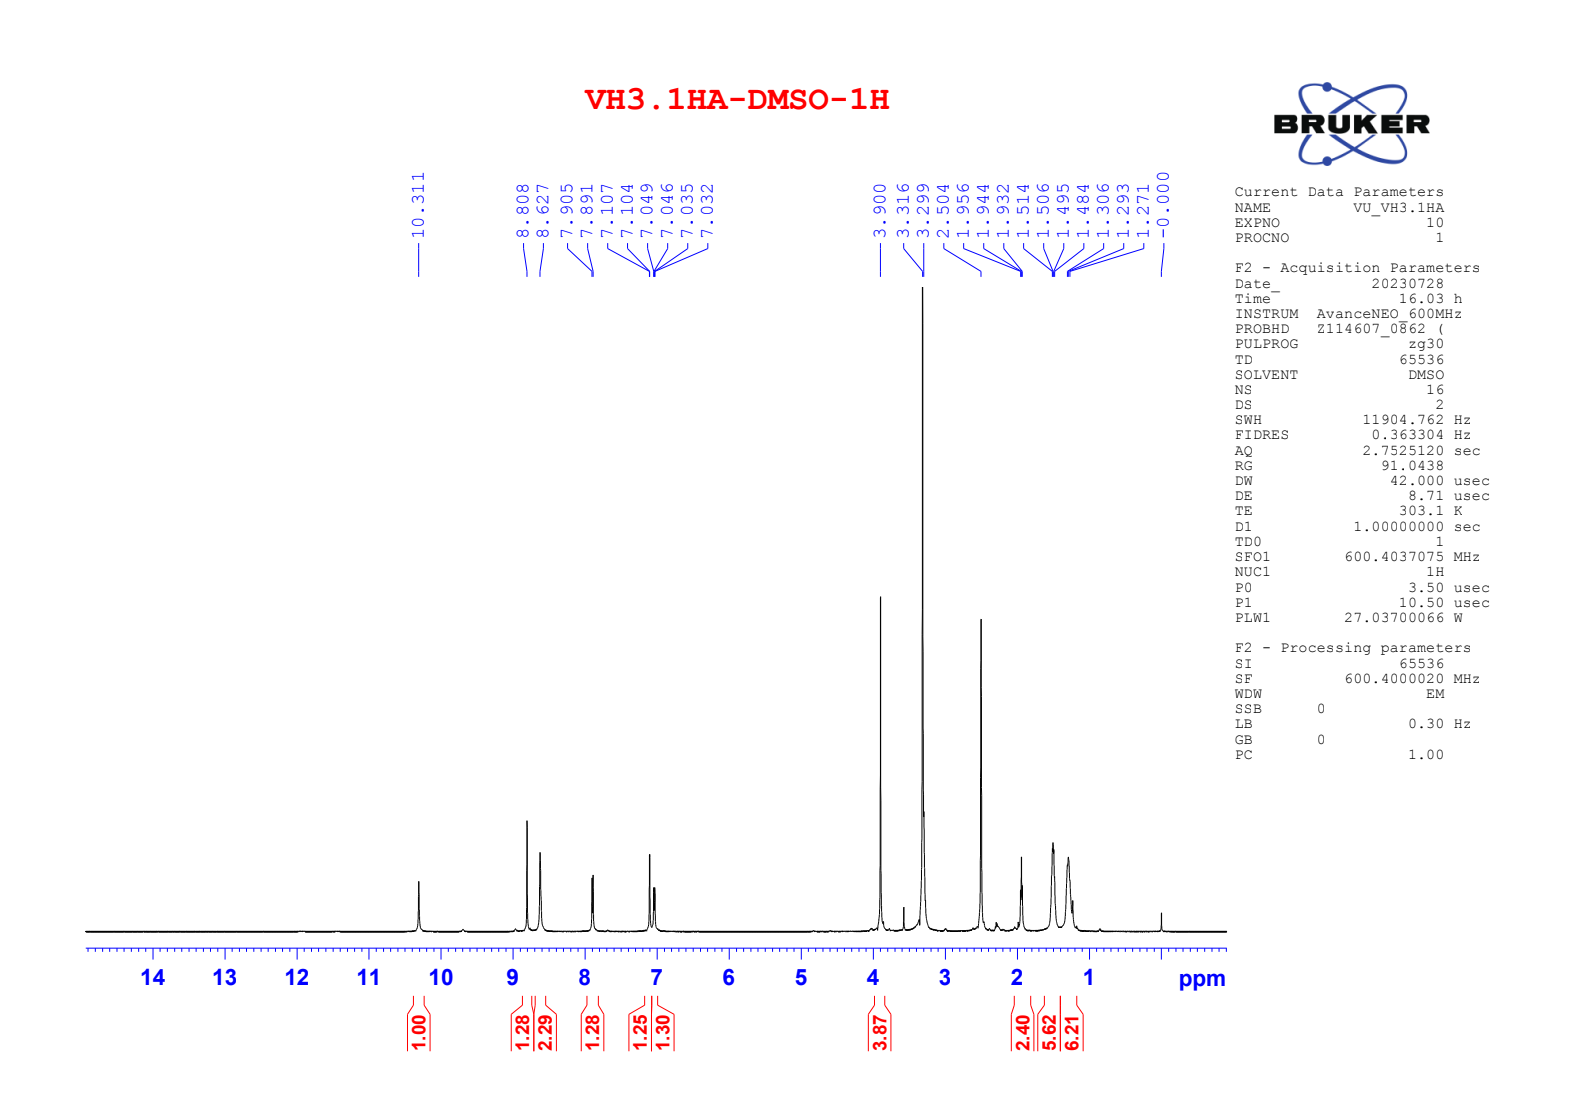


**Figure S24. 13C NMR of compound 4d**


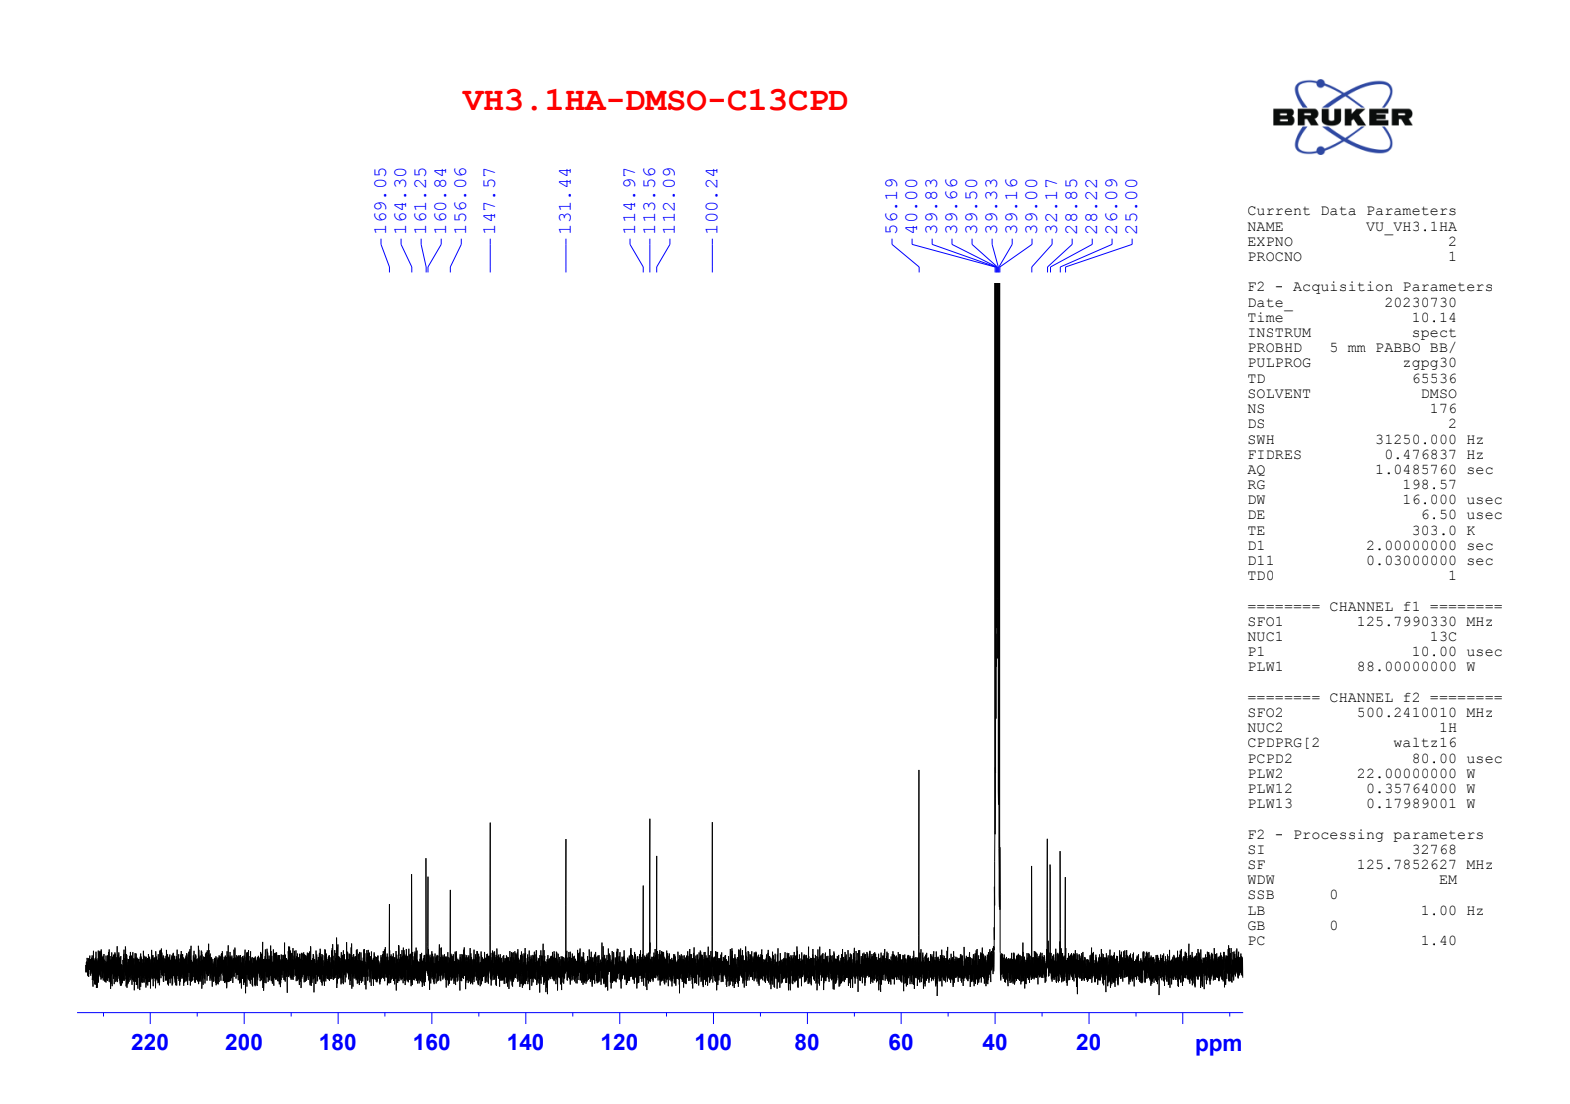


**Figure S25. 1H NMR of compound 4e**


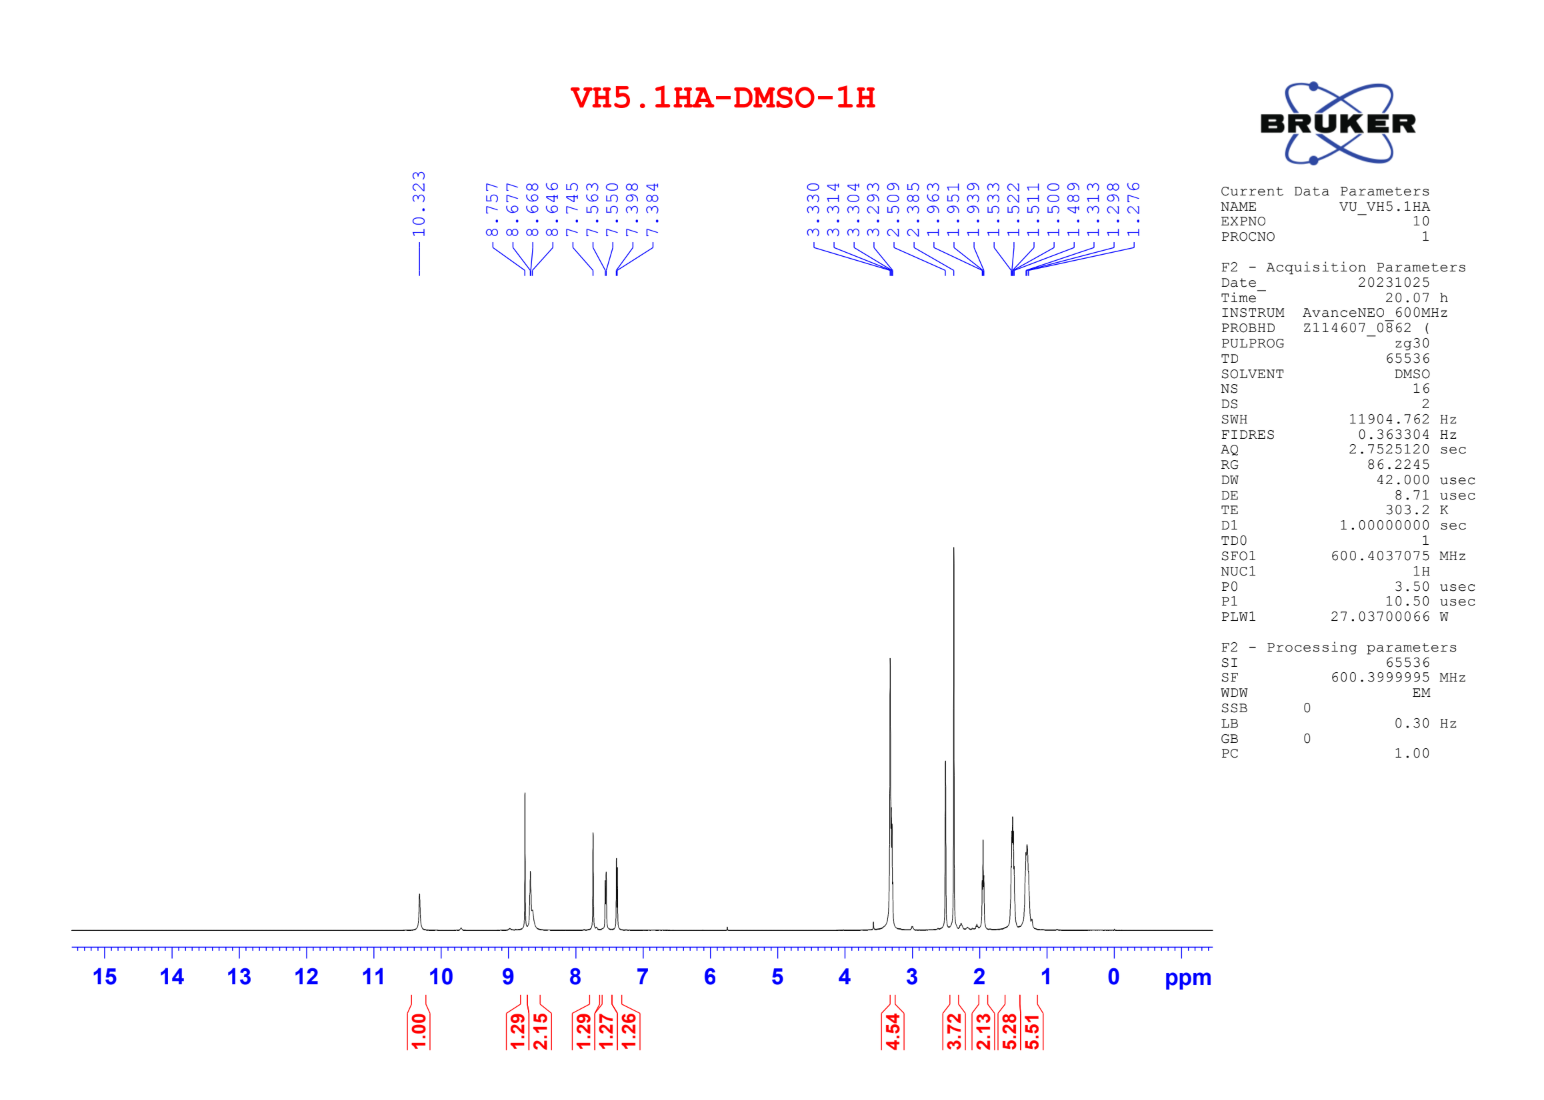


**Figure S26. 13C NMR of compound 4e**


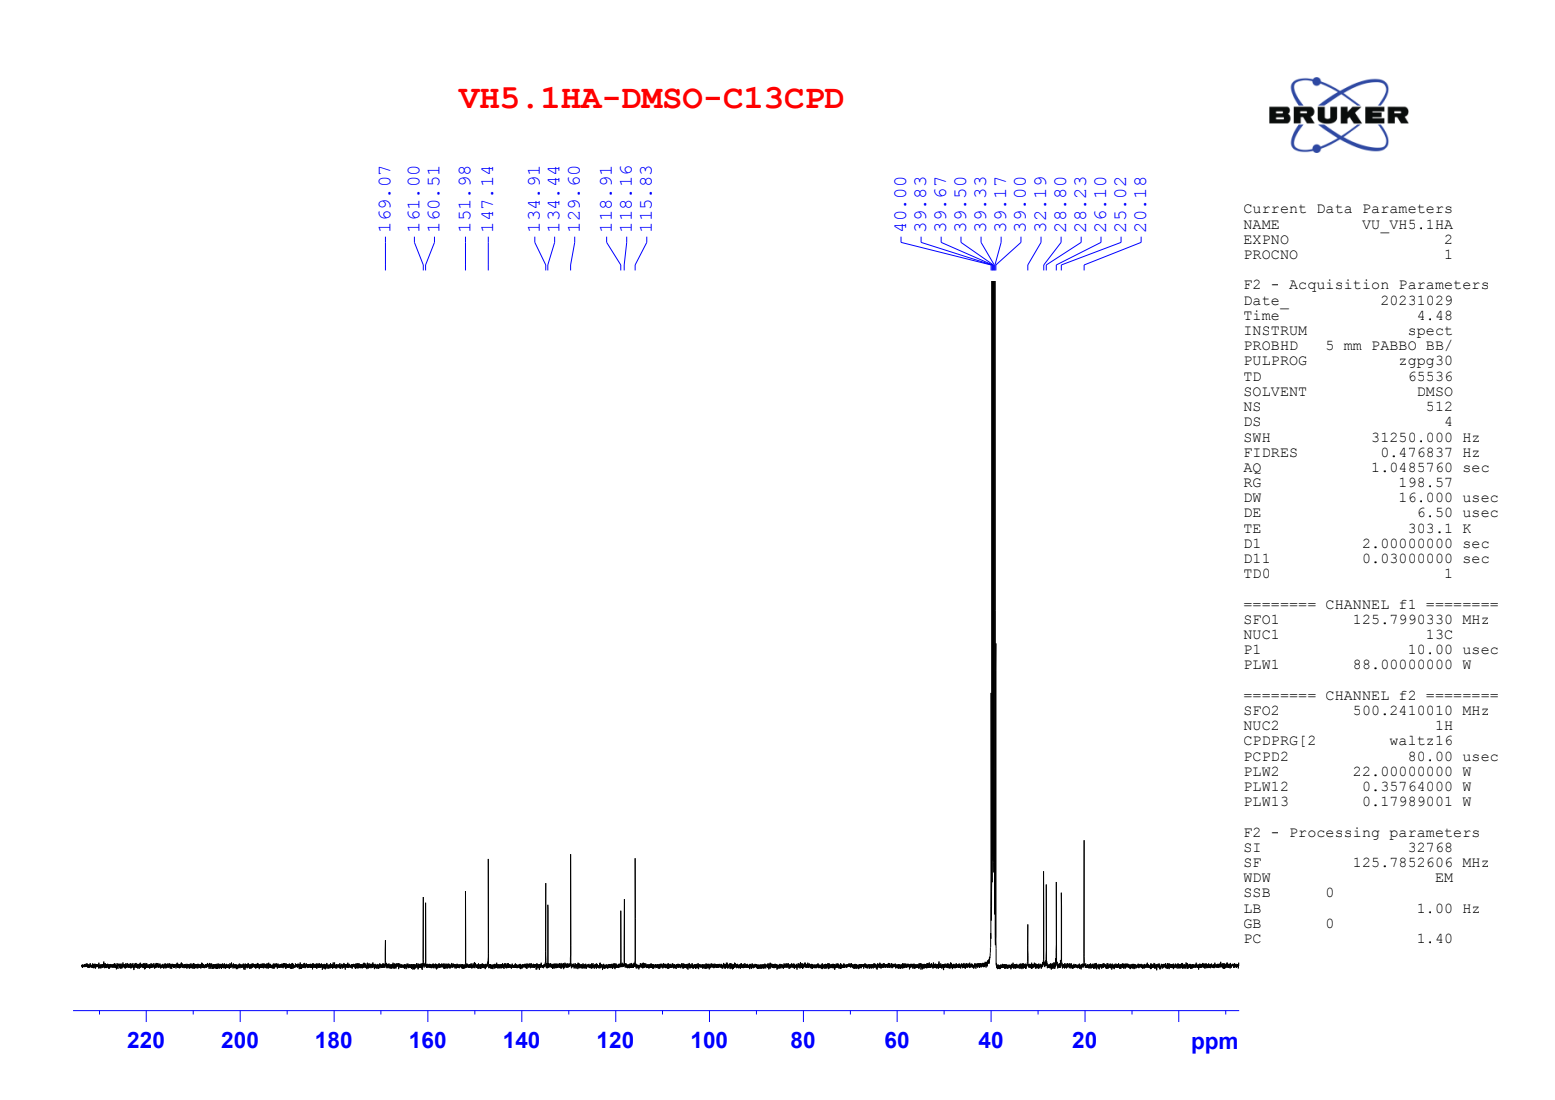


**Figure S27. HRMS of compound 4e**


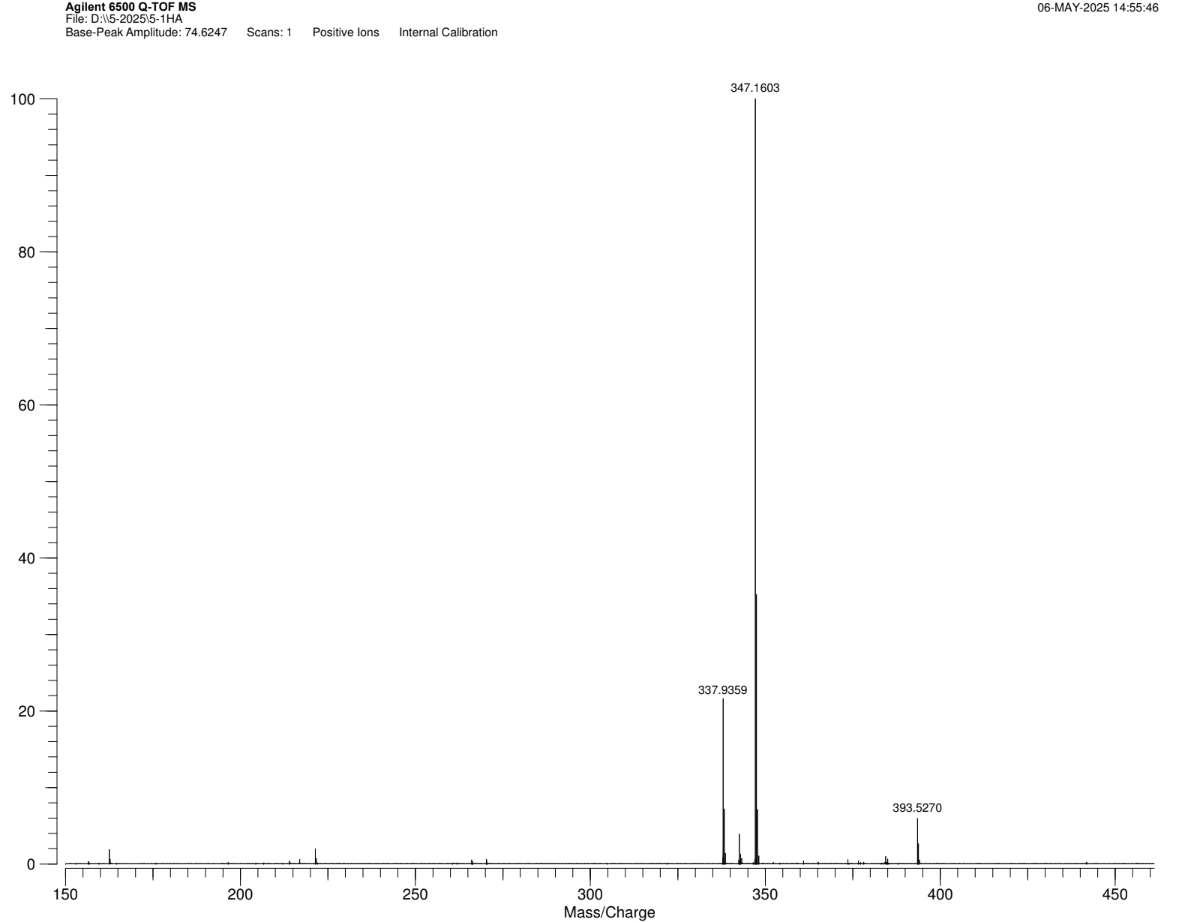


**Figure S28. 1H NMR of compound 4f**


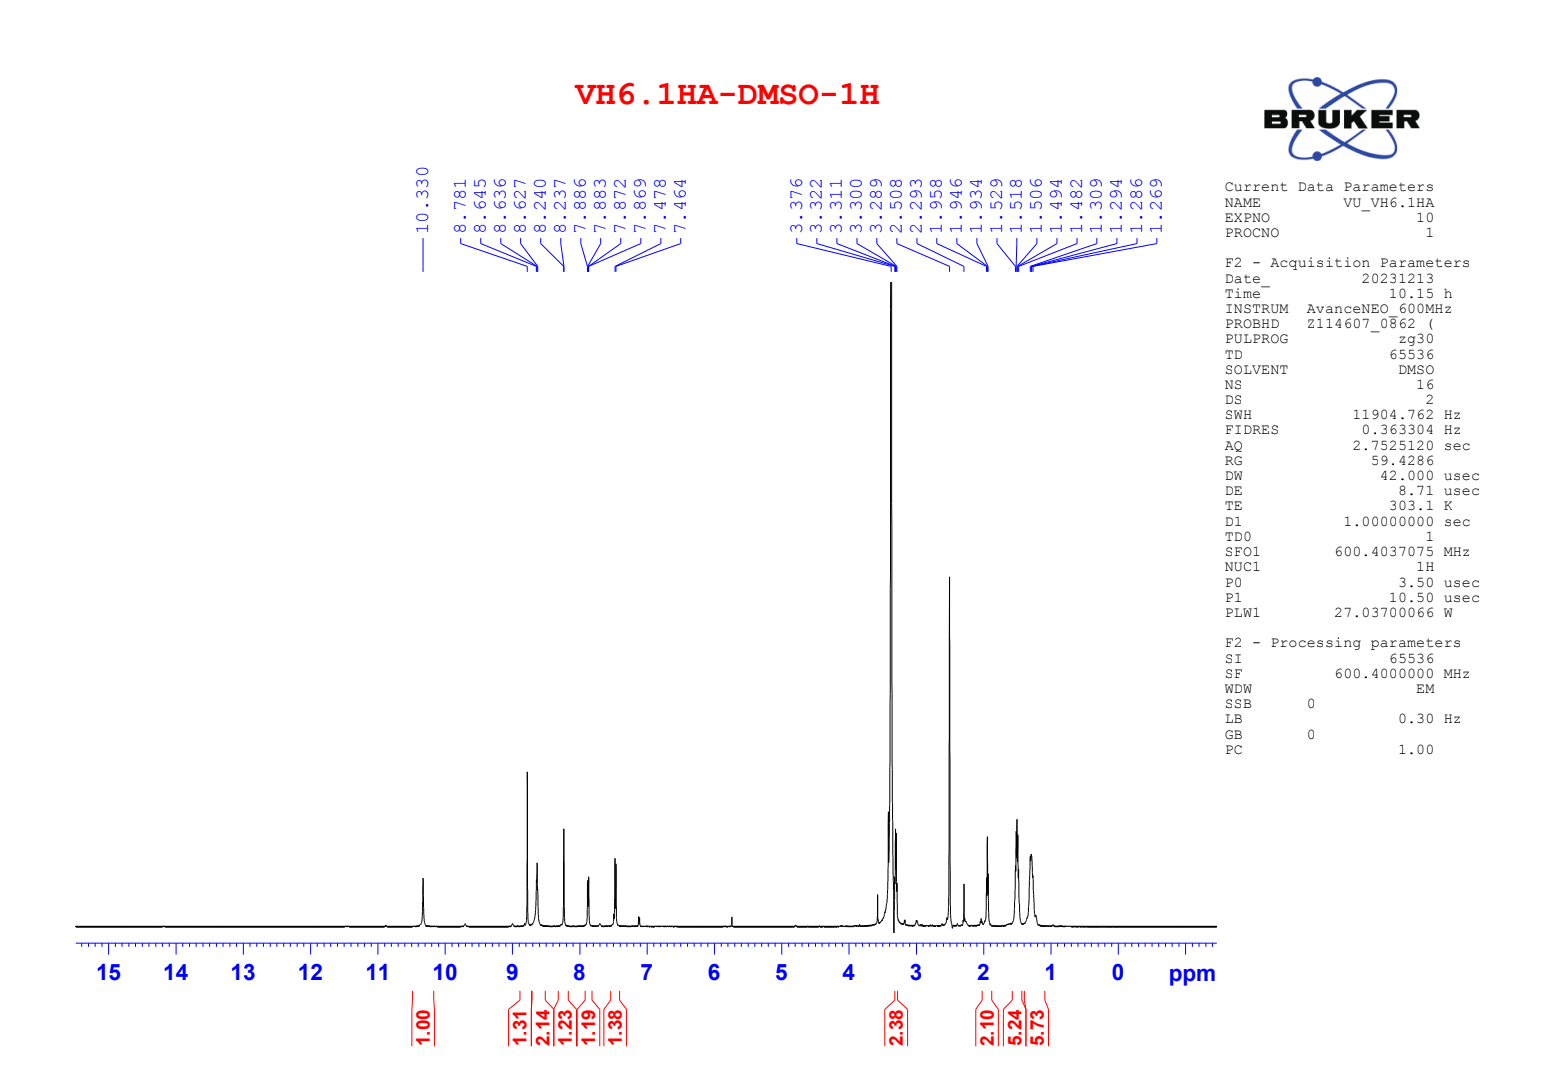


**Figure S29. 13C NMR of compound 4f**


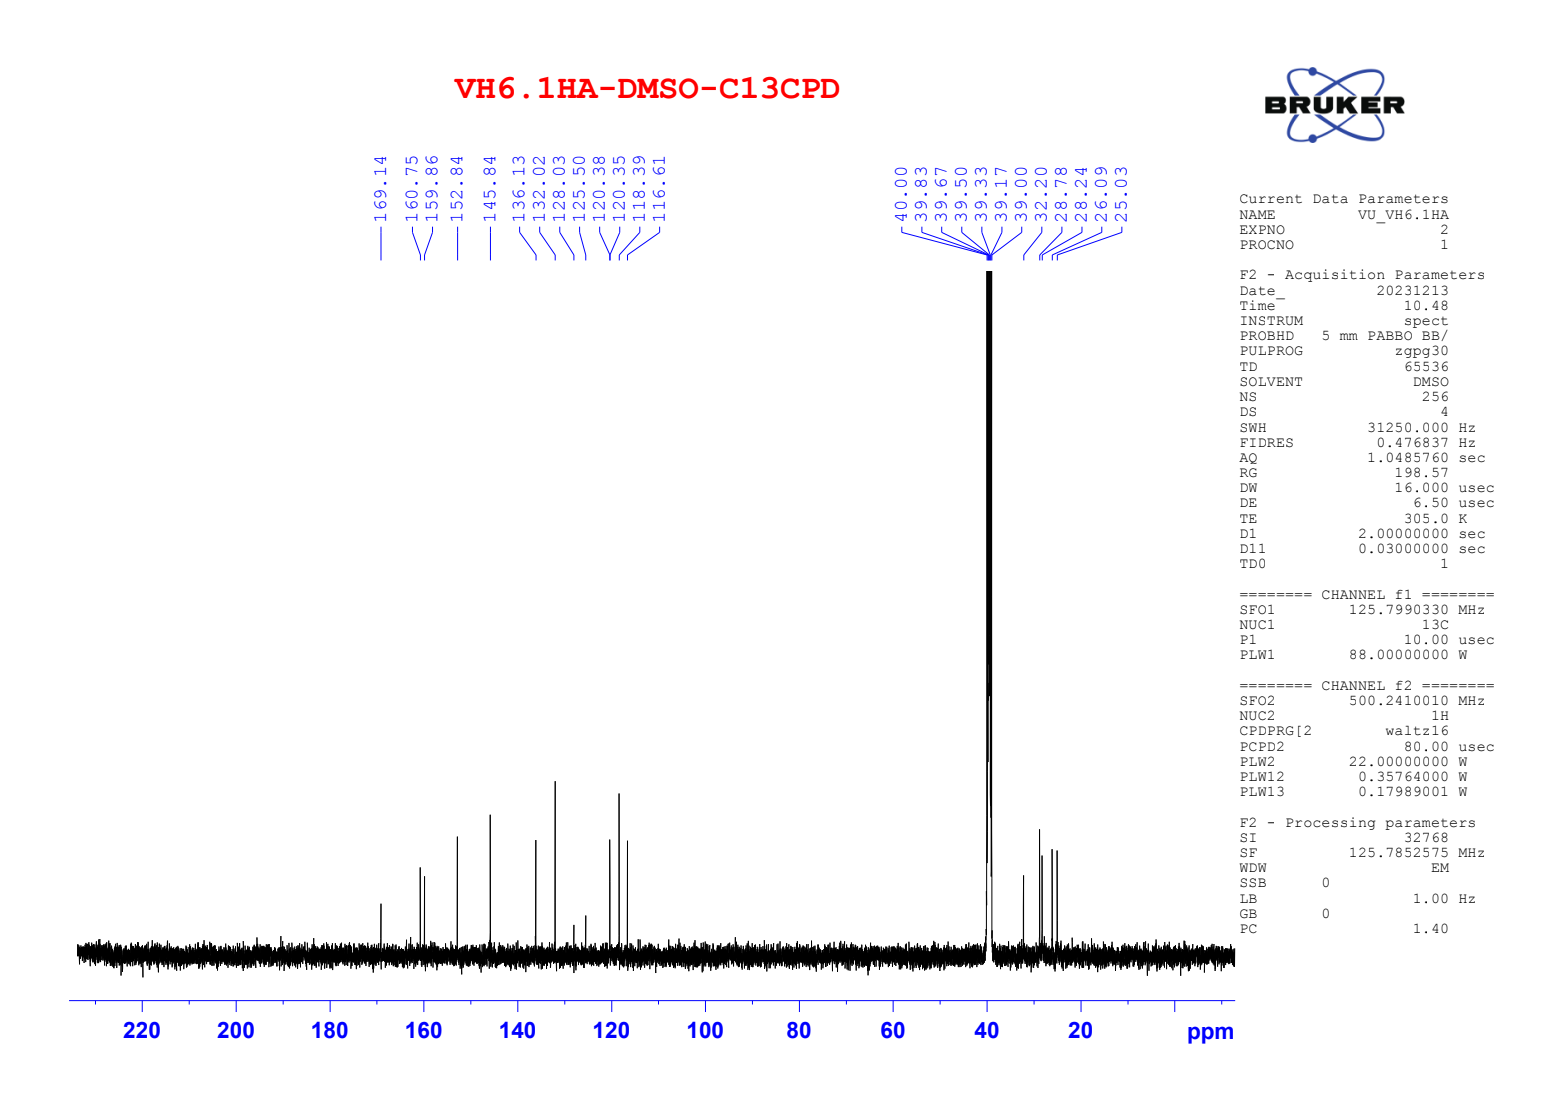


**Figure S30. HRMS of compound 4f**


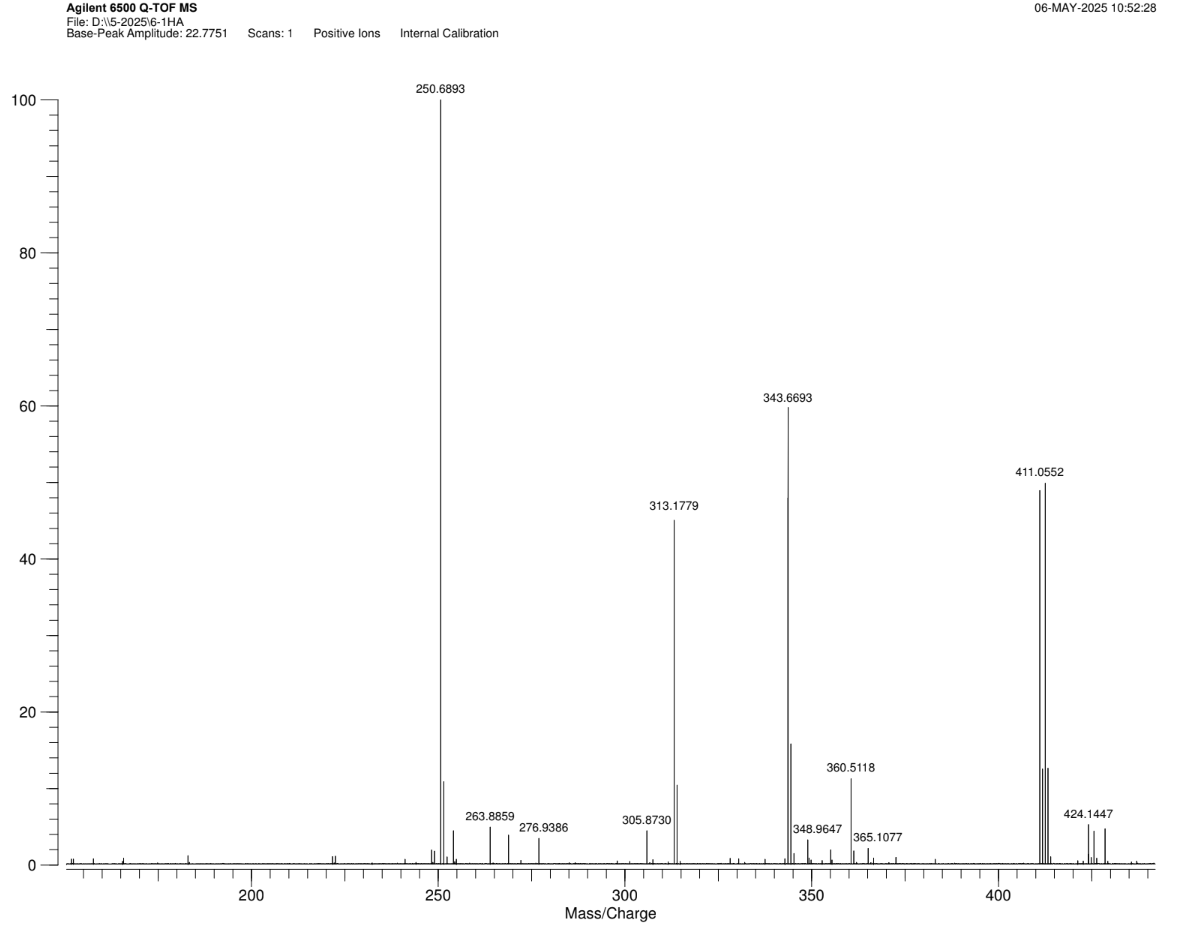


**Figure S31. 1H NMR of compound 4g**


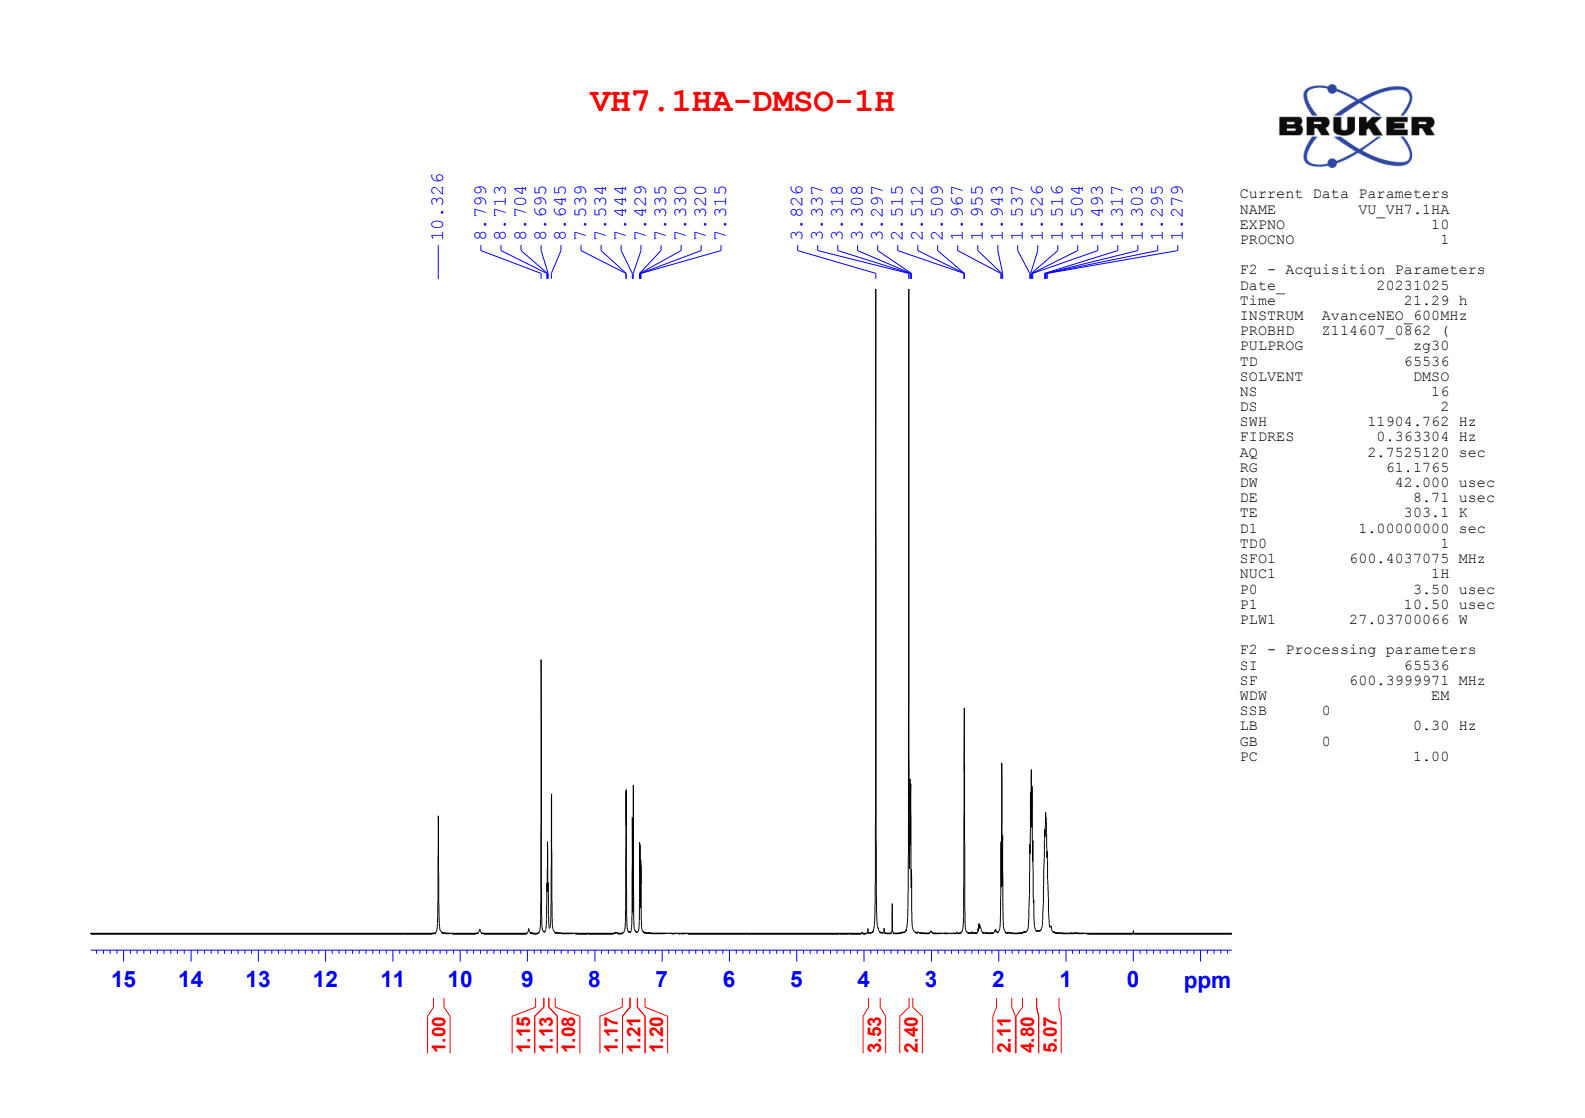


**S32. 13C NMR of compound 4g**


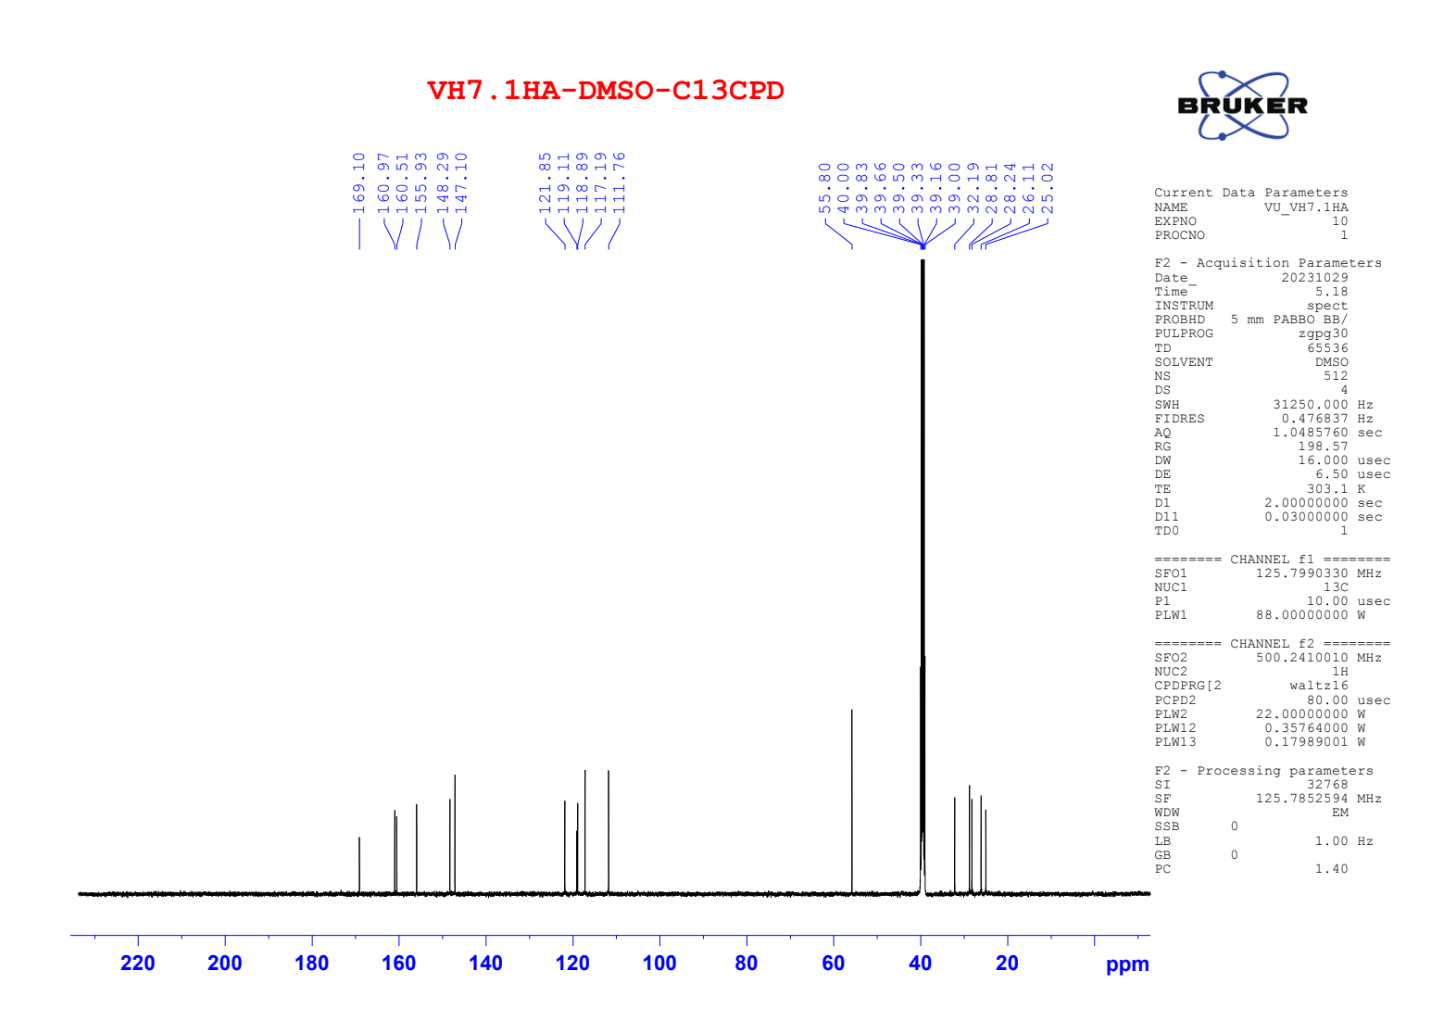


**Figure S33. HRMS of compound 4g**

**
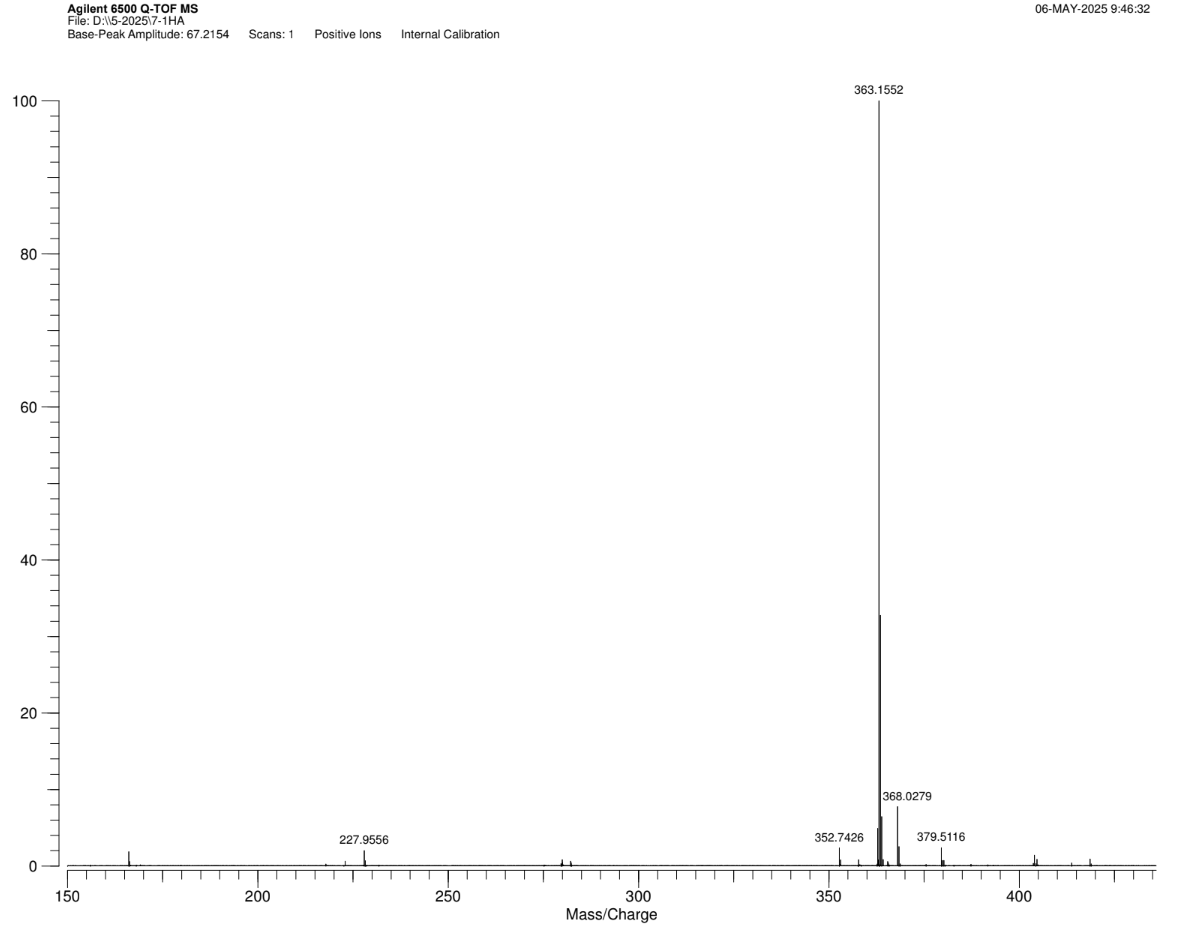
**

**Figure S34. 1H NMR of compound 5a**

**
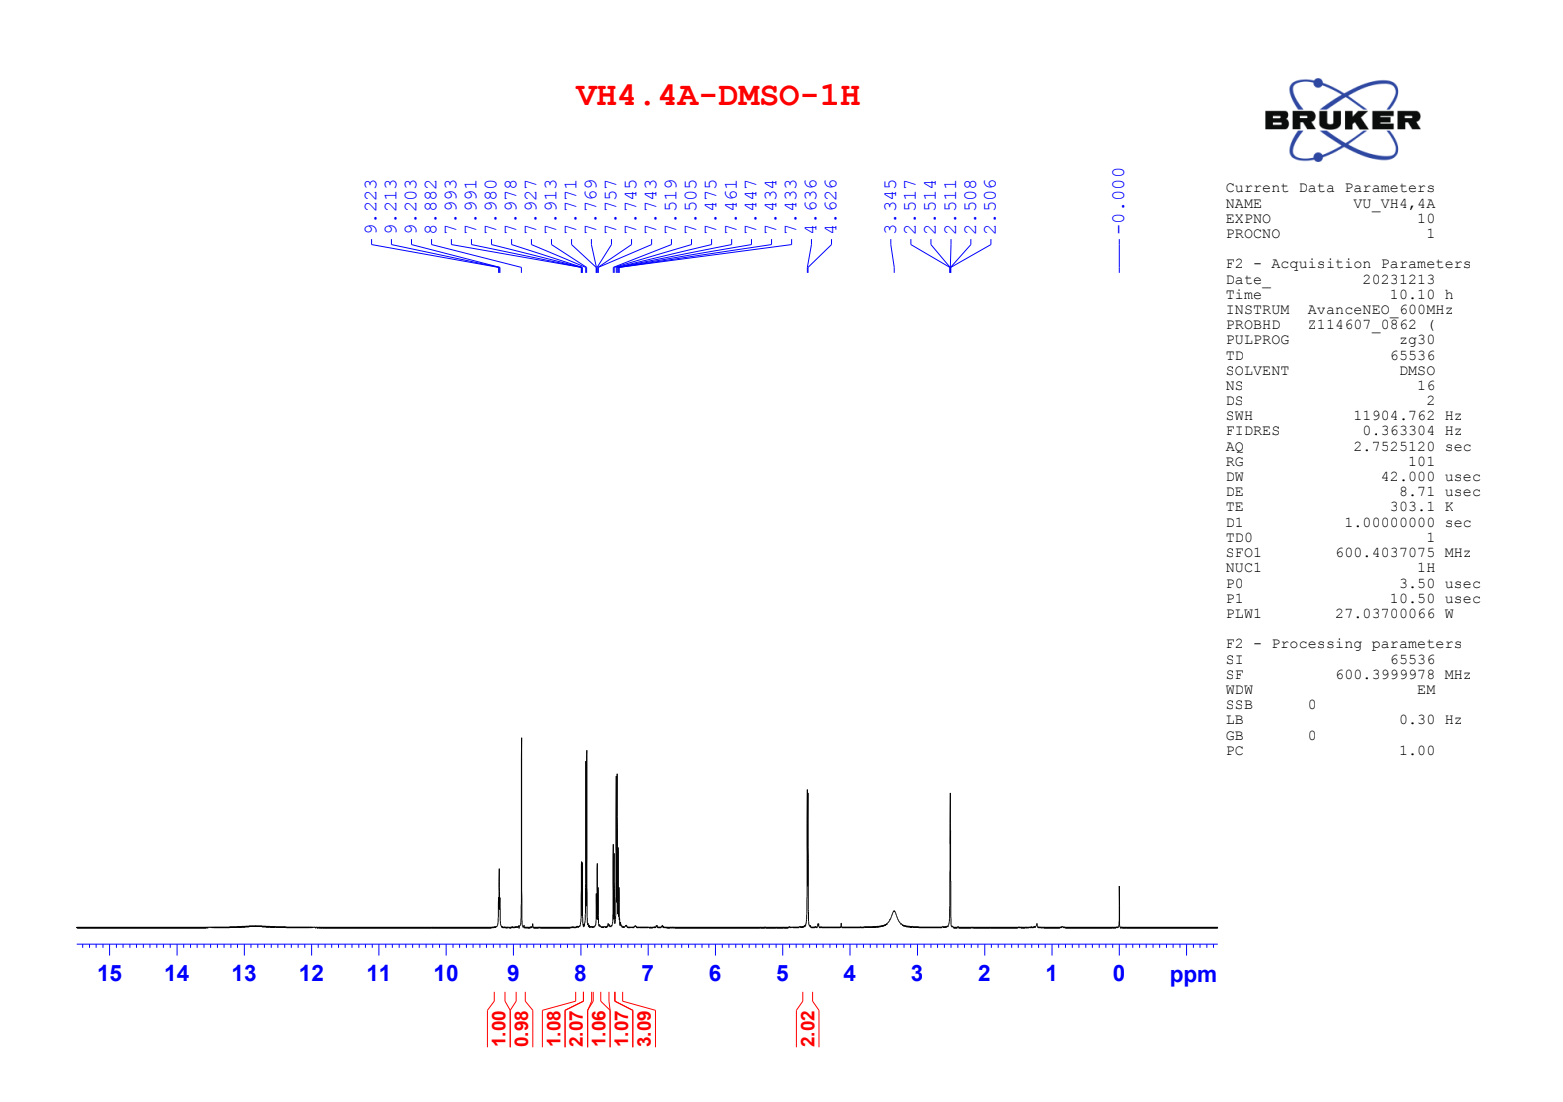
**

**Figure S35. 13C NMR of compound 5a**


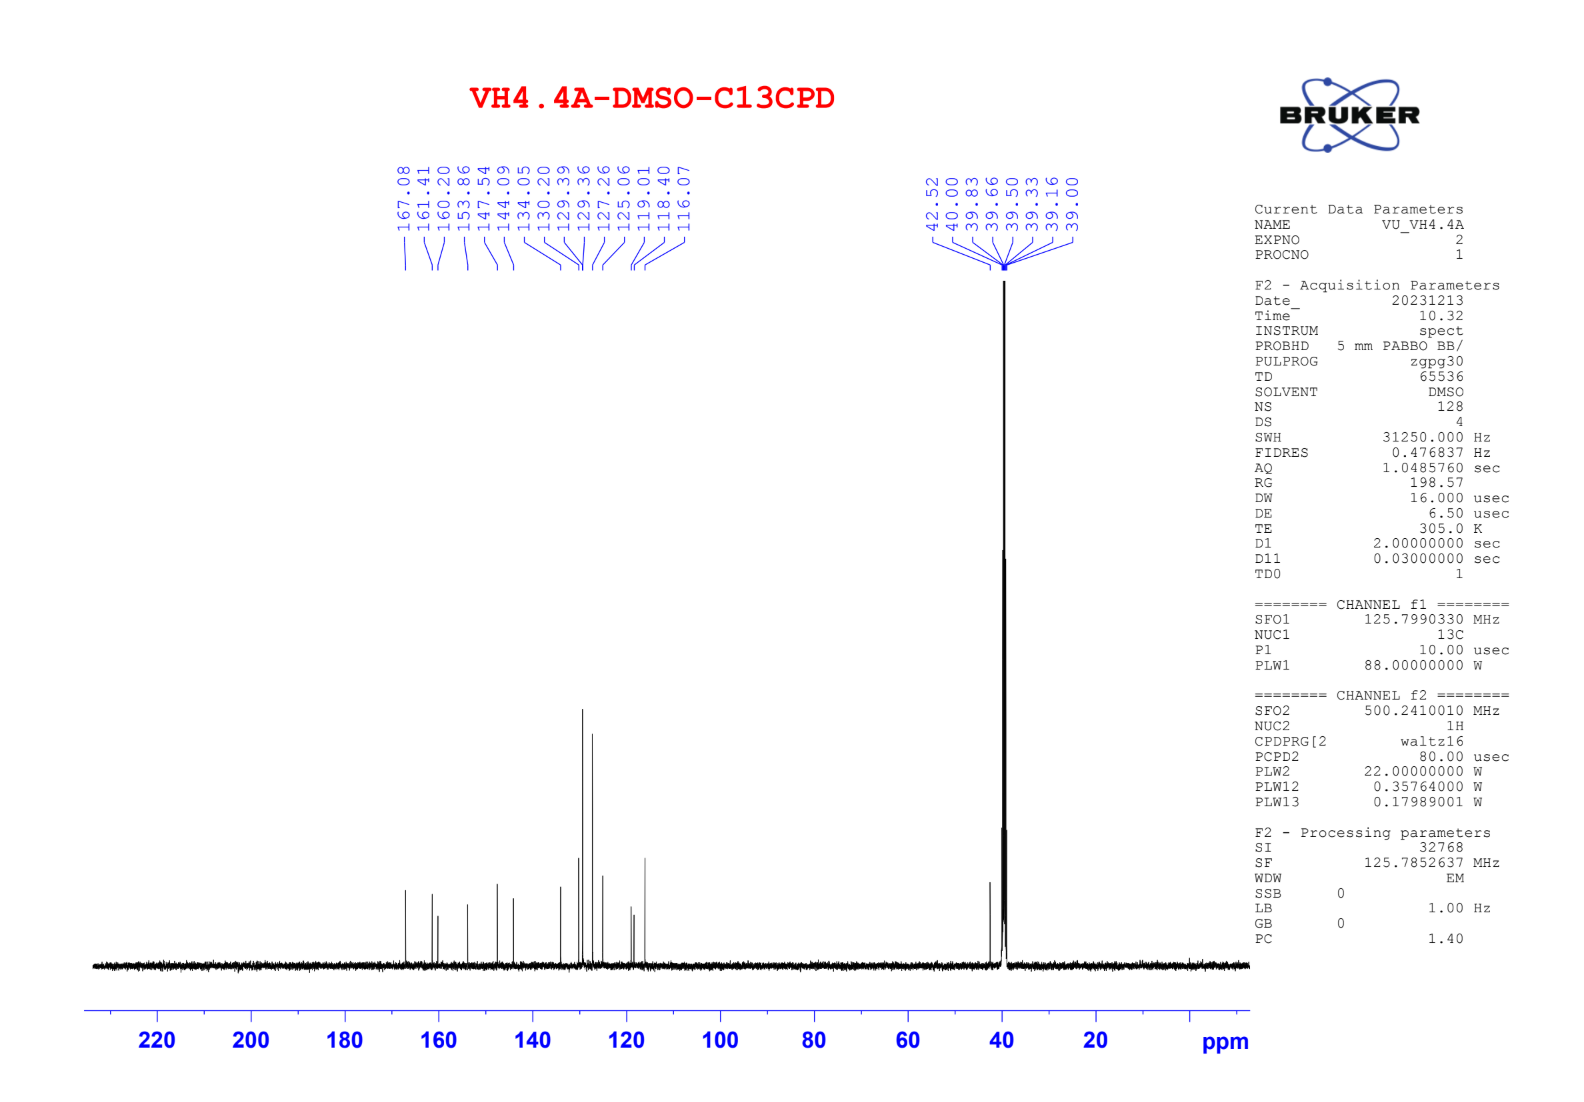


**Figure S36. 1H NMR of compound 5b**

**
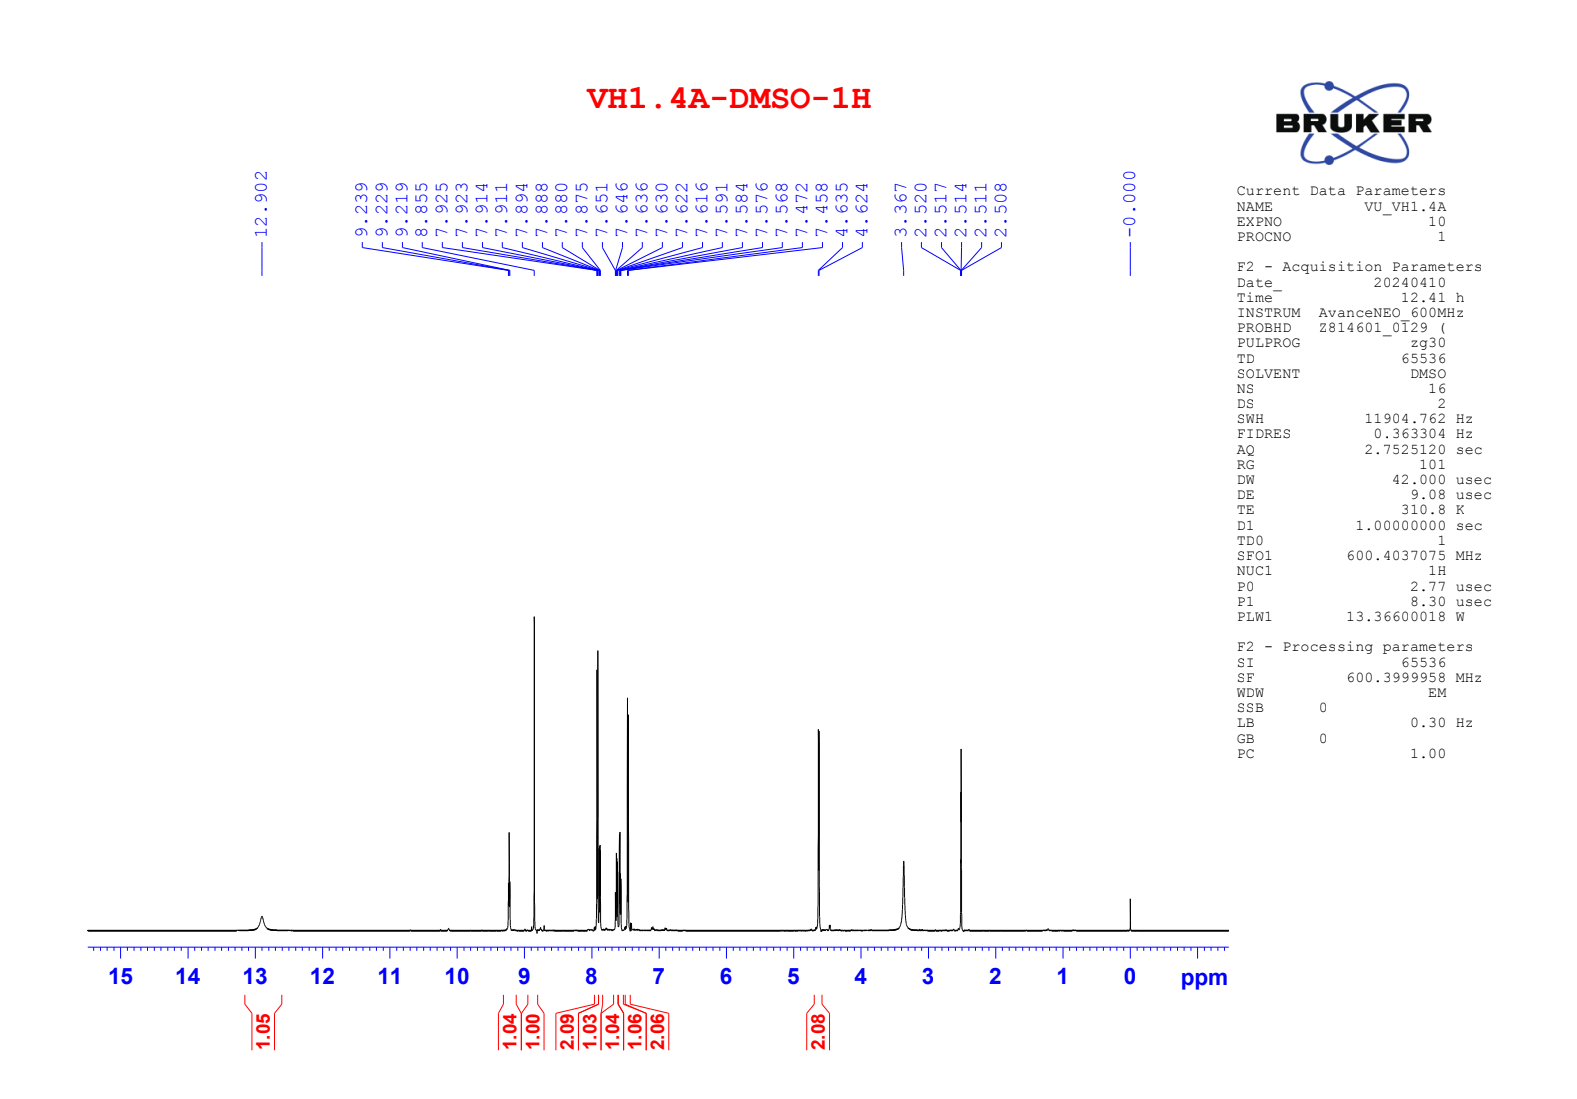
**

**Figure S37. 13C NMR of compound 5b**

**
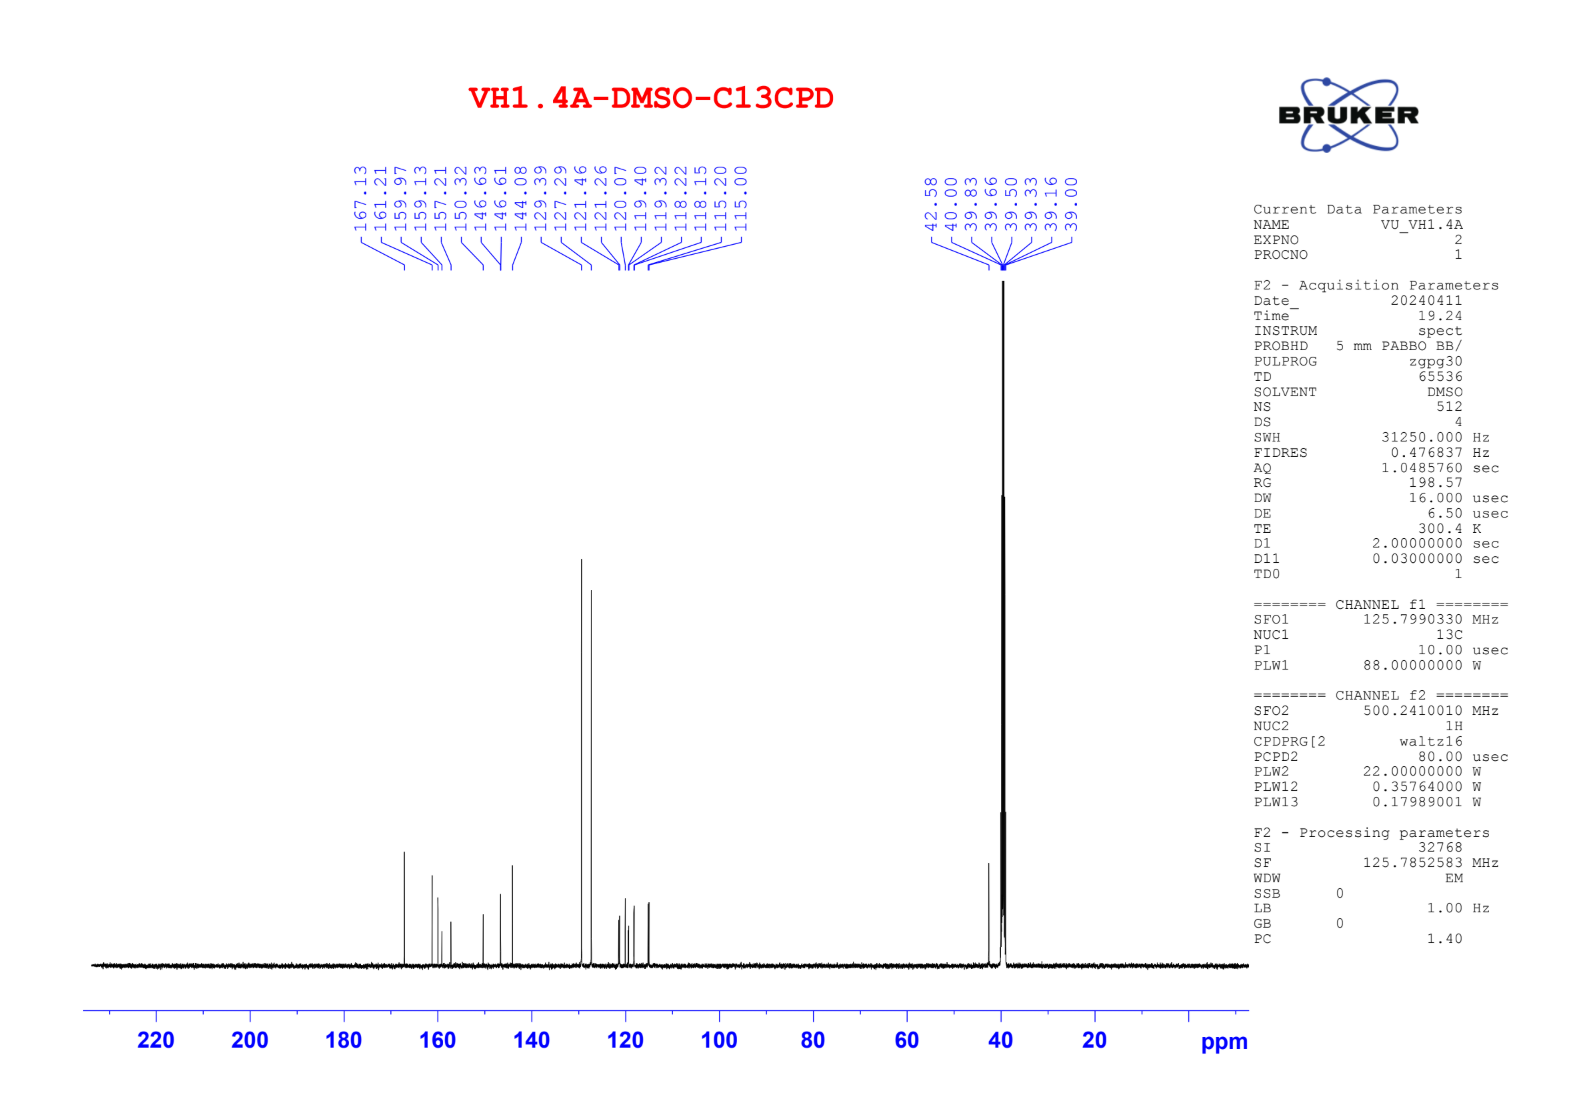
**

**Figure S38. 1H NMR of compound 5c**

**
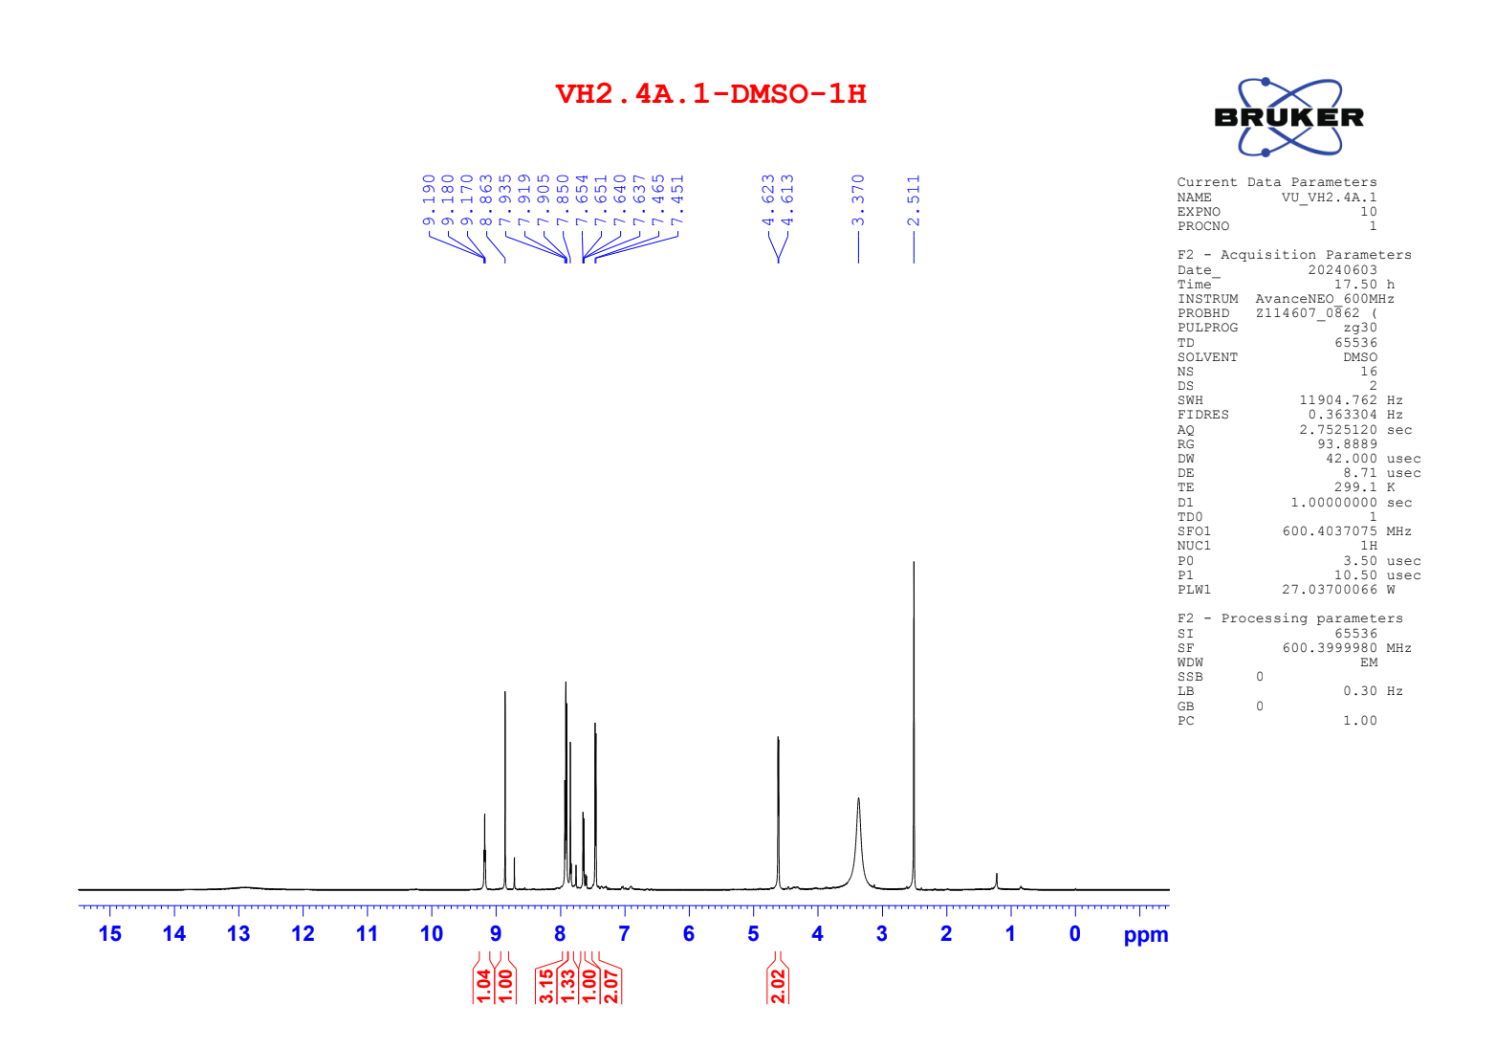
**

**Figure S39. 13C NMR of compound 5c**


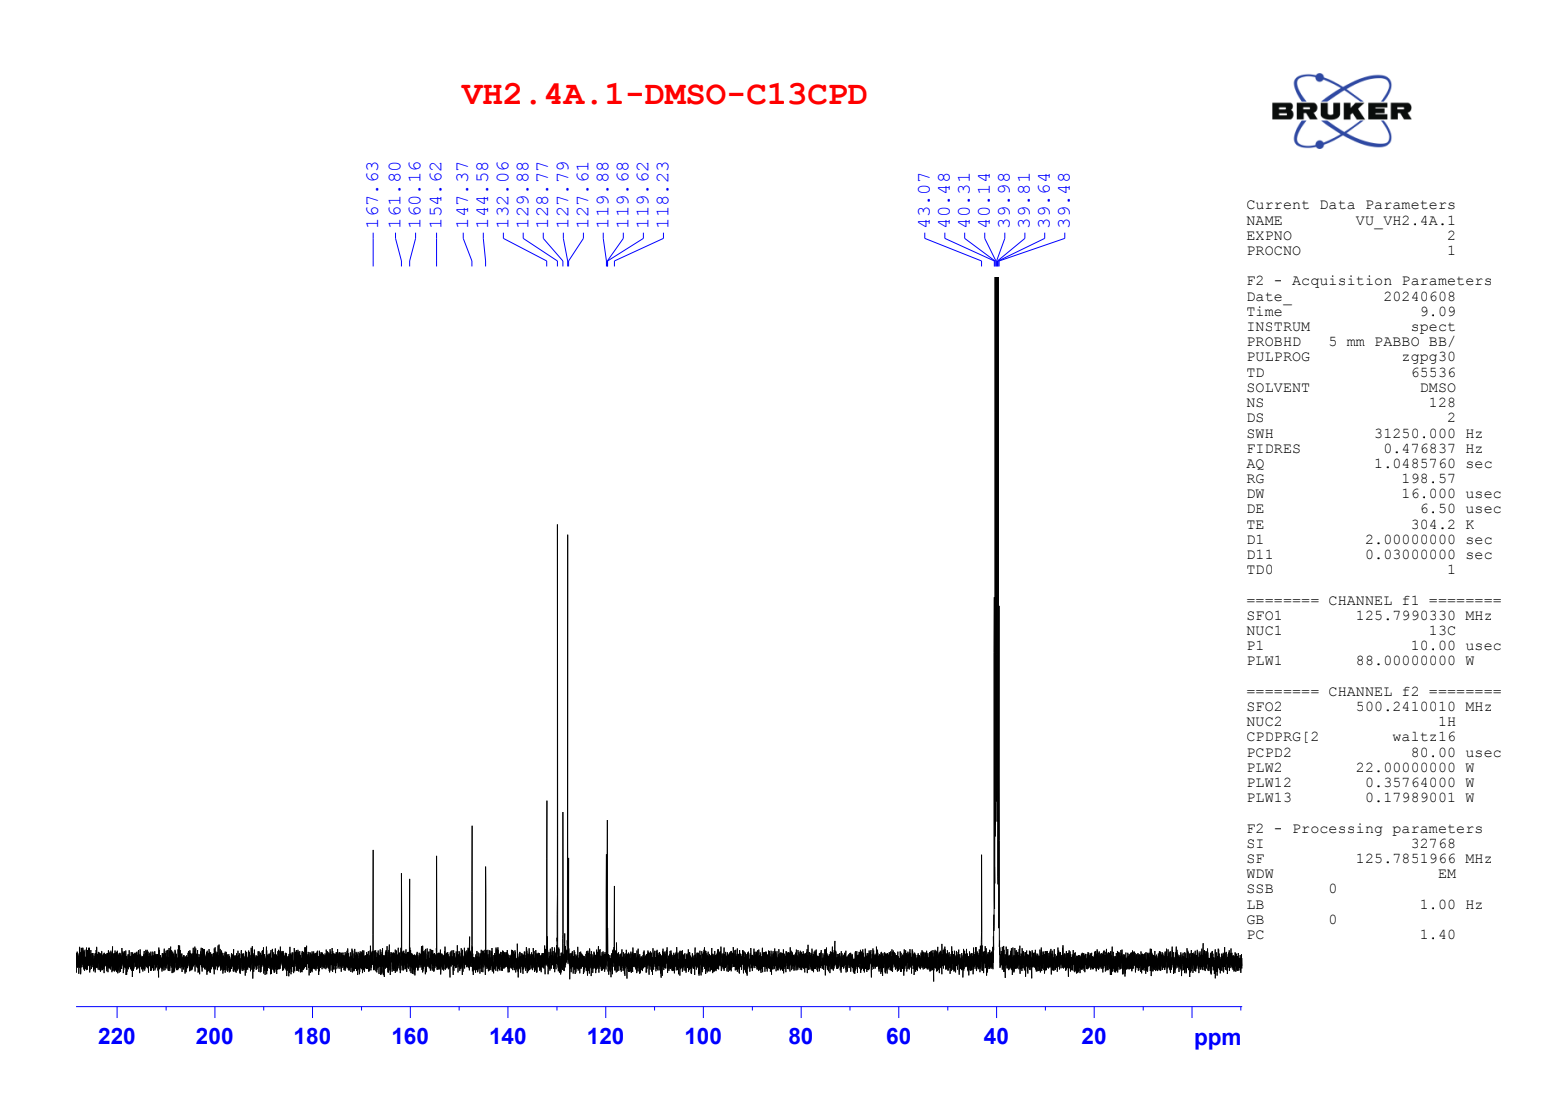


**Figure S40. 1H NMR of compound 5d**

**
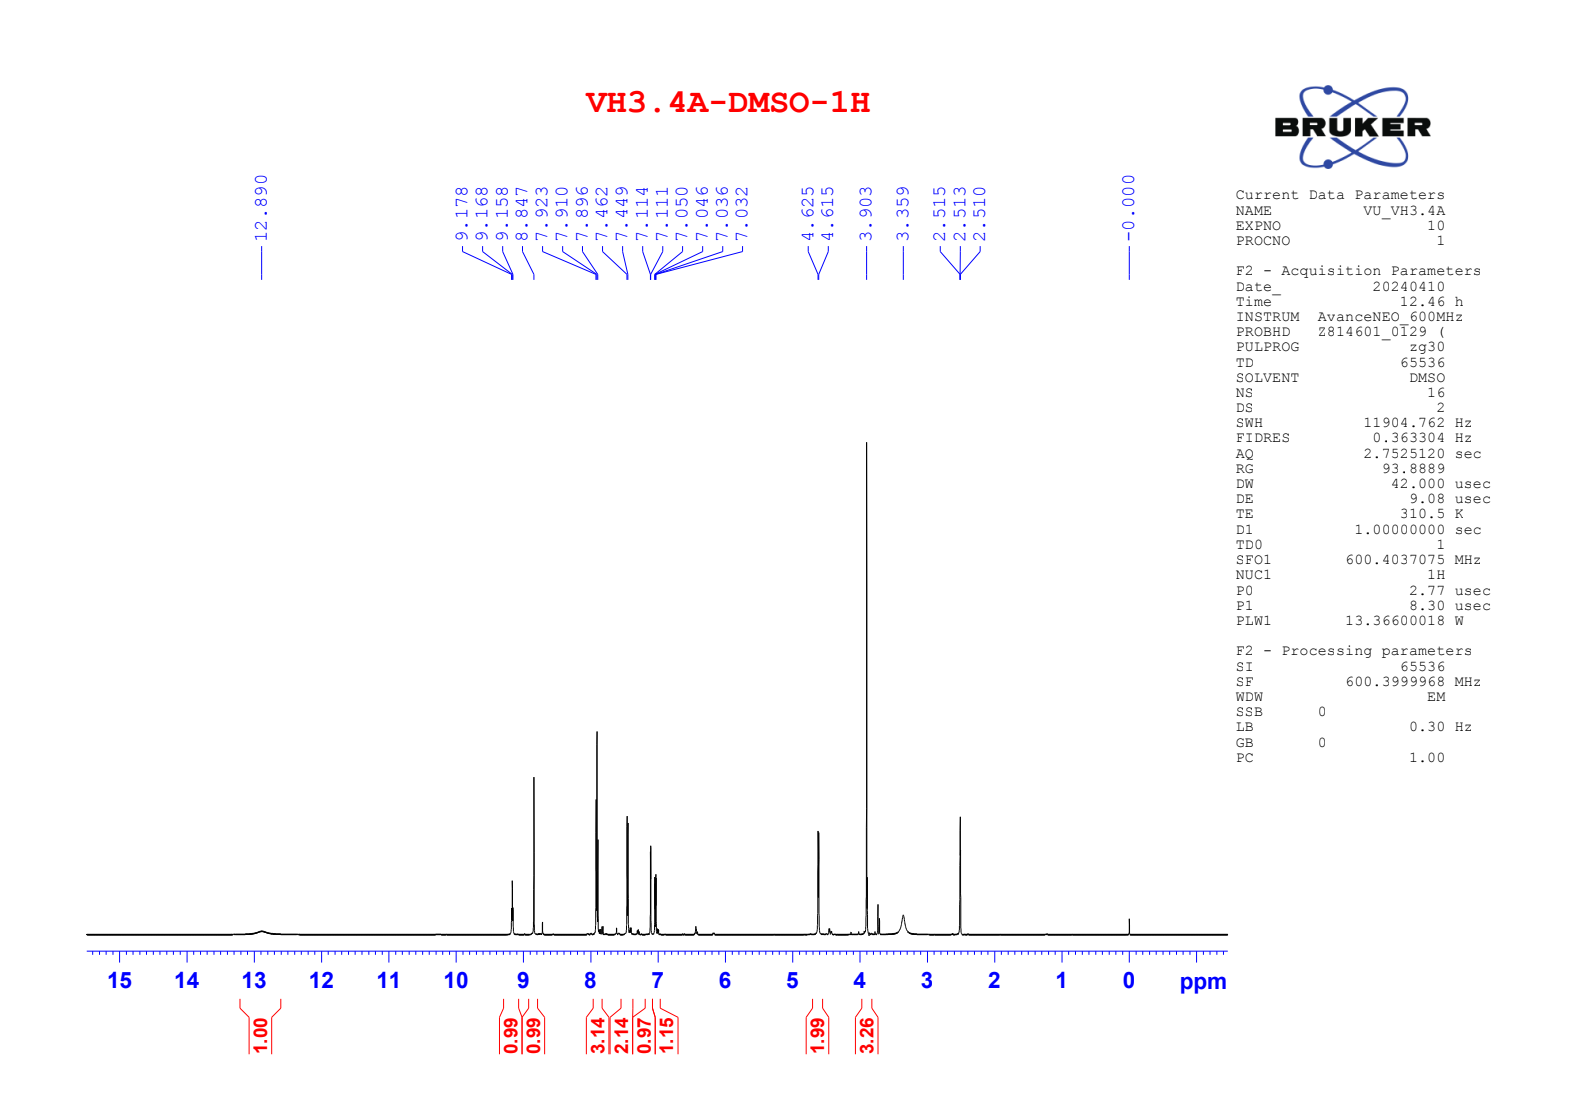
**

**Figure S41. 13C NMR of compound 5d**


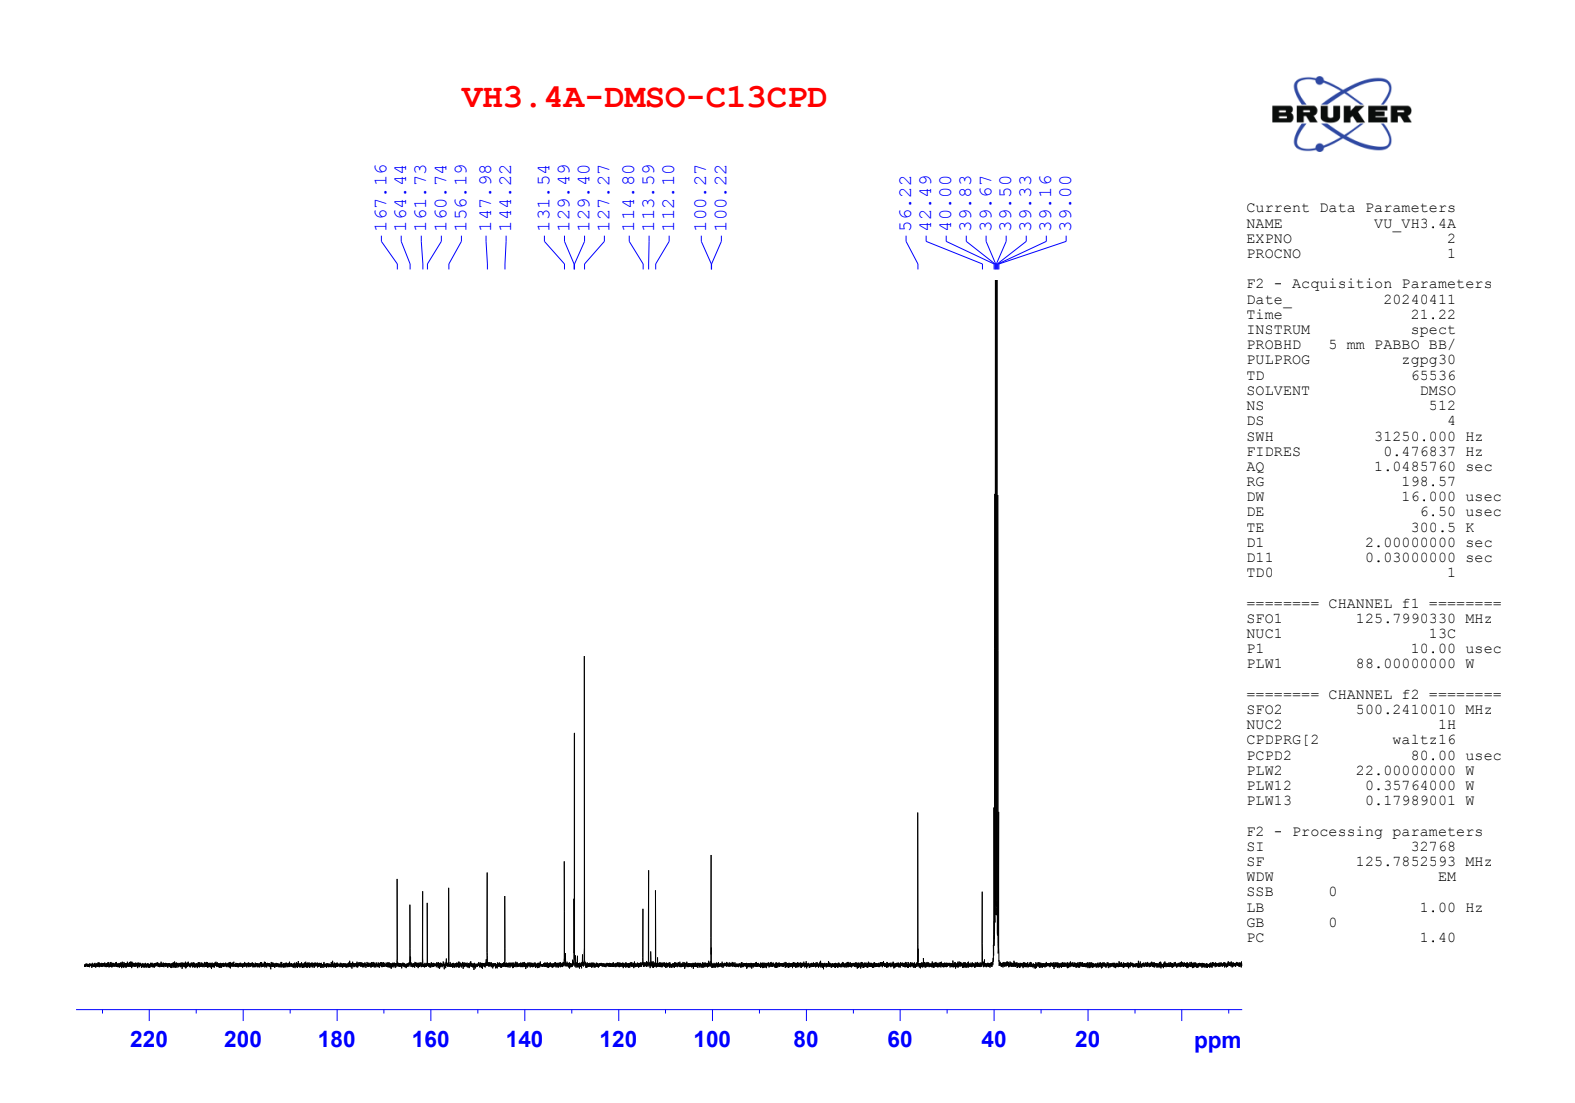


**Figure S42. 1H NMR of compound 5e**

**
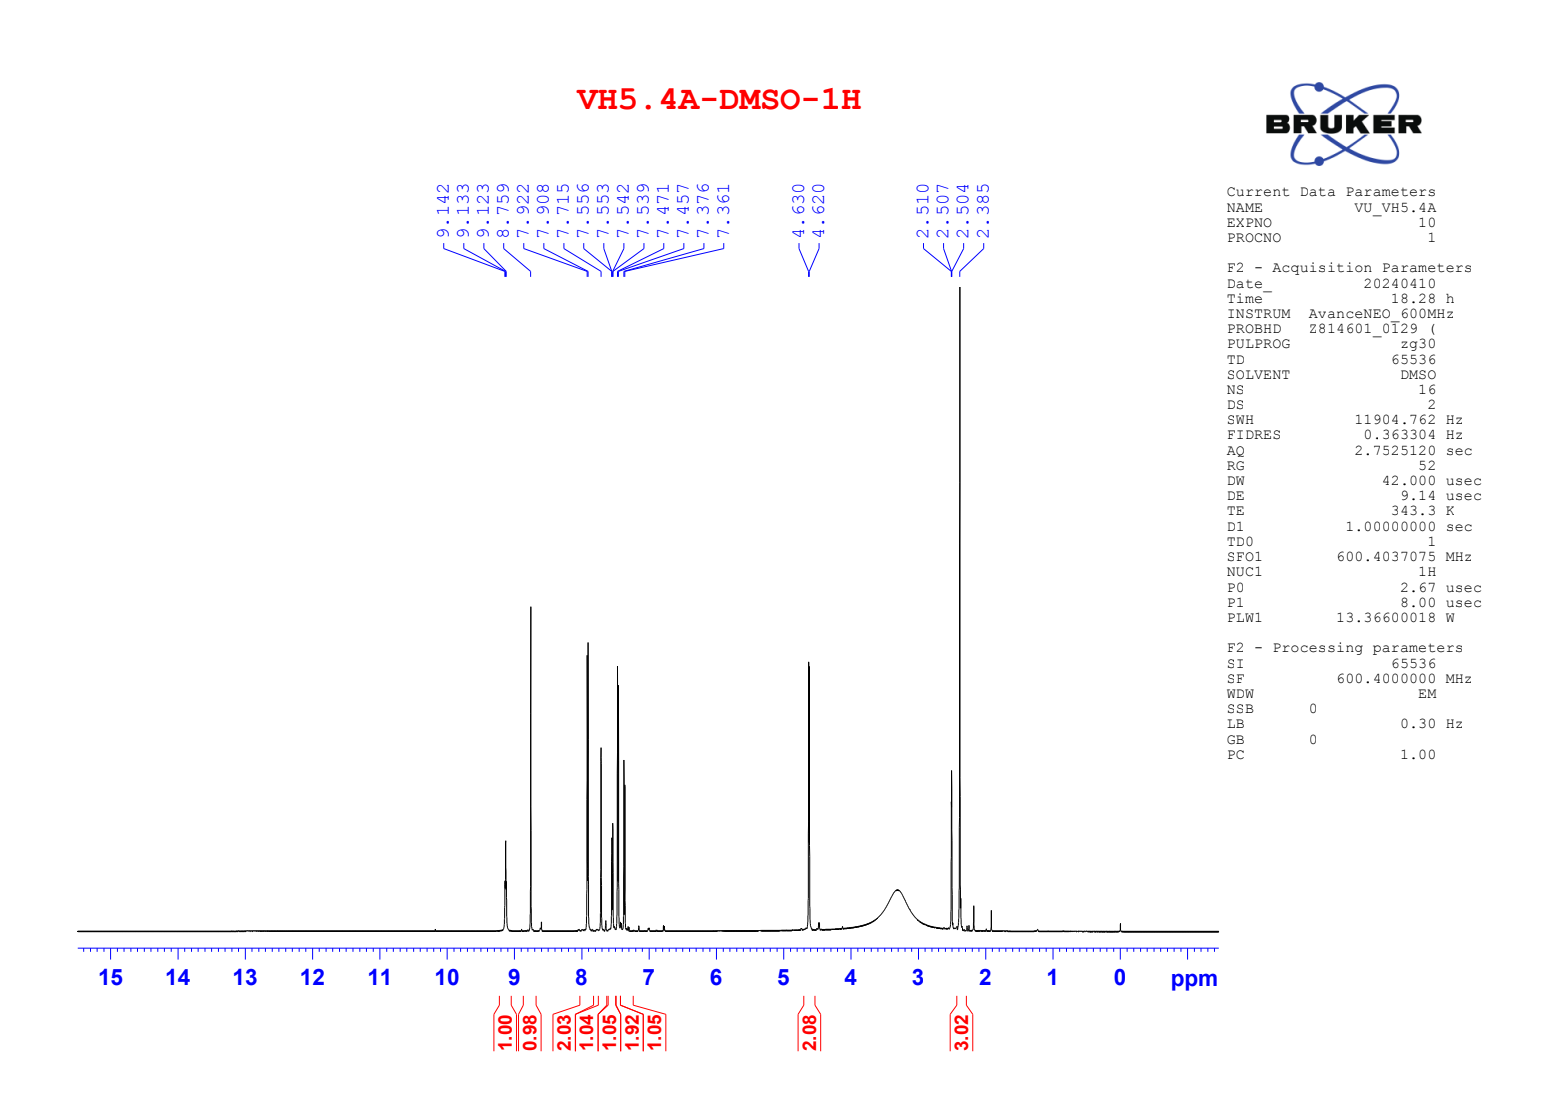
**

**Figure S43. 13C NMR of compound 5e**


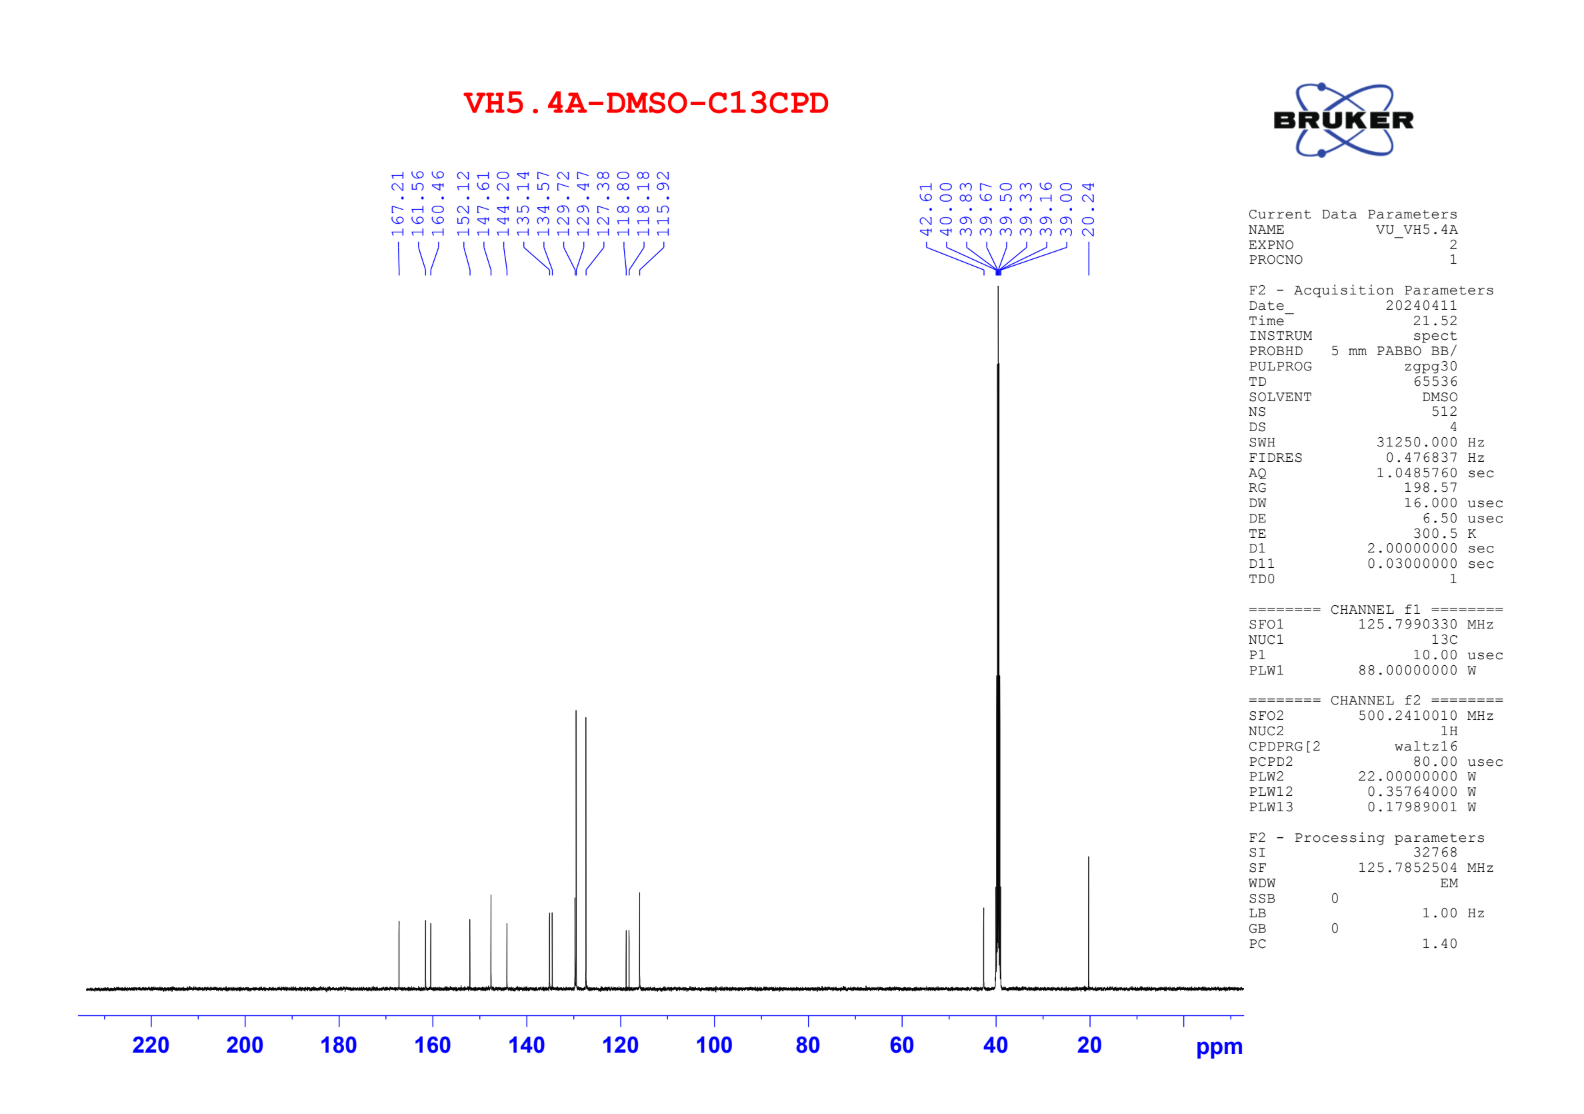


**Figure S44. 1H NMR of compound 5f**

**
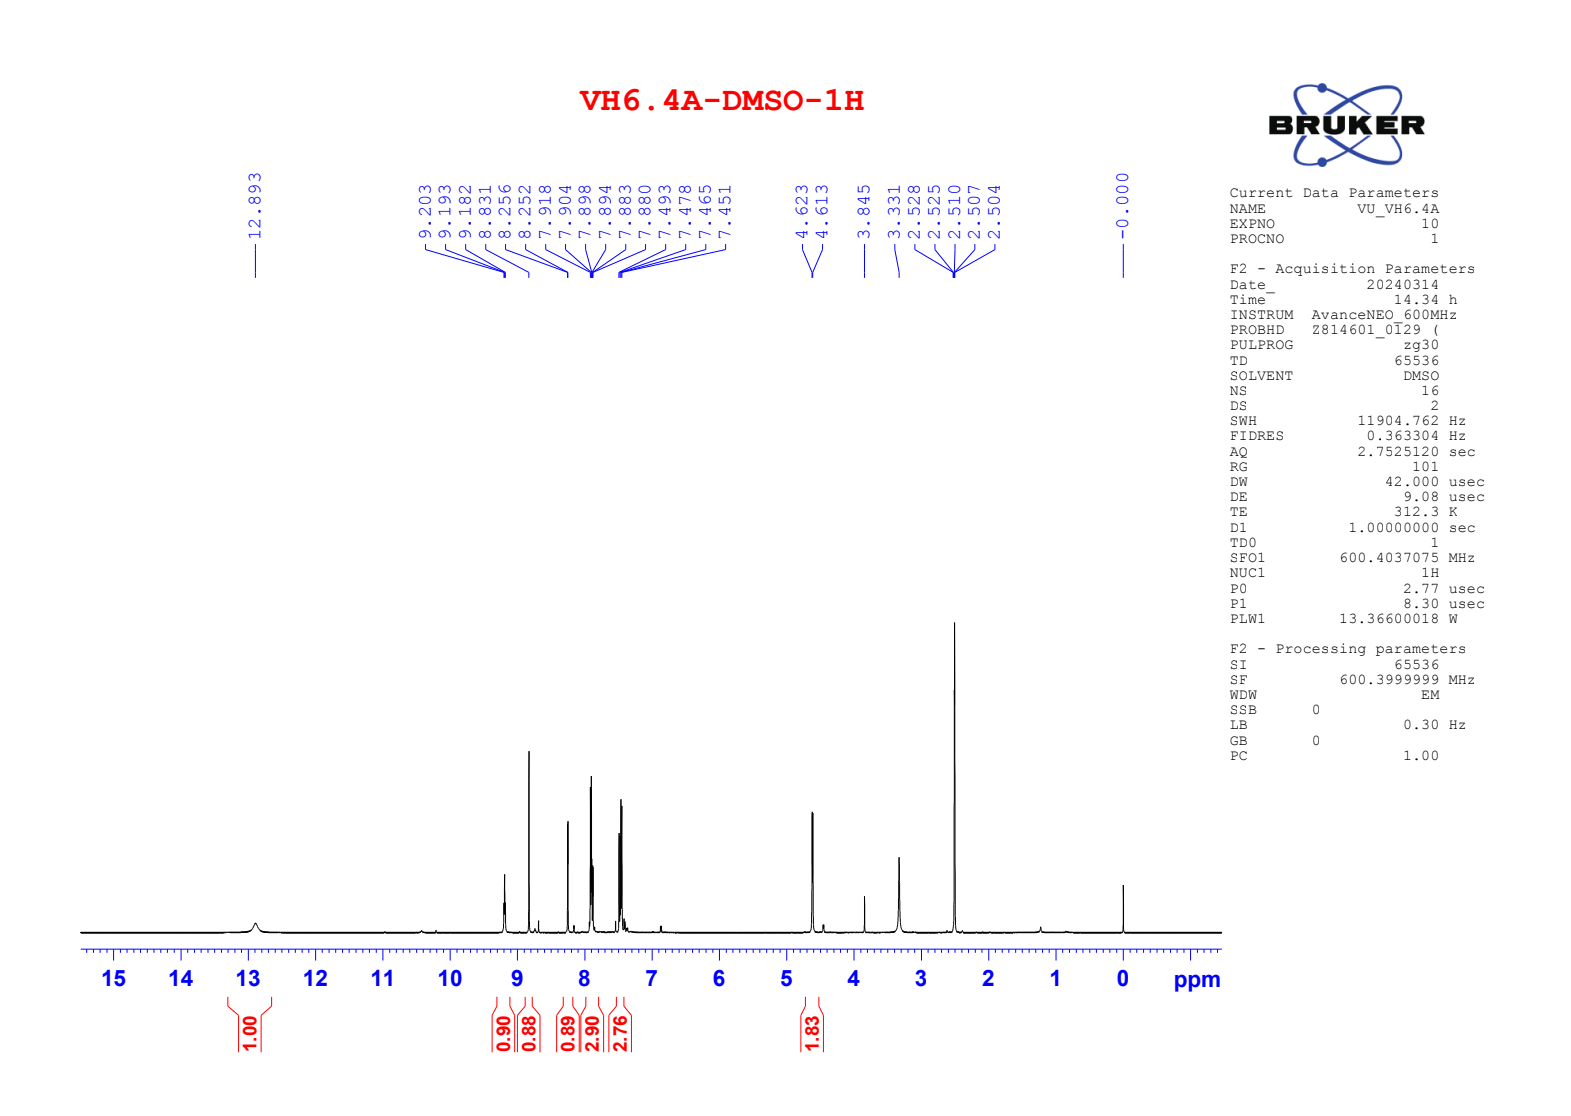
**

**Figure S45. 13C NMR of compound 5f**


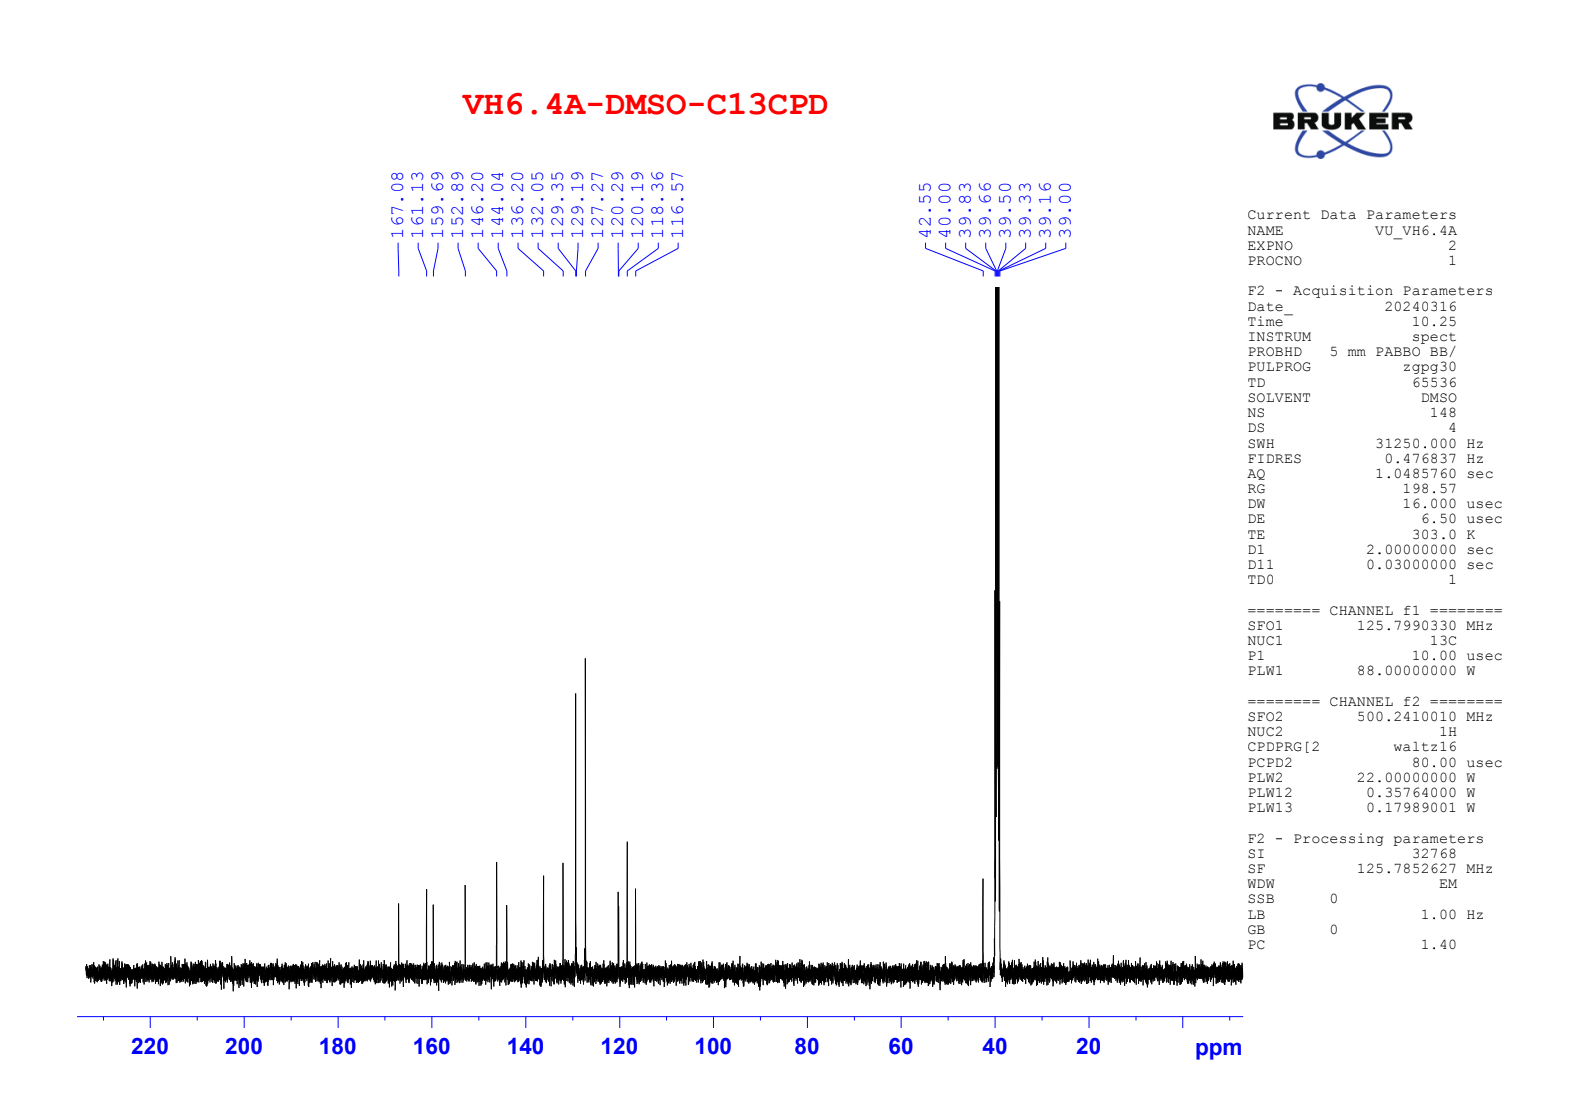


**Figure S46. 1H NMR of compound 5g**


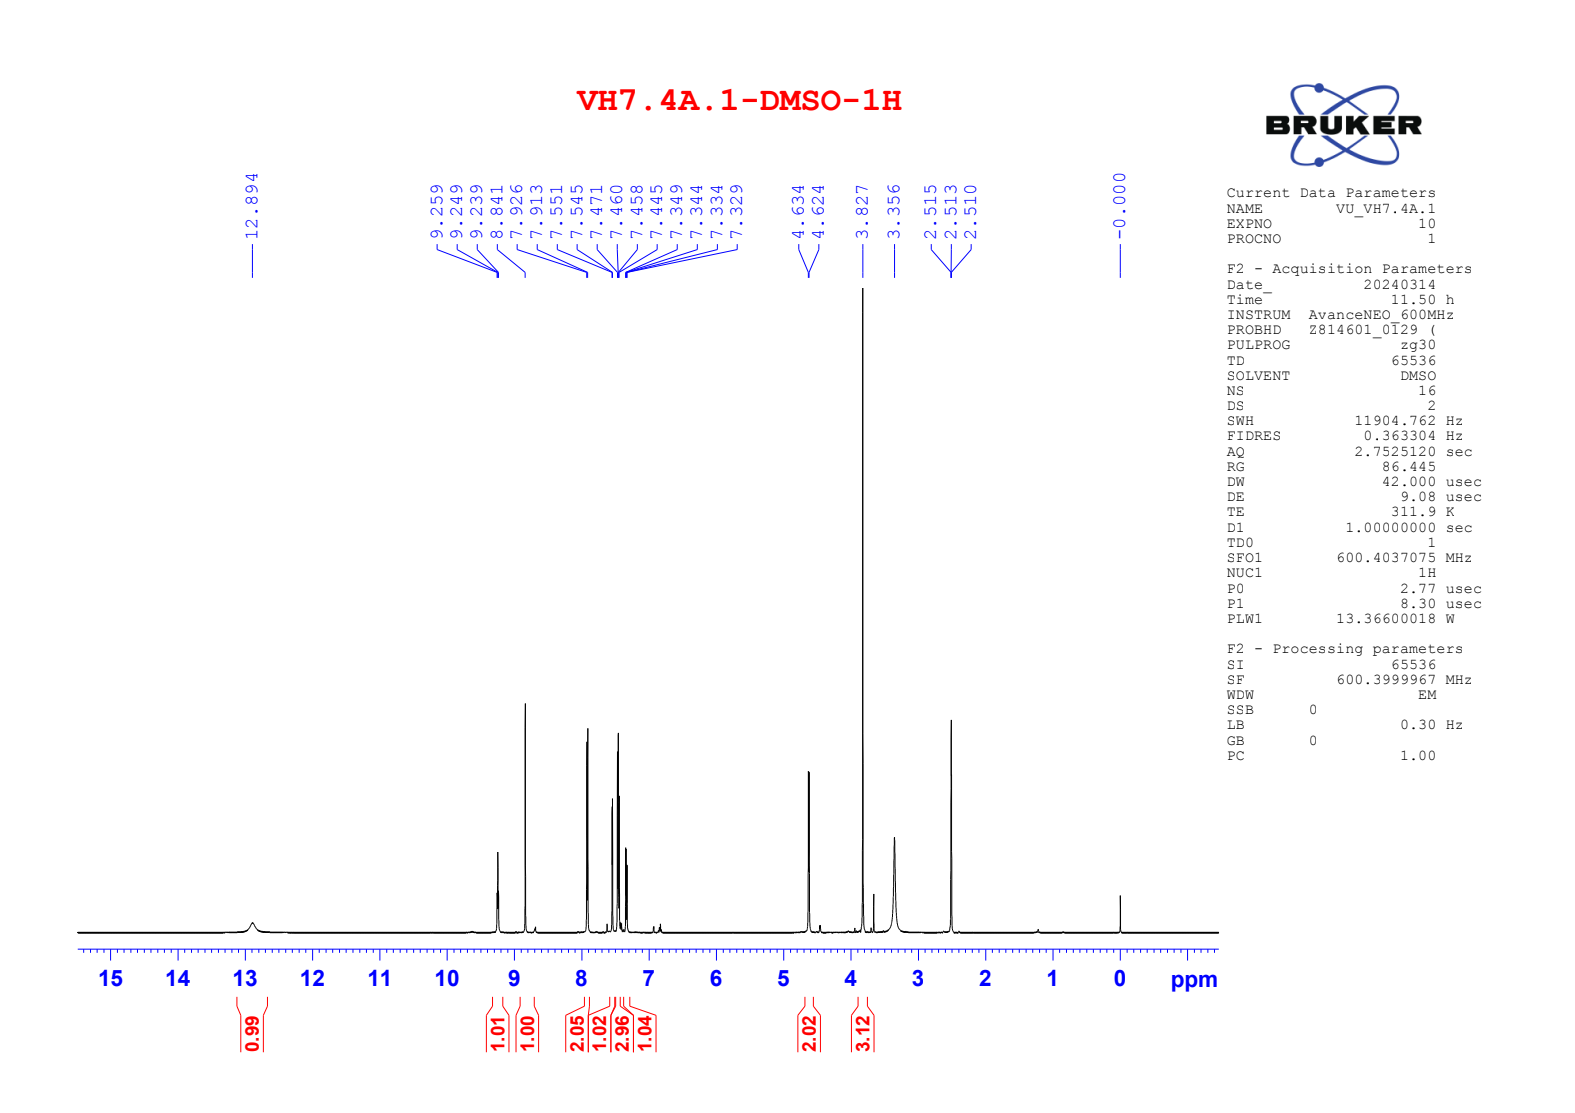


**Figure S47. 13C NMR of compound 5g**


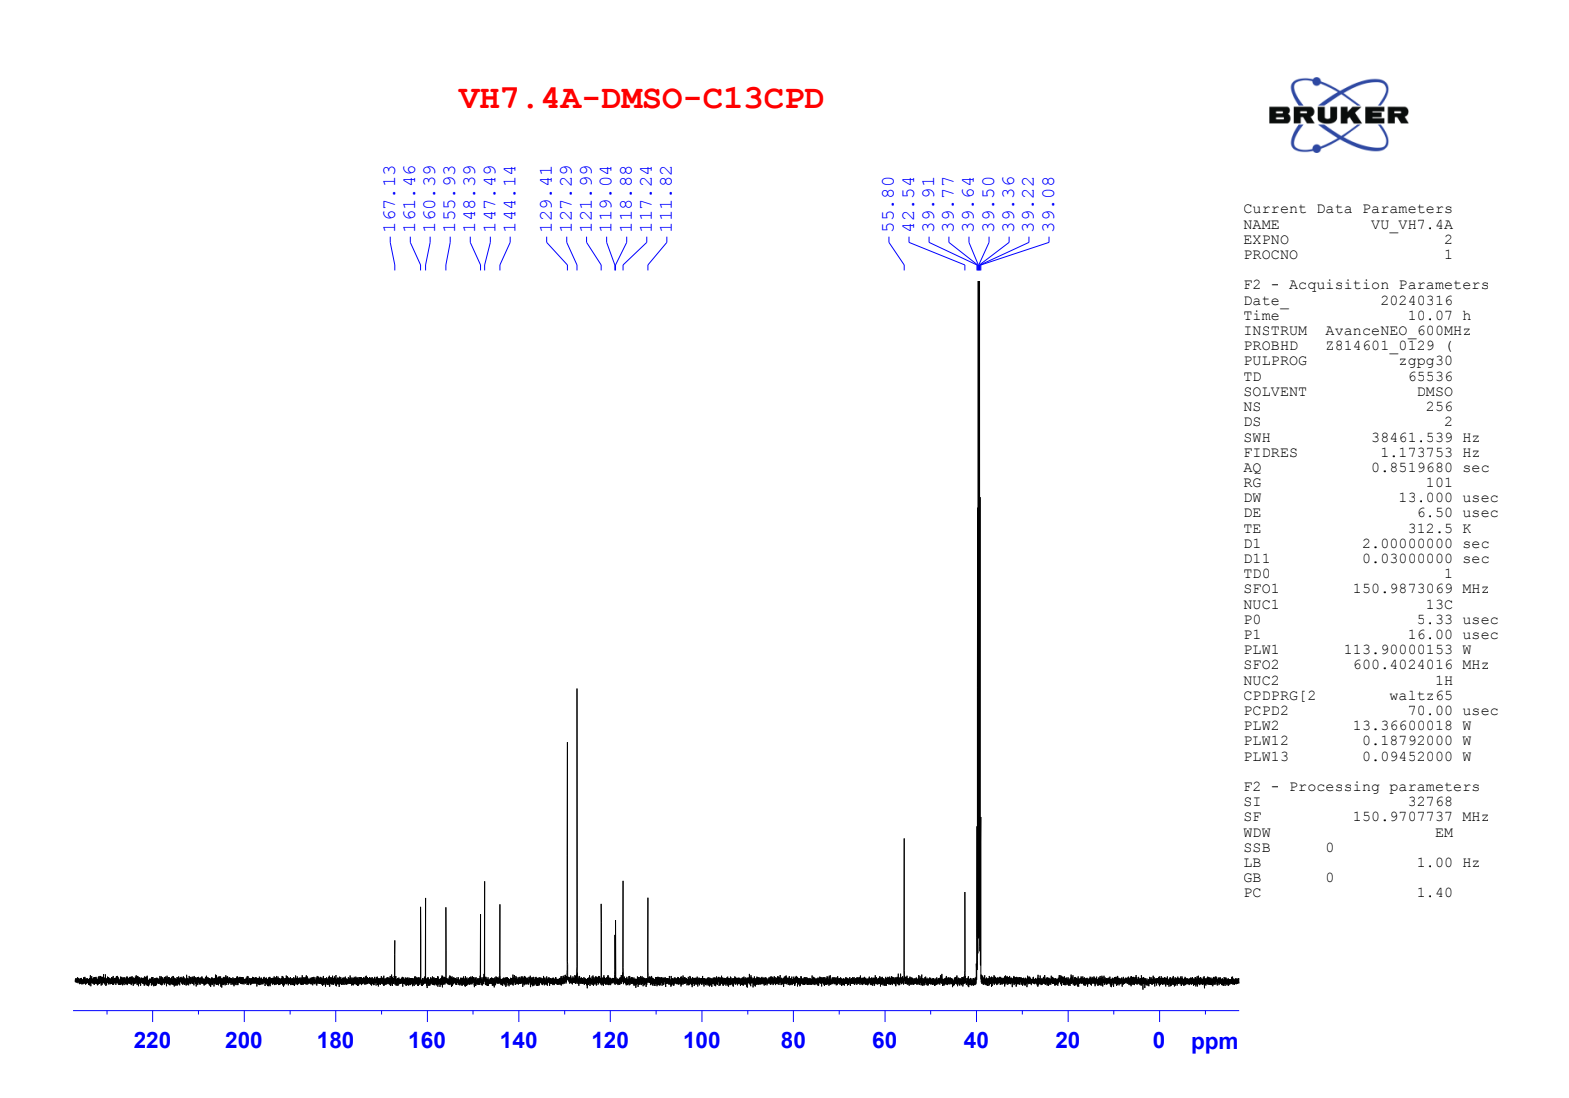


**Figure S48. 1H NMR of compound 6a**

**
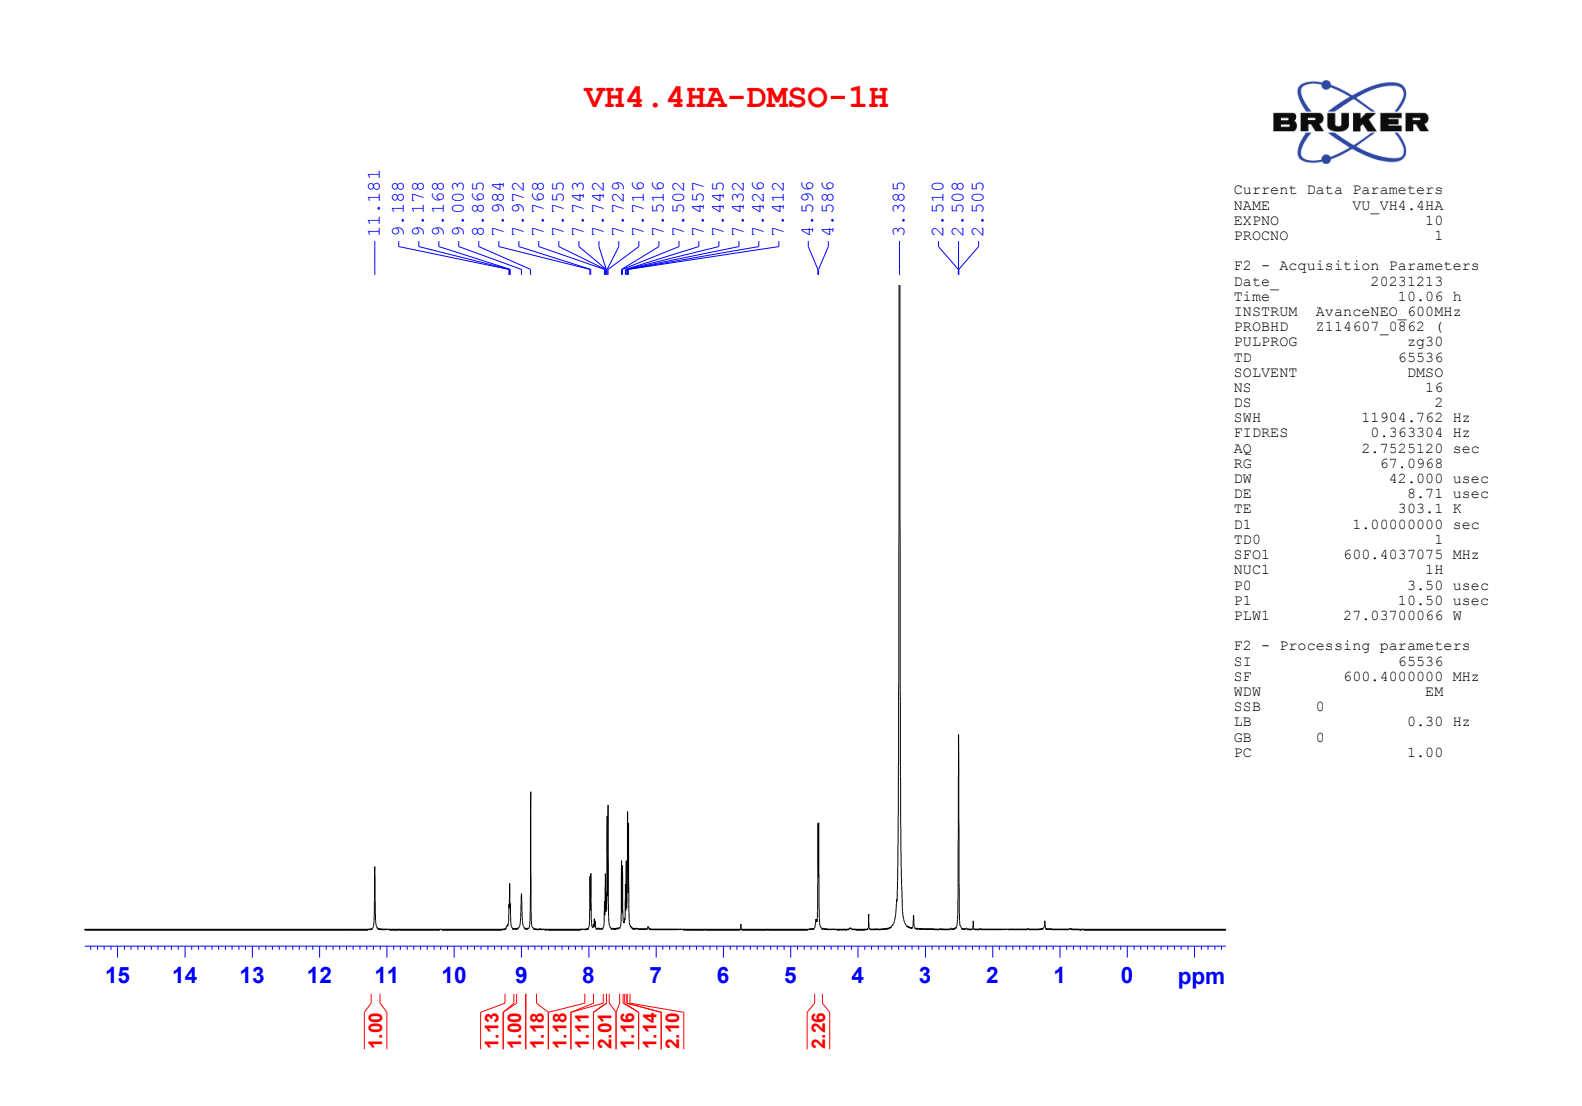
**

**Figure S49. 13C NMR of compound 6a**


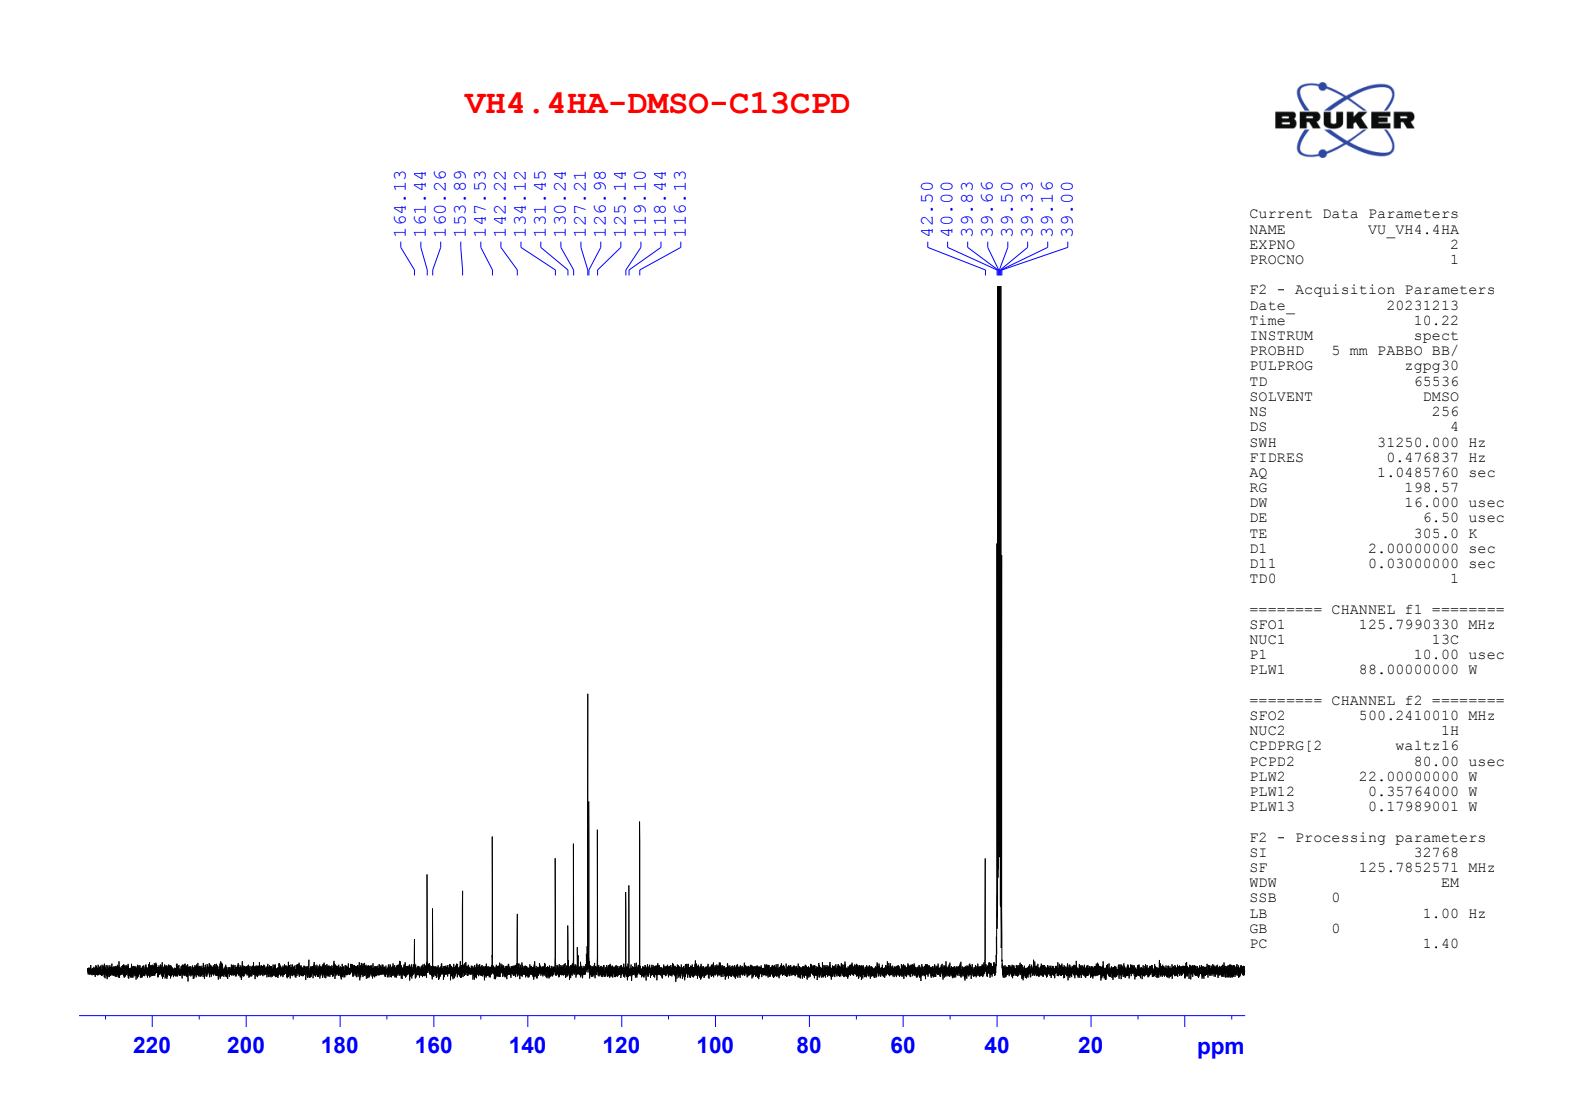


**Figure S50. 1H NMR of compound 6b**

**
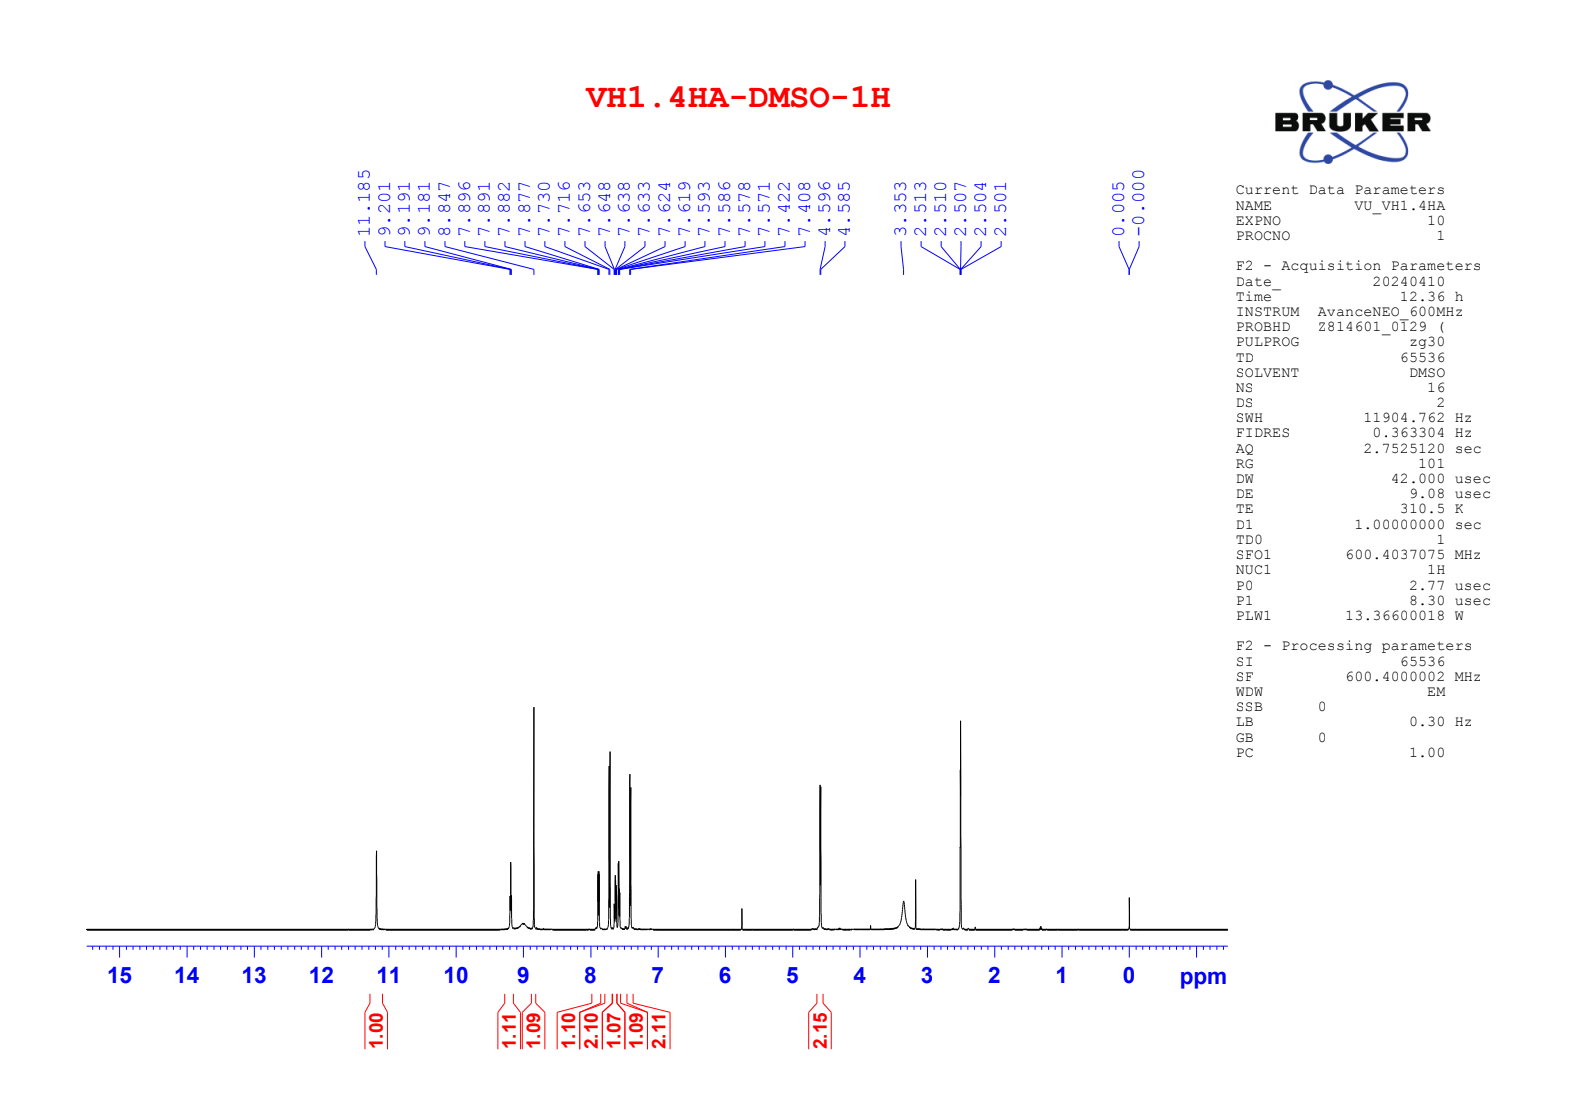
**

**Figure S51. 13C NMR of compound 6b**


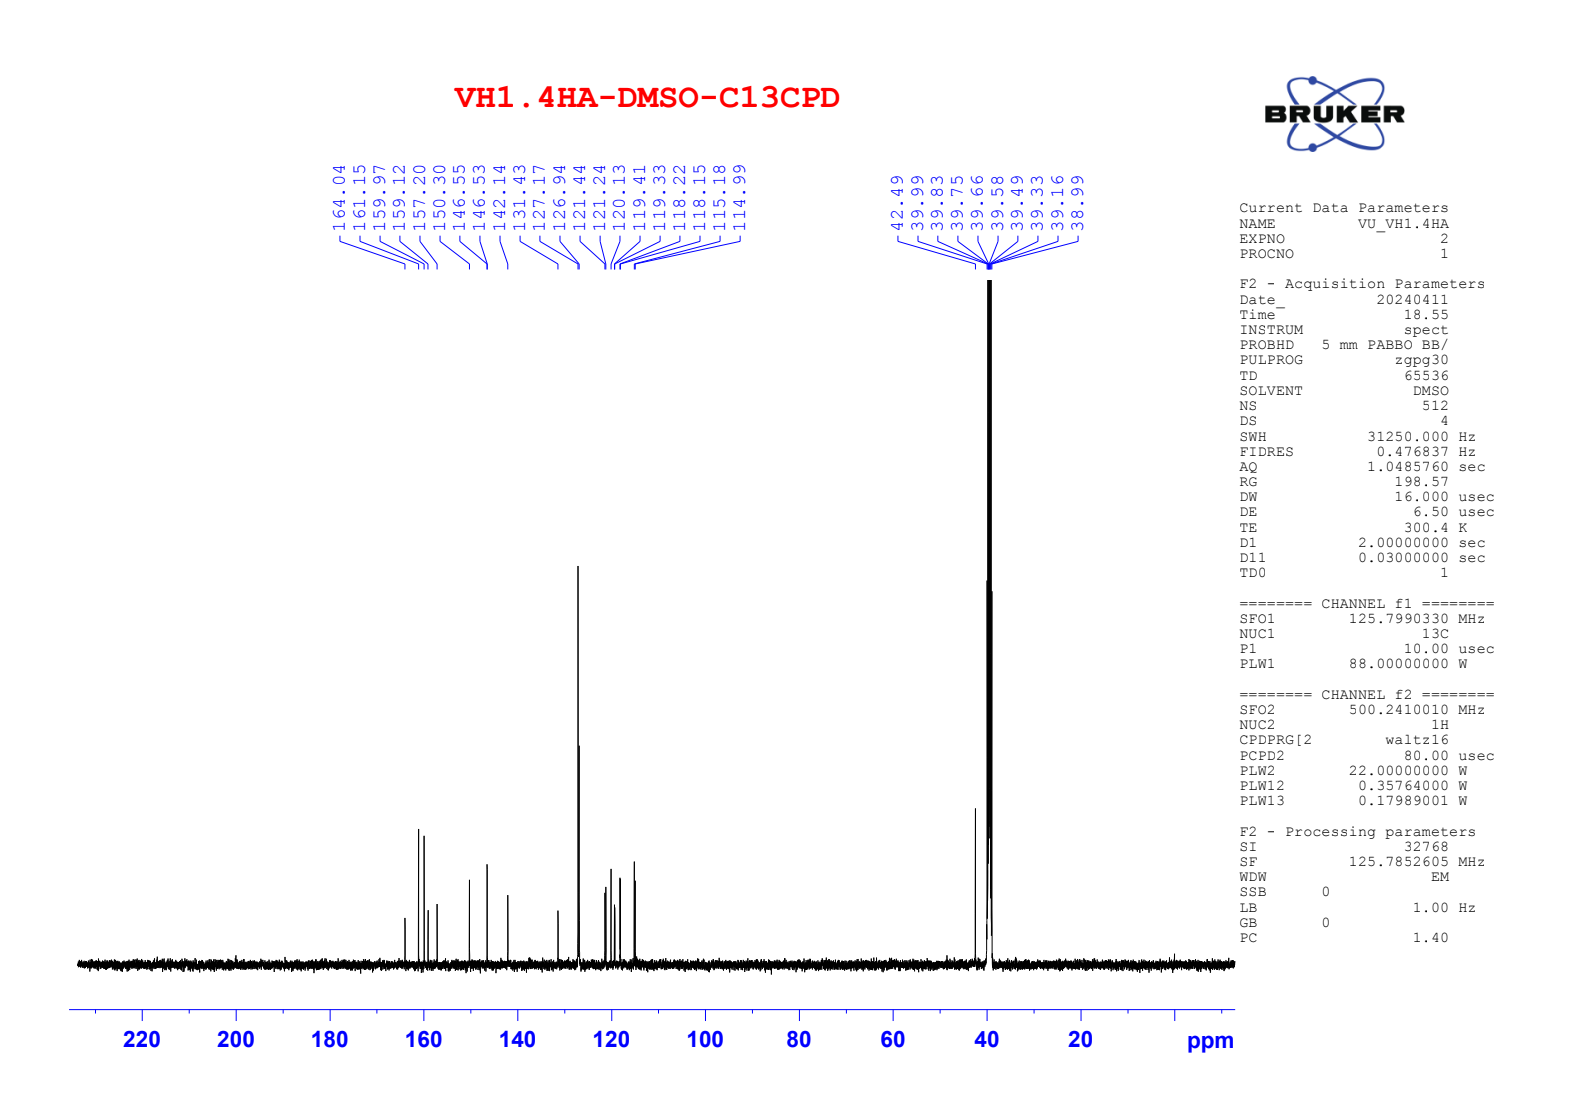


**Figure S52. 1H NMR of compound 6c**


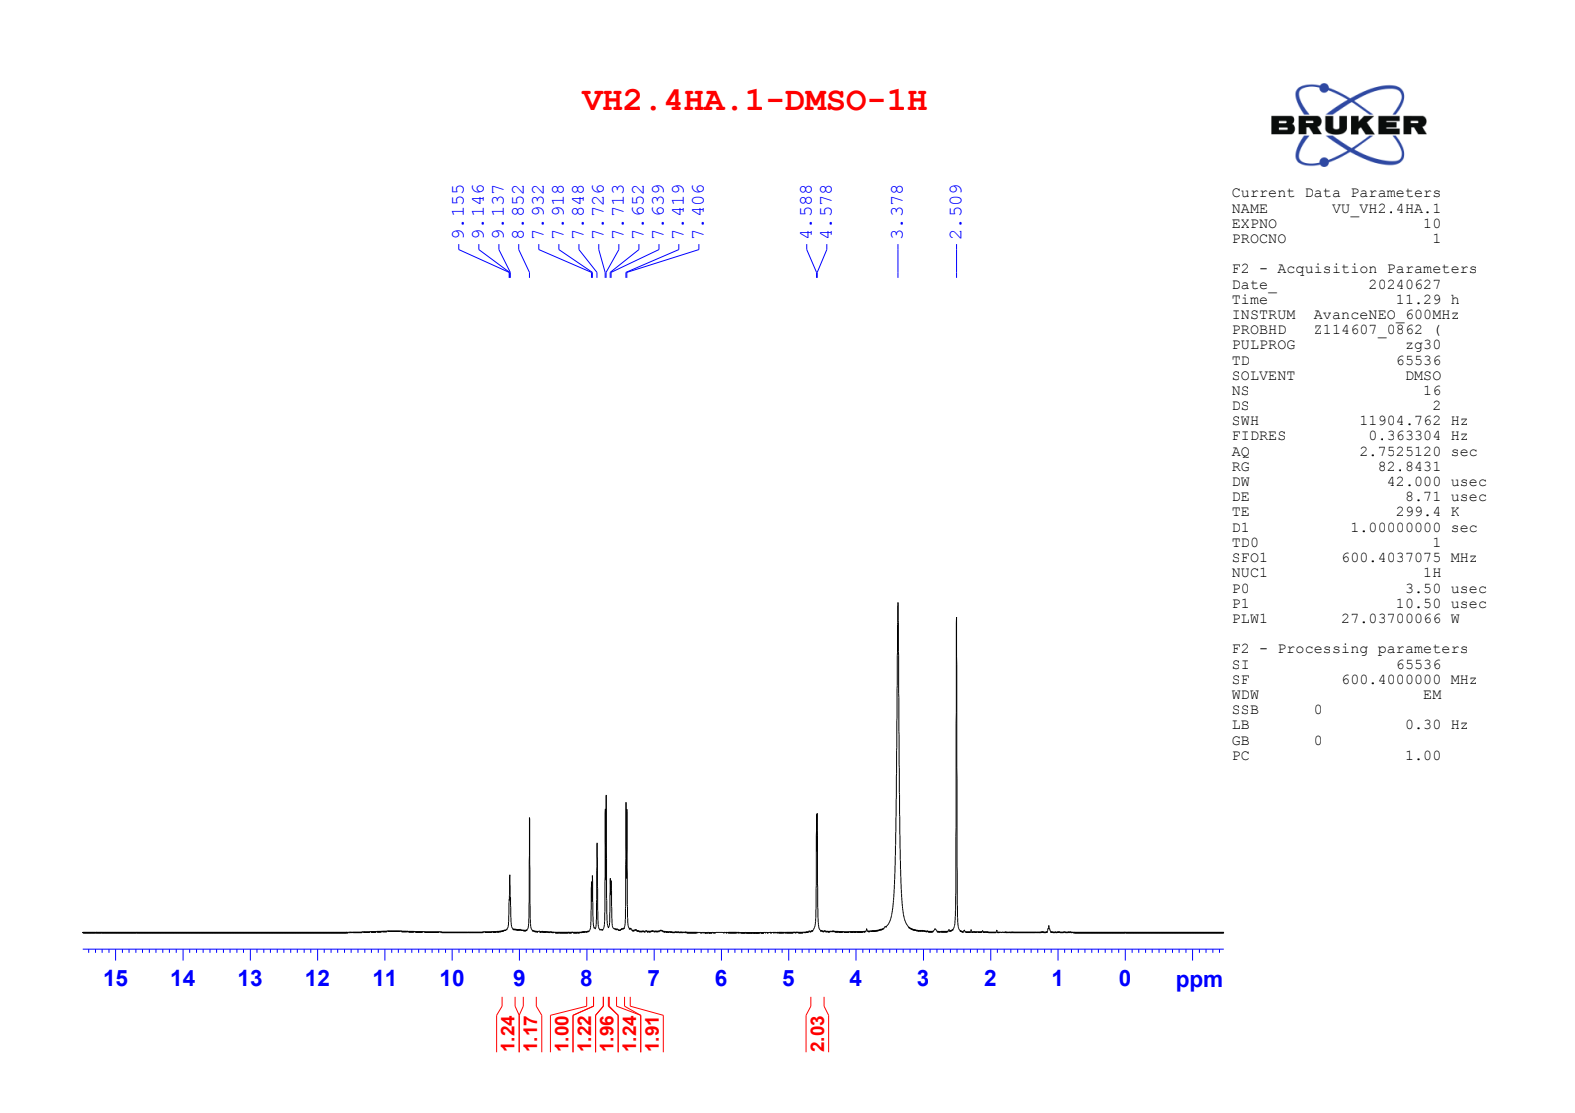


**Figure S53. 13C NMR of compound 6c**


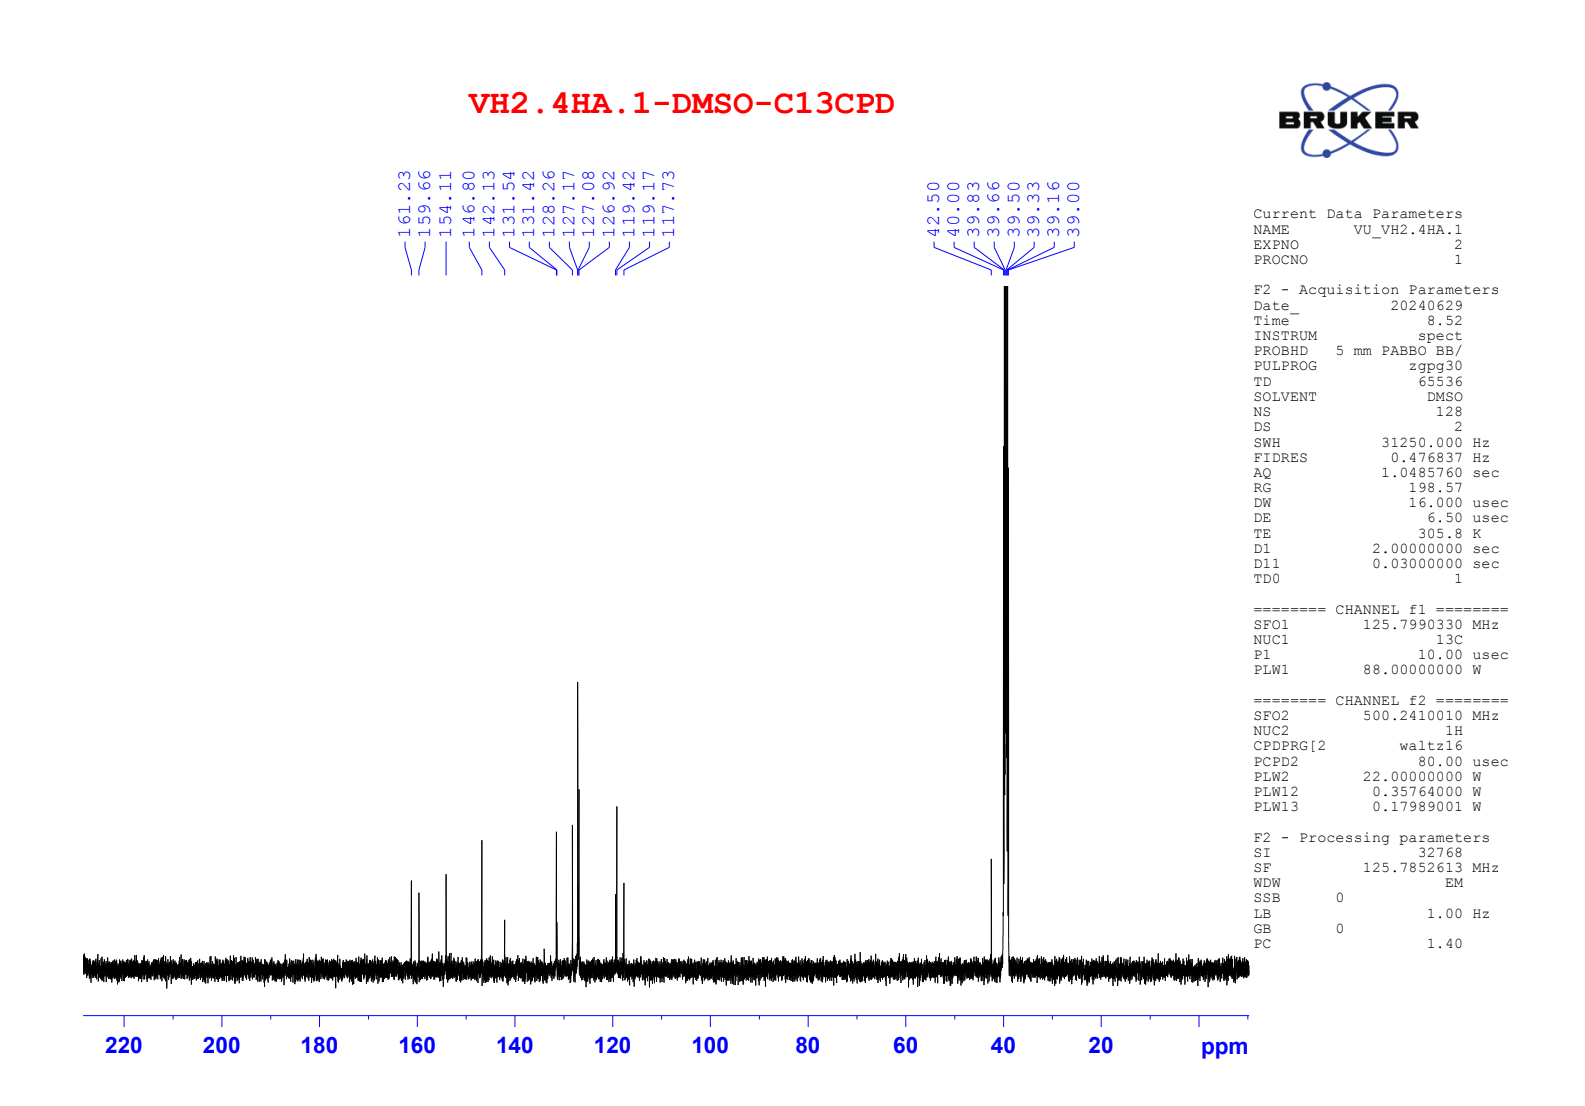


**Figure S54. 1H NMR of compound 6d**

**
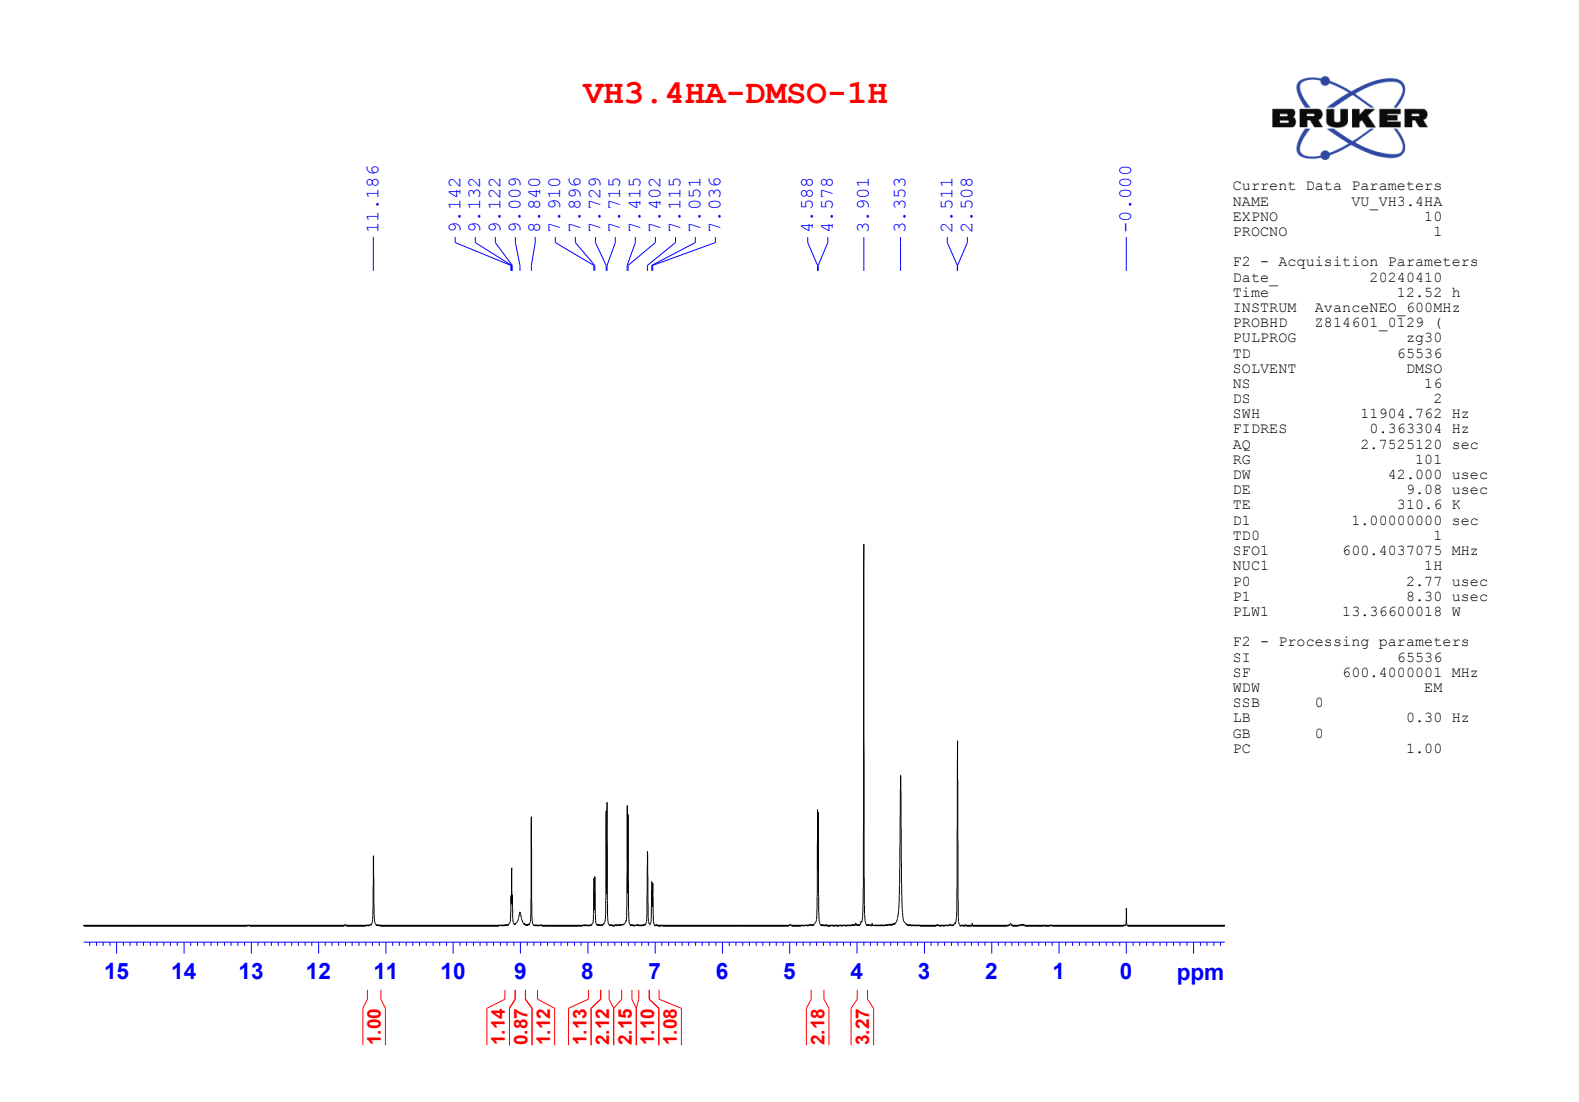
**

**Figure S55. 13C NMR of compound 6d**


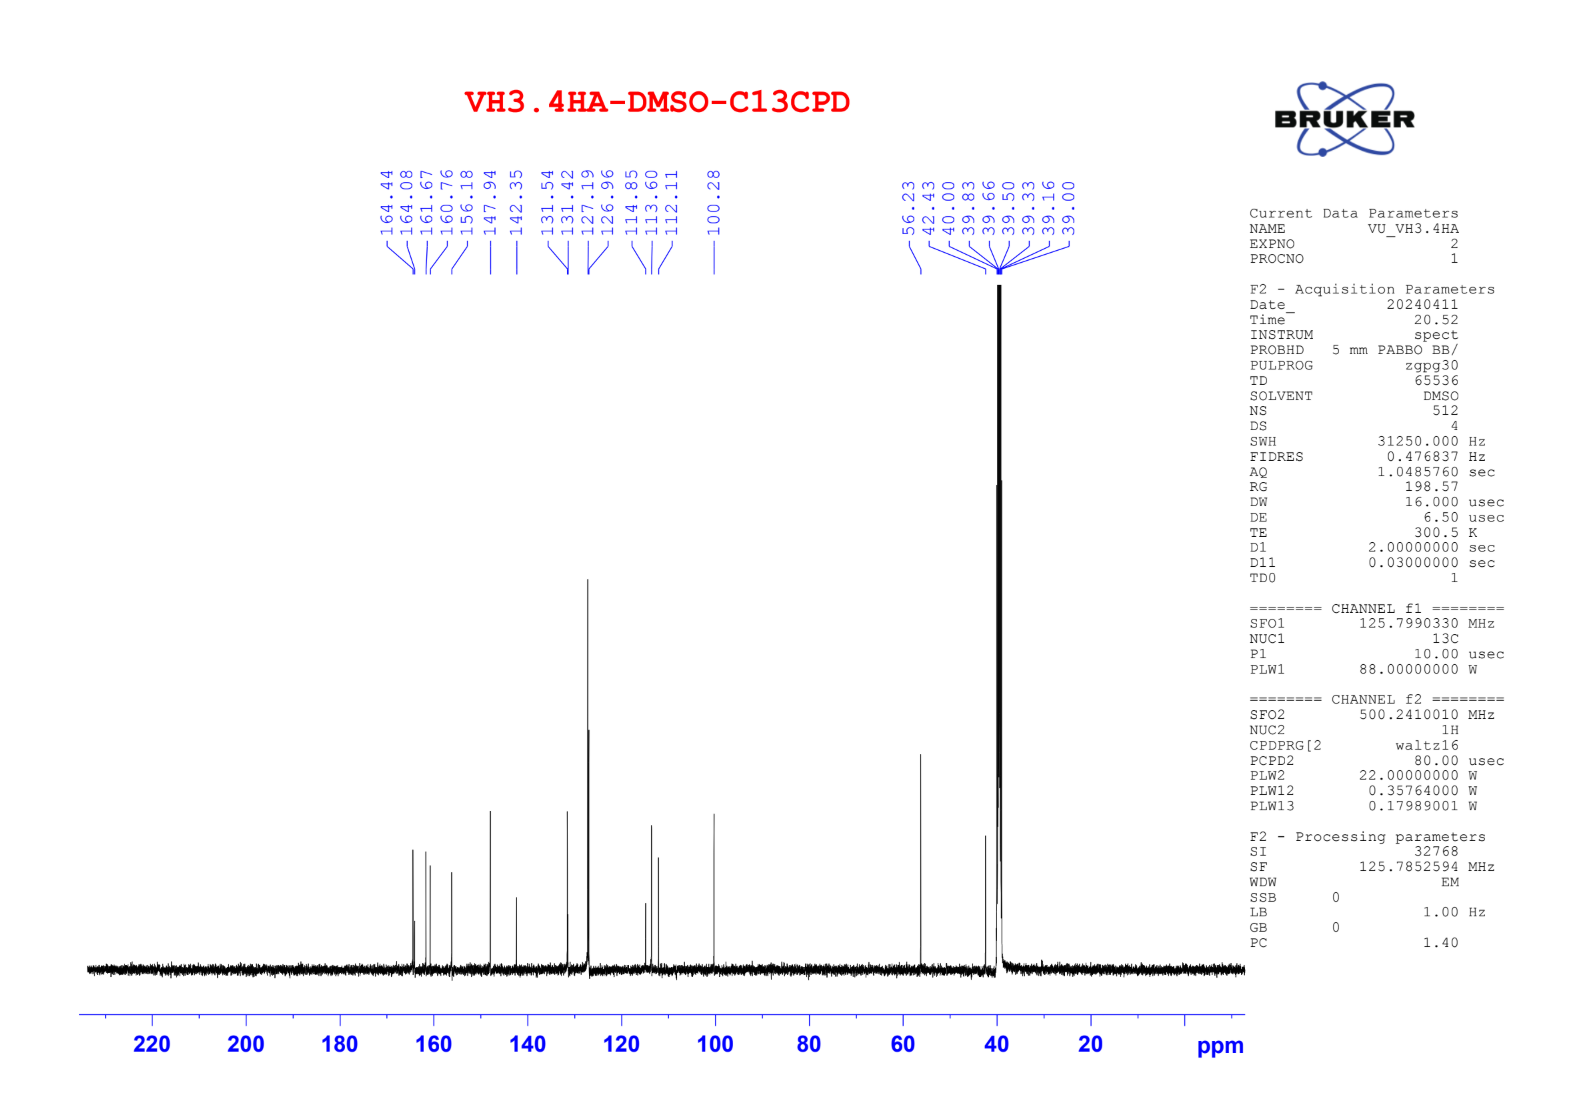


**Figure S56. 1H NMR of compound 6e**

**
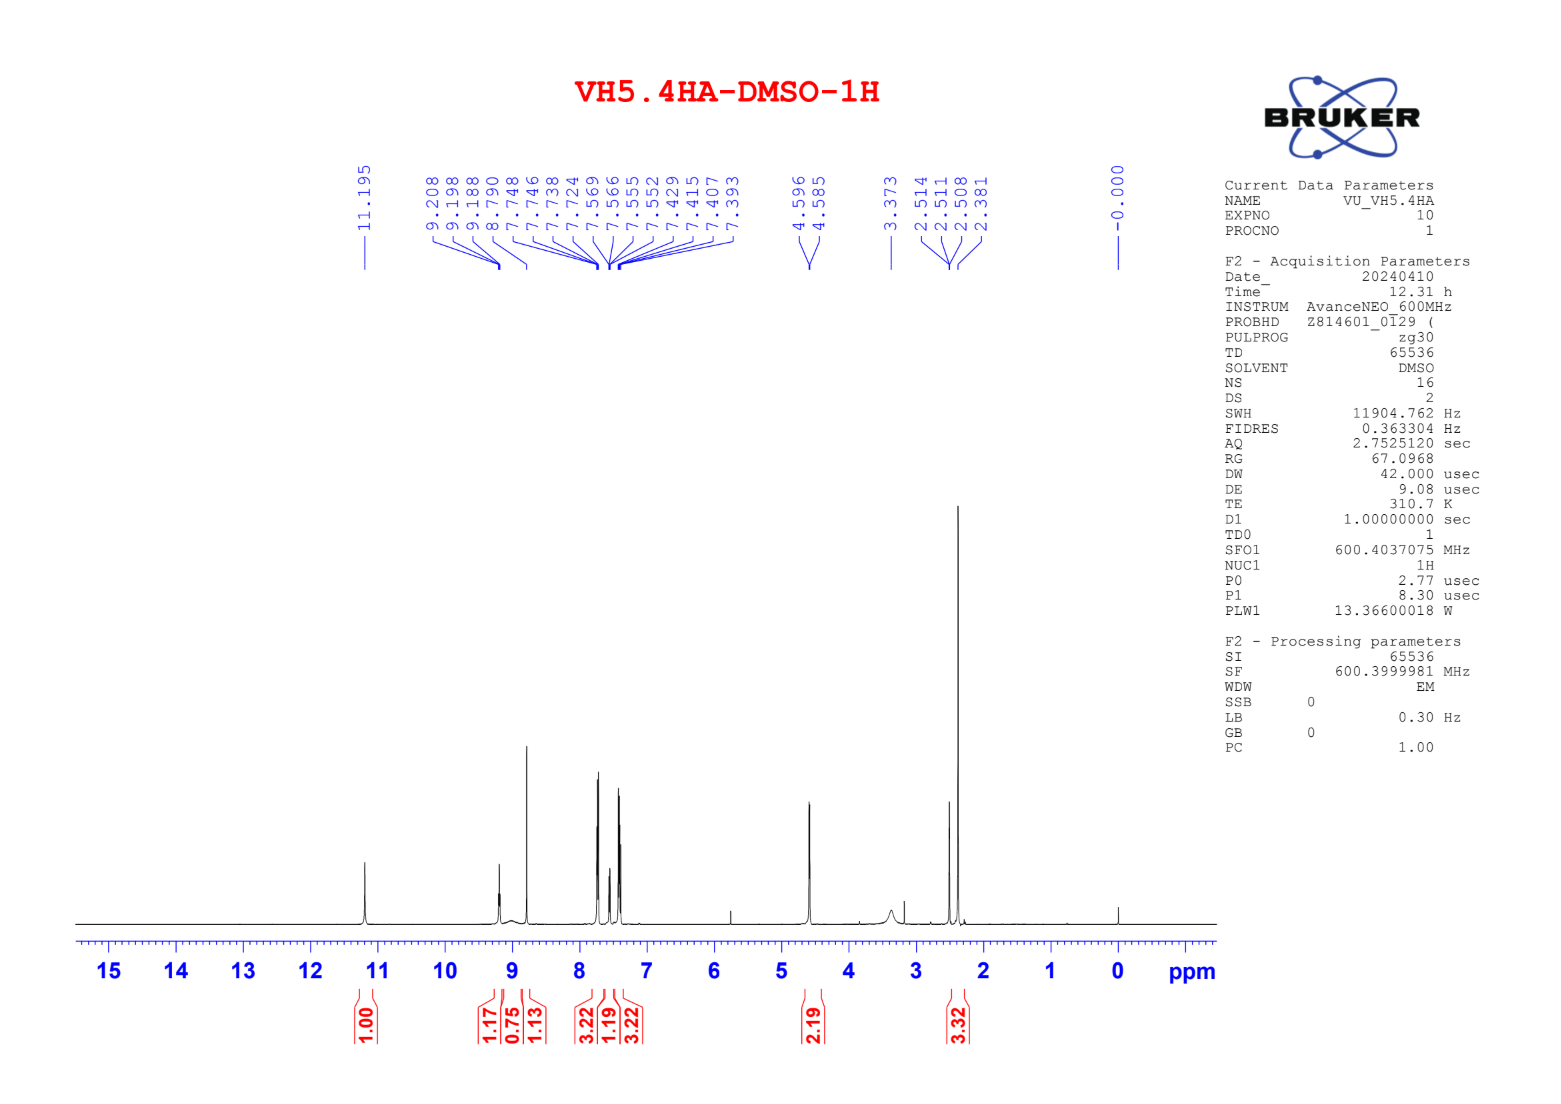
**

**Figure S57. 13C NMR of compound 6e**


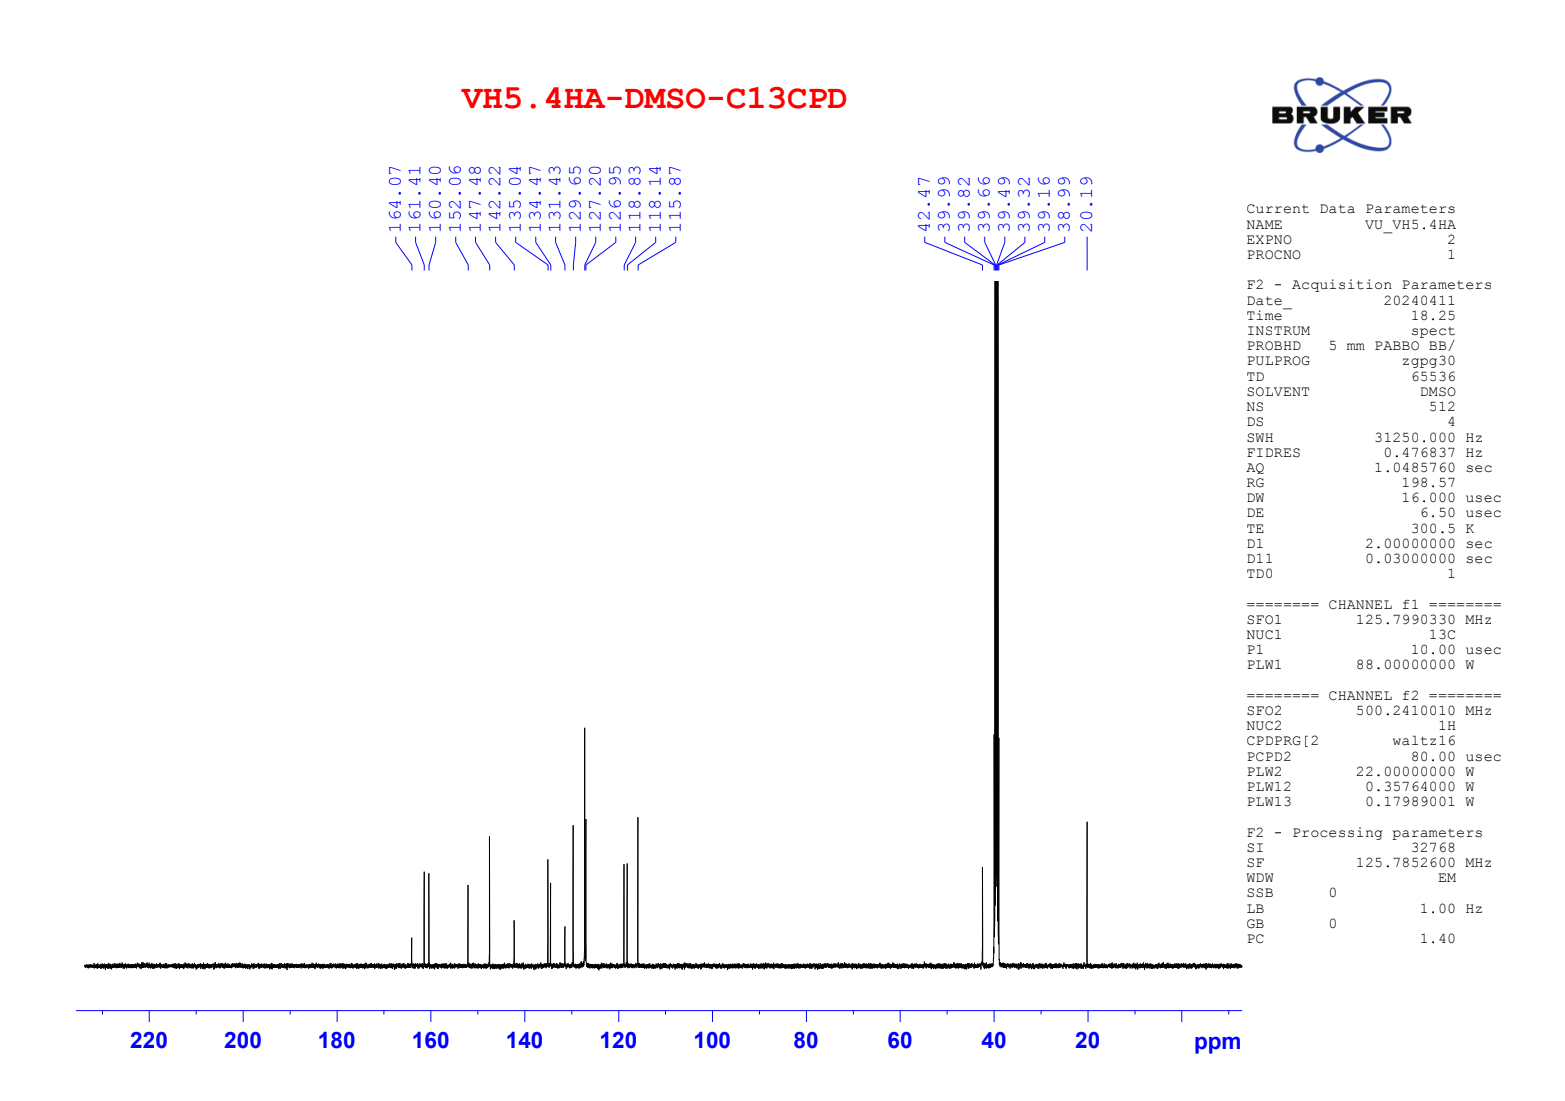


**Figure S58. 1H NMR of compound 6f**

**
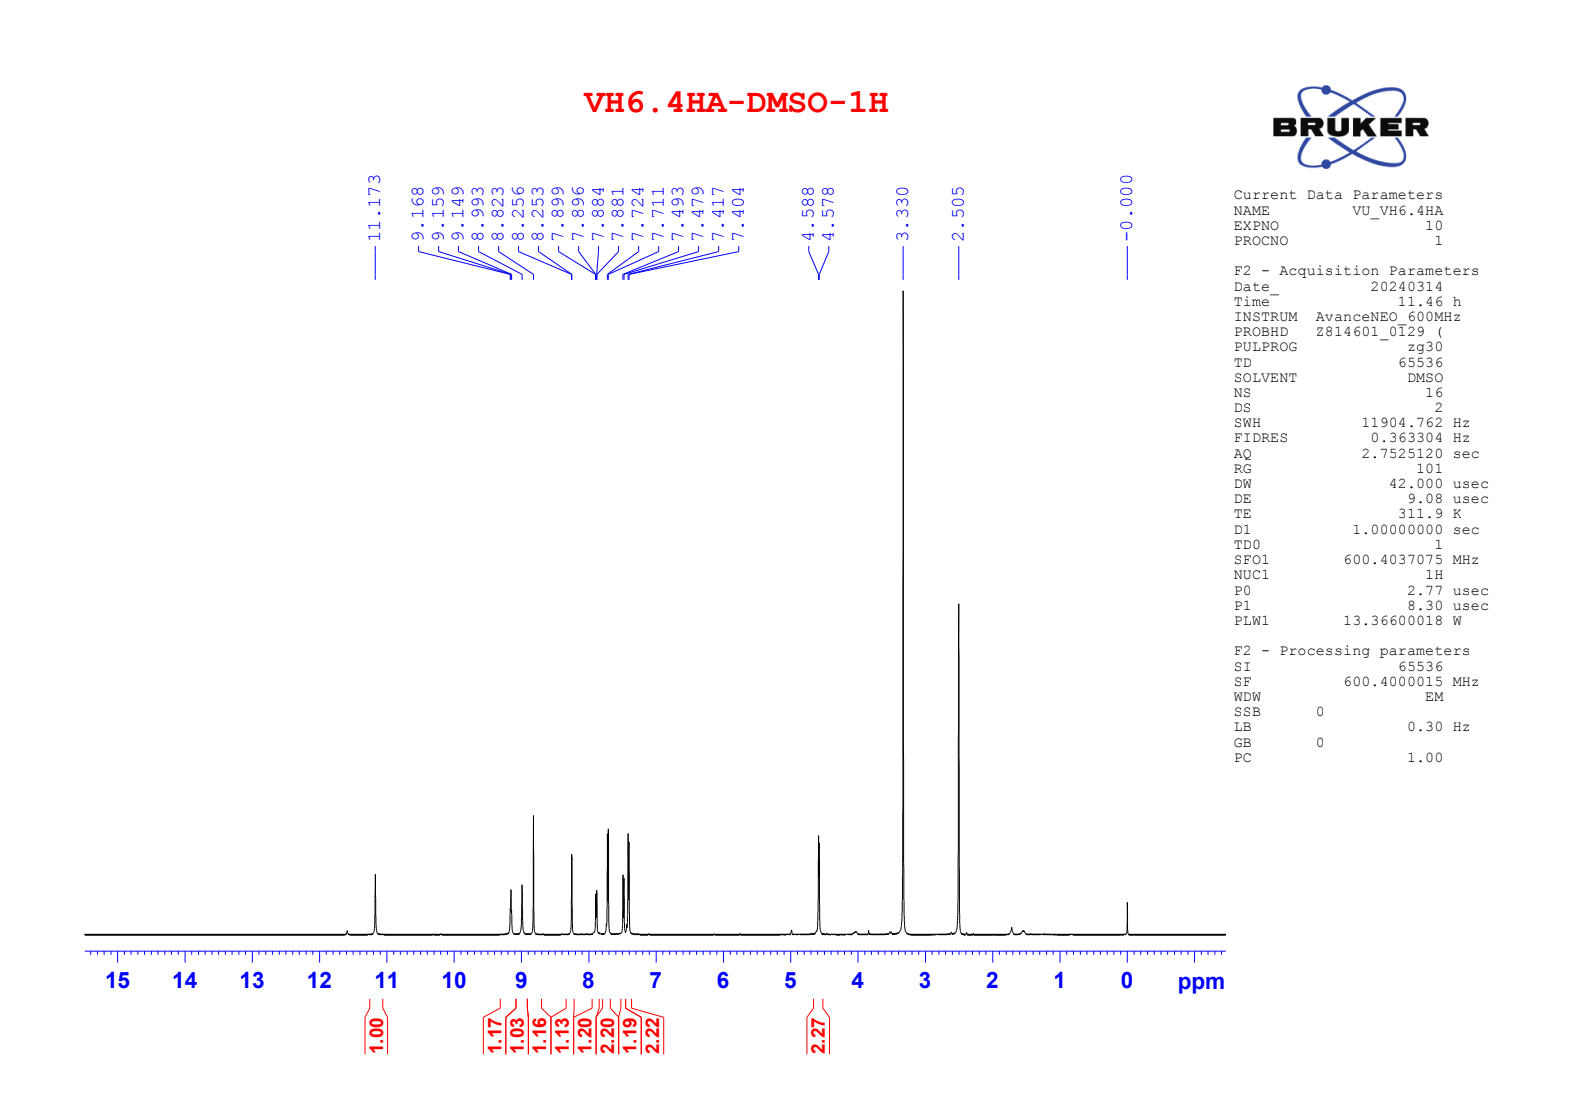
**

**Figure S59. 13C NMR of compound 6f**


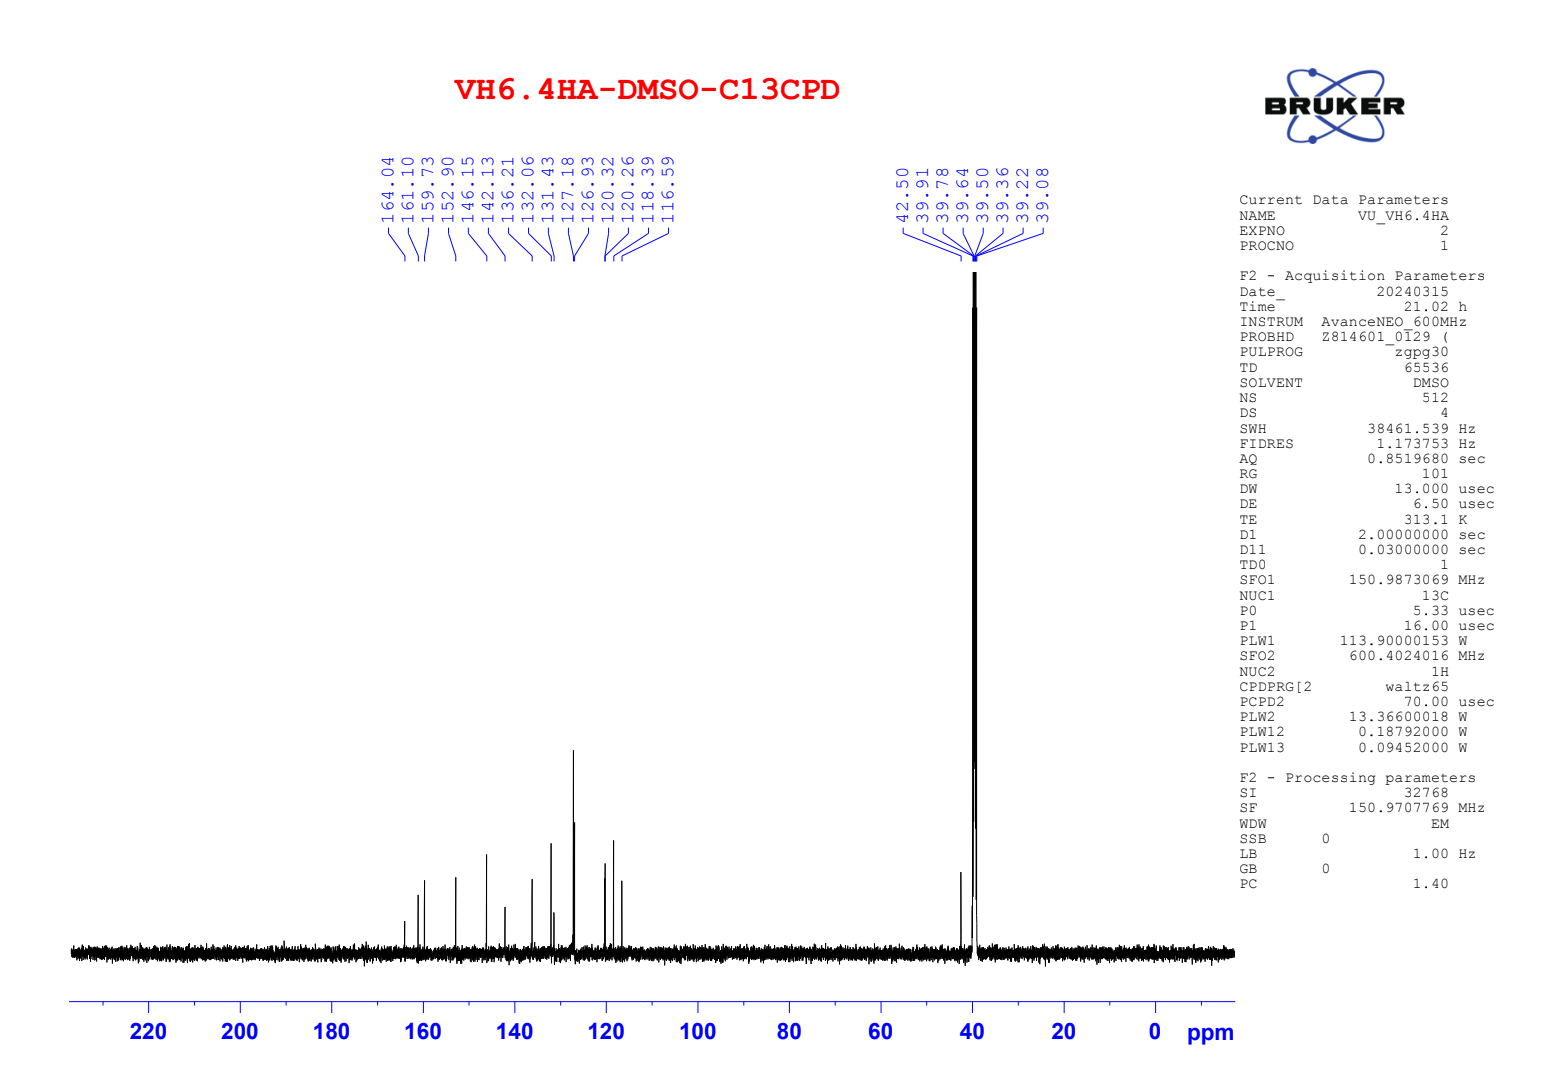


**Figure S60. 1H NMR of compound 6g**

**
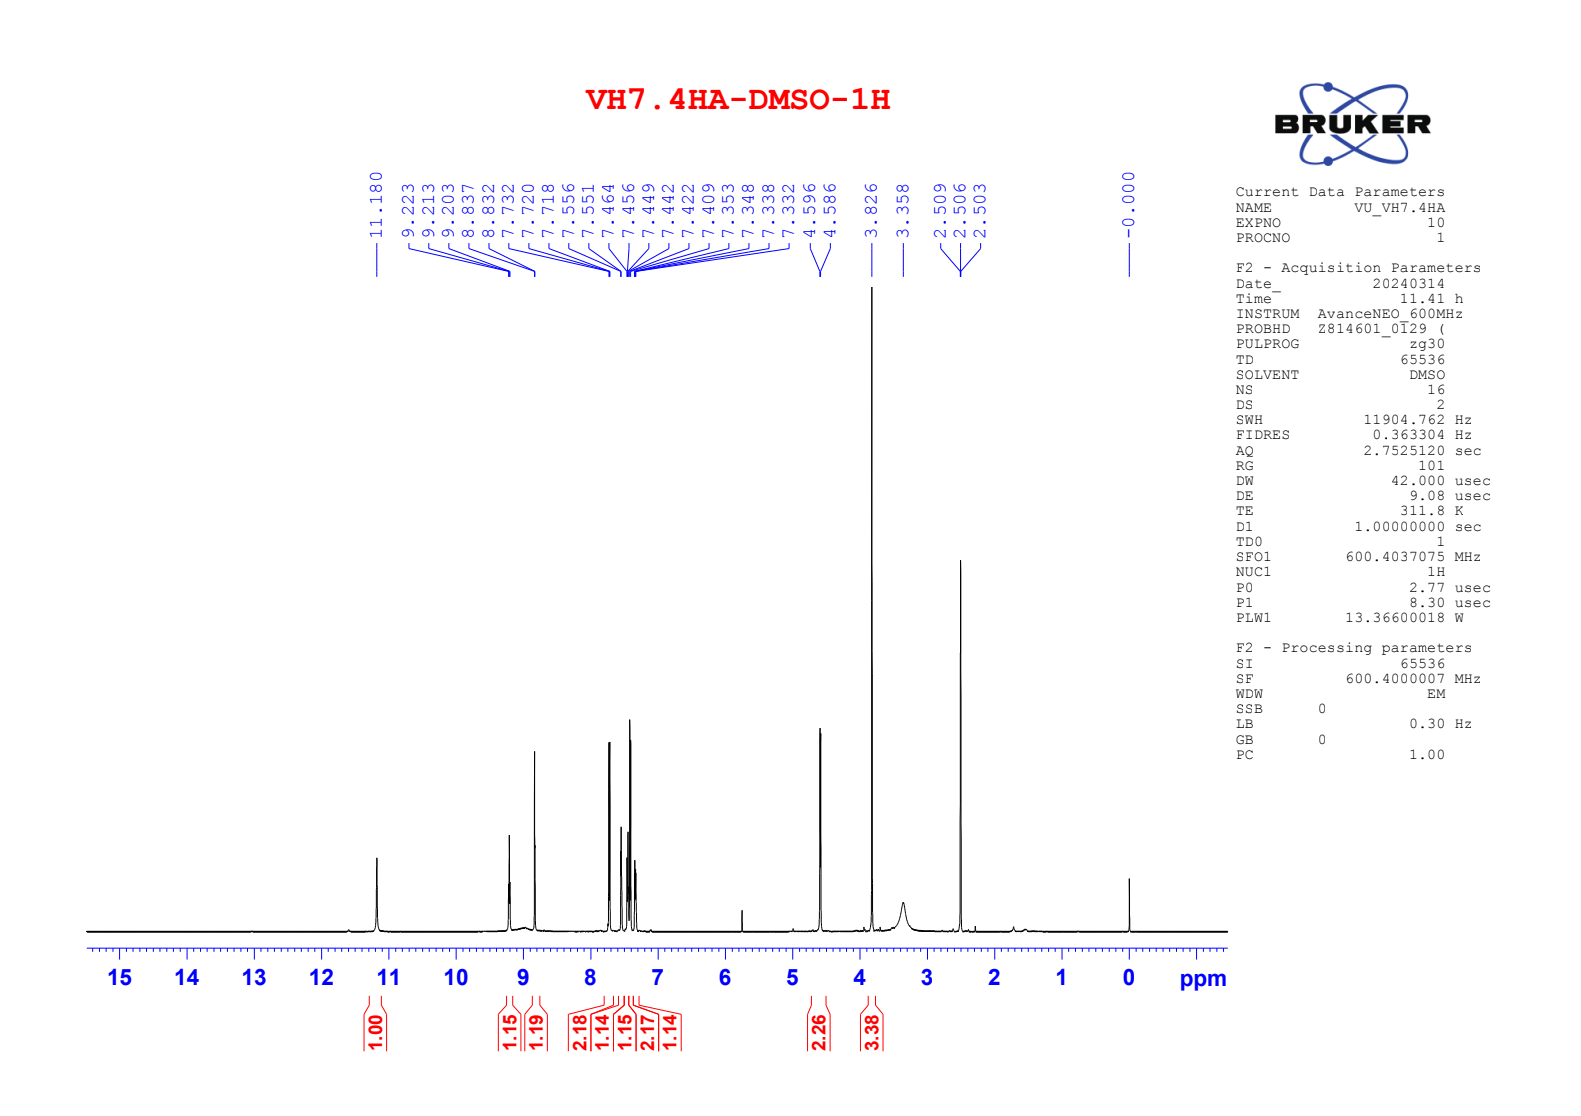
**

**Figure S61. 13C NMR of compound 6g**

**
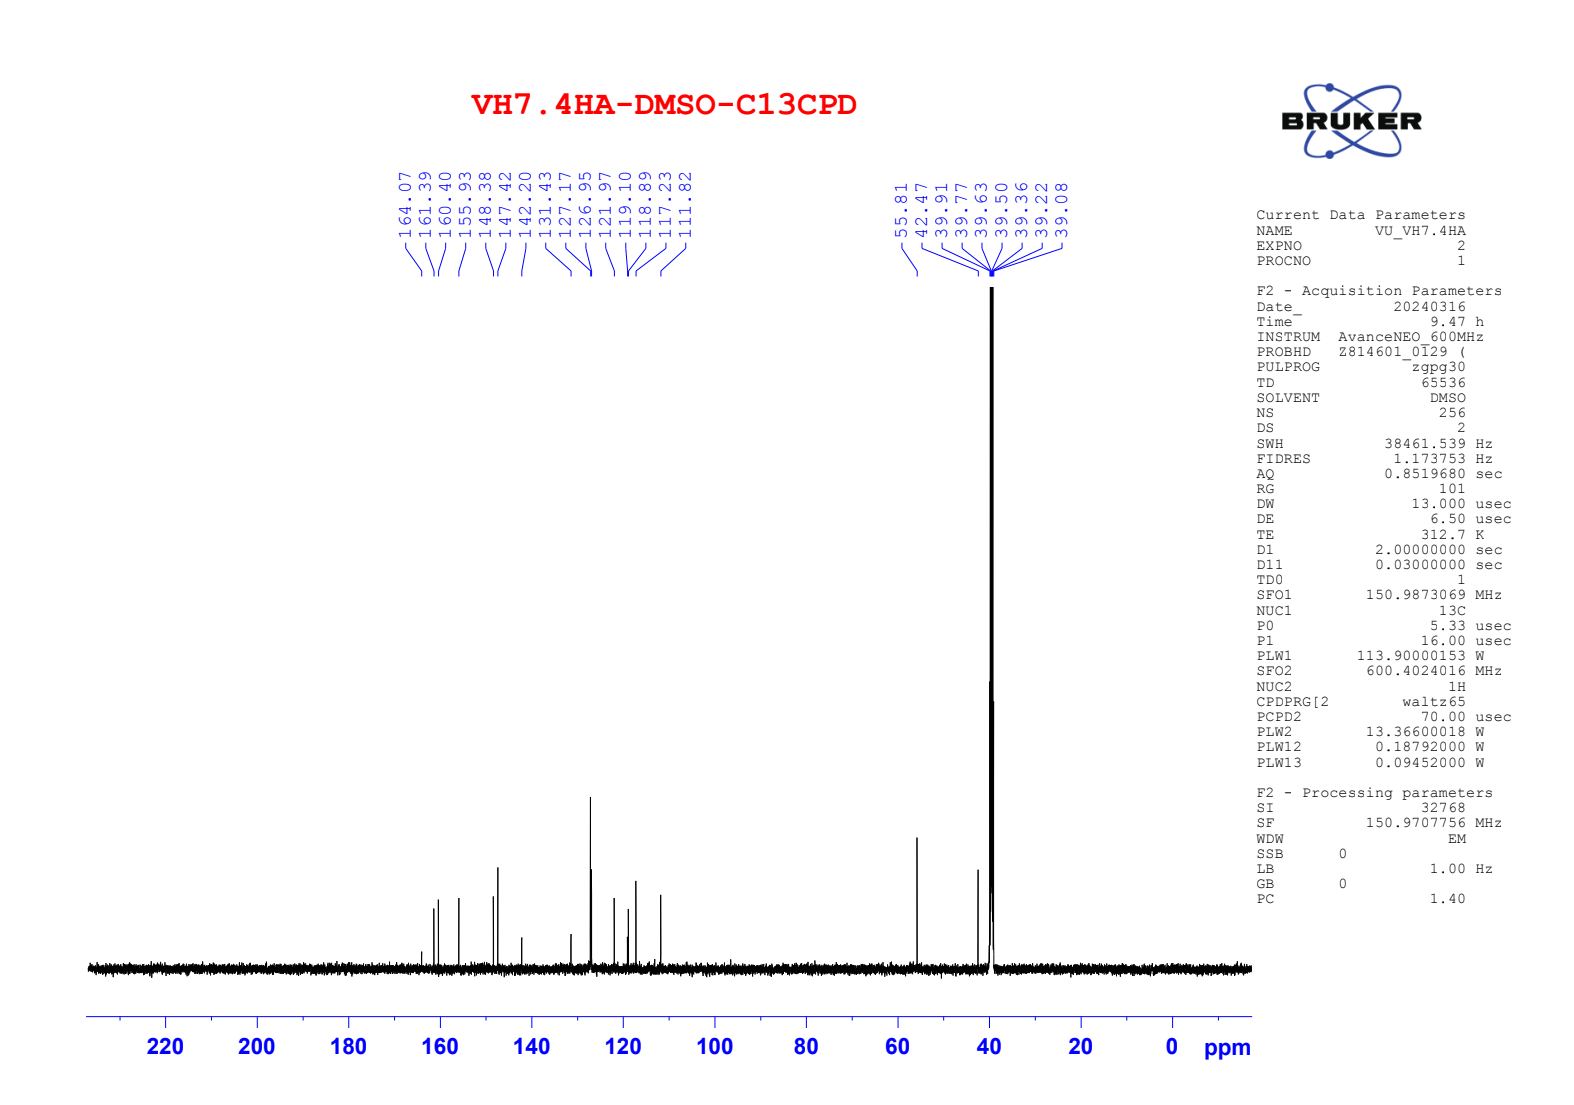
**

**Figure S62. 1H NMR of compound 7a**

**
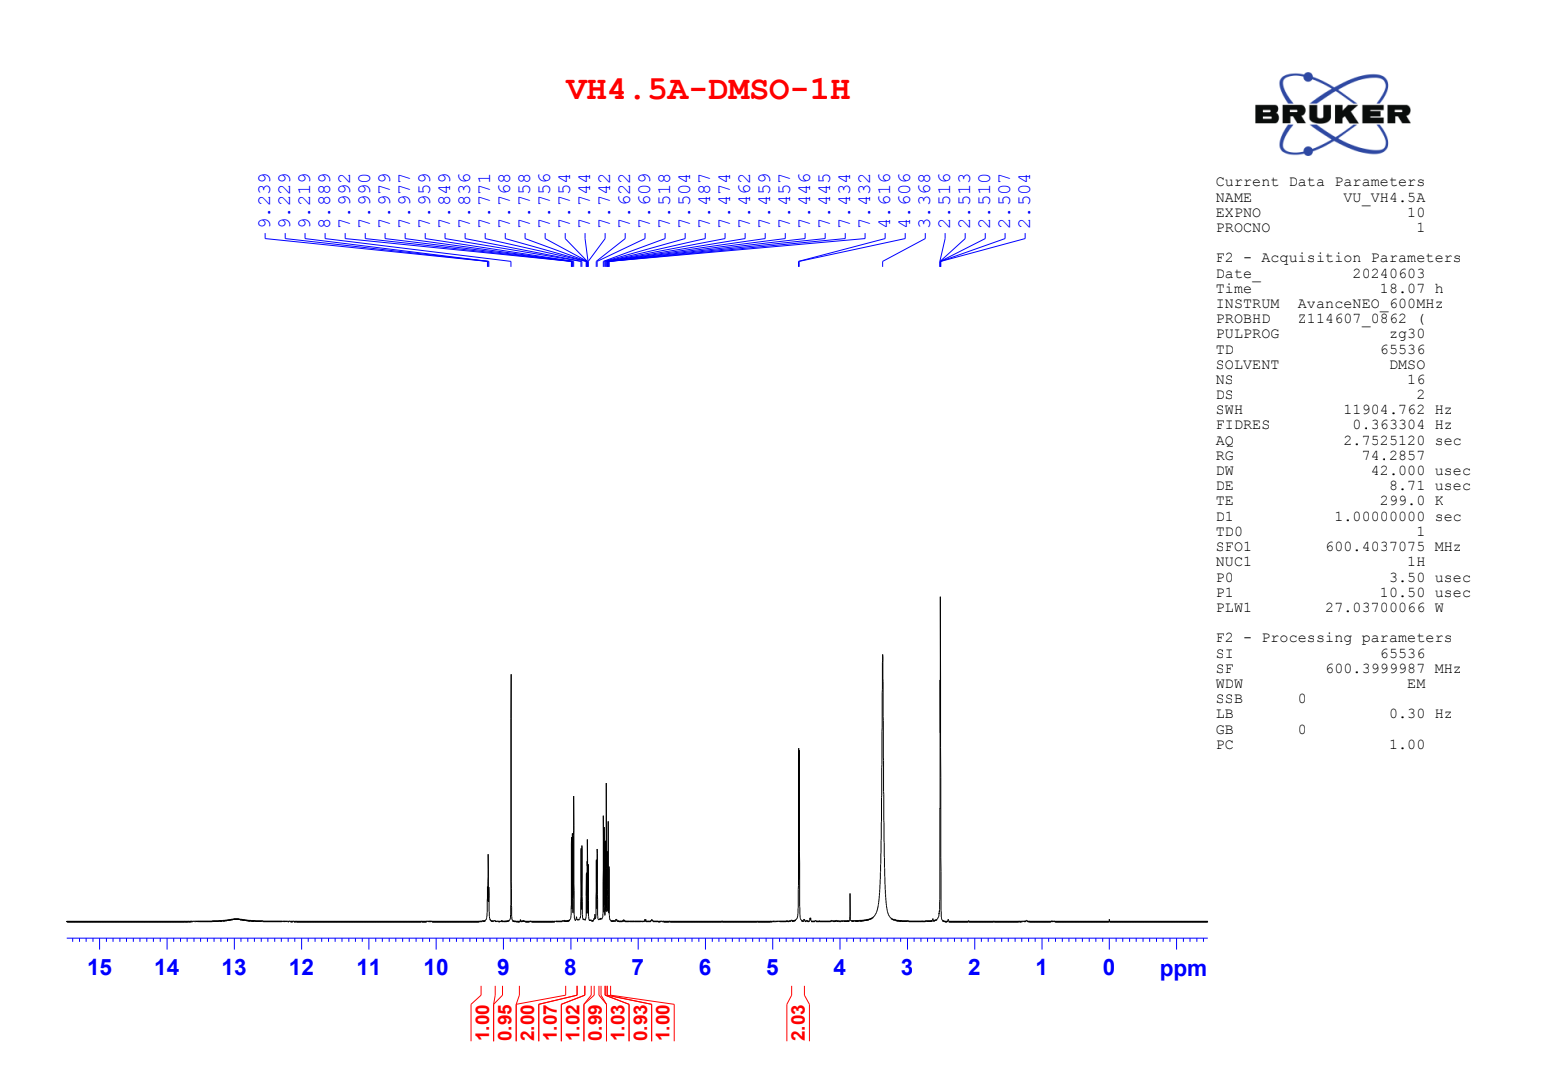
**

**Figure S63. 13C NMR of compound 7a**


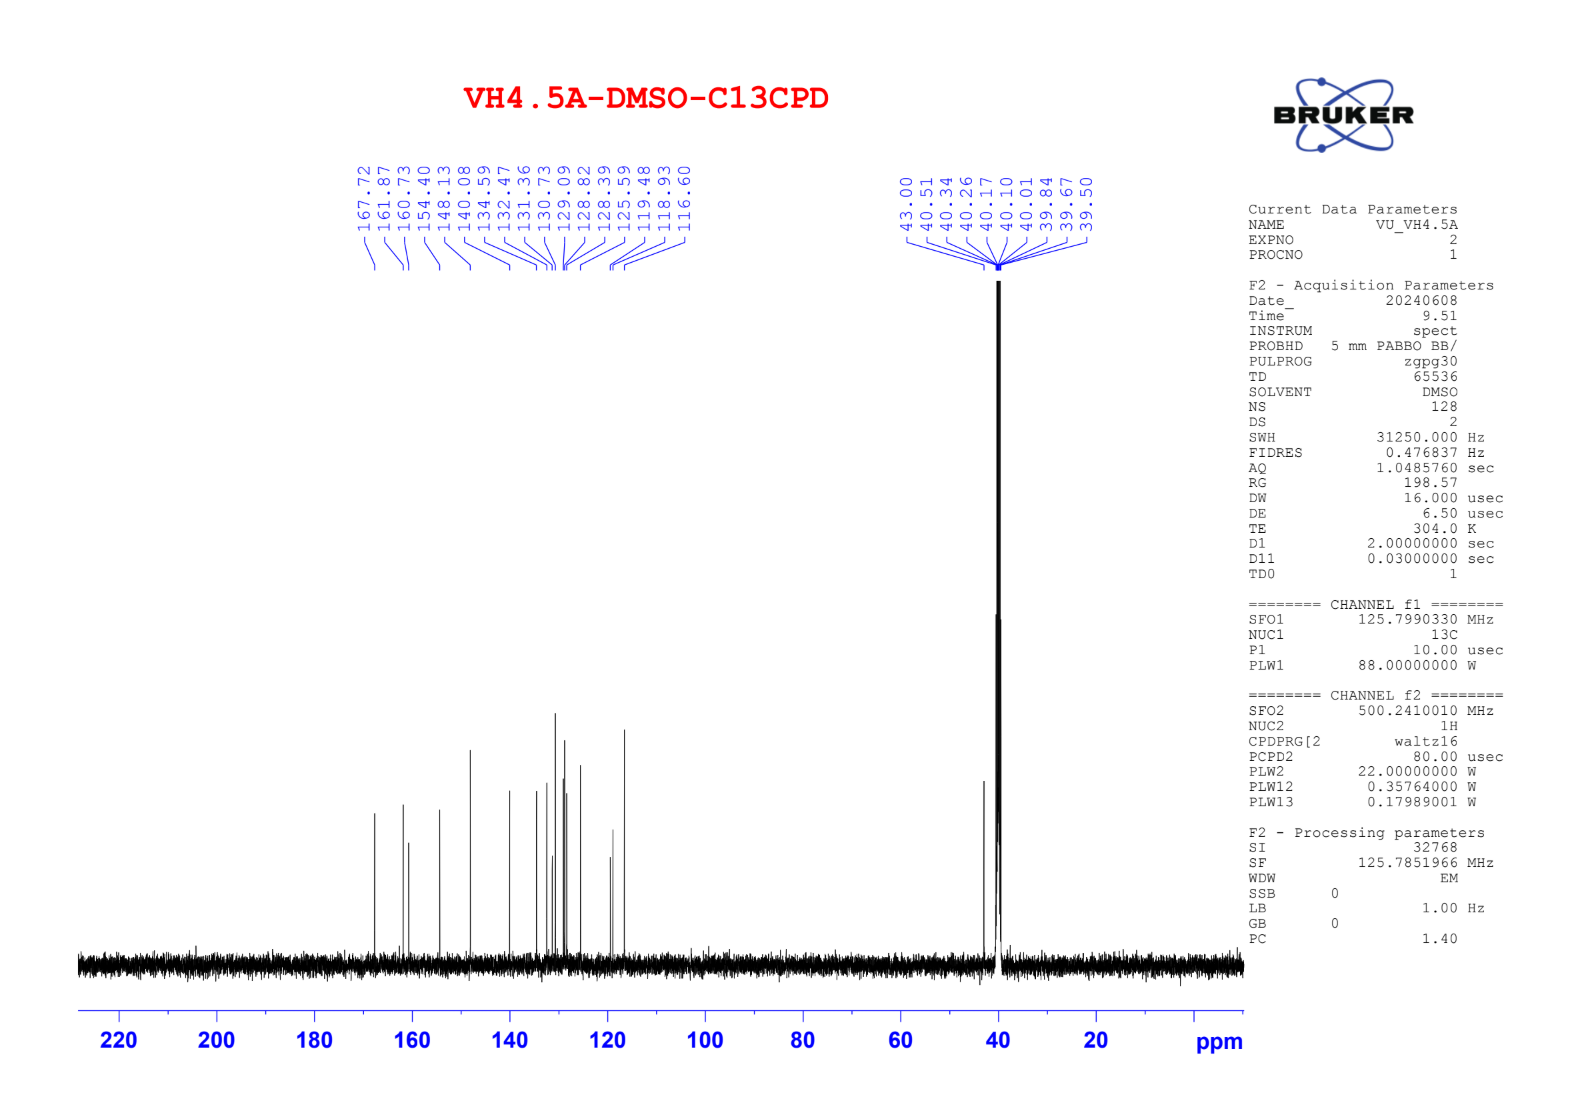


**Figure S64. 1H NMR of compound 7b**

**
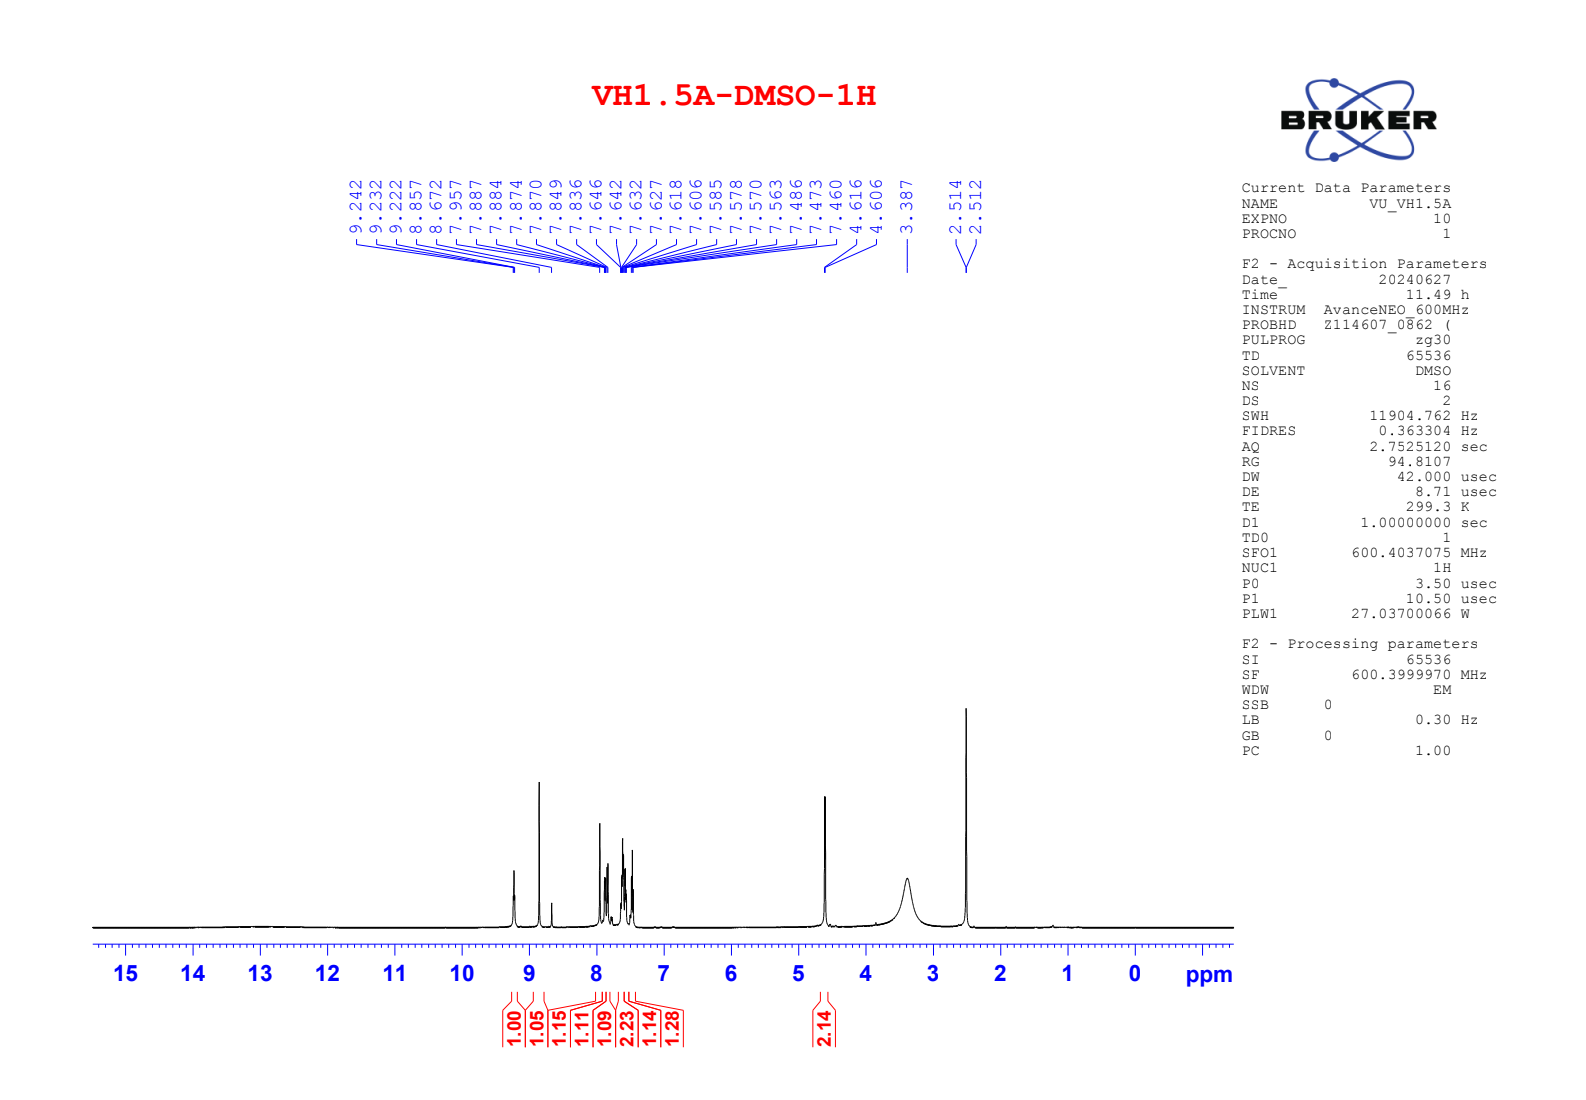
**

**Figure S65. 13C NMR of compound 7b**

**
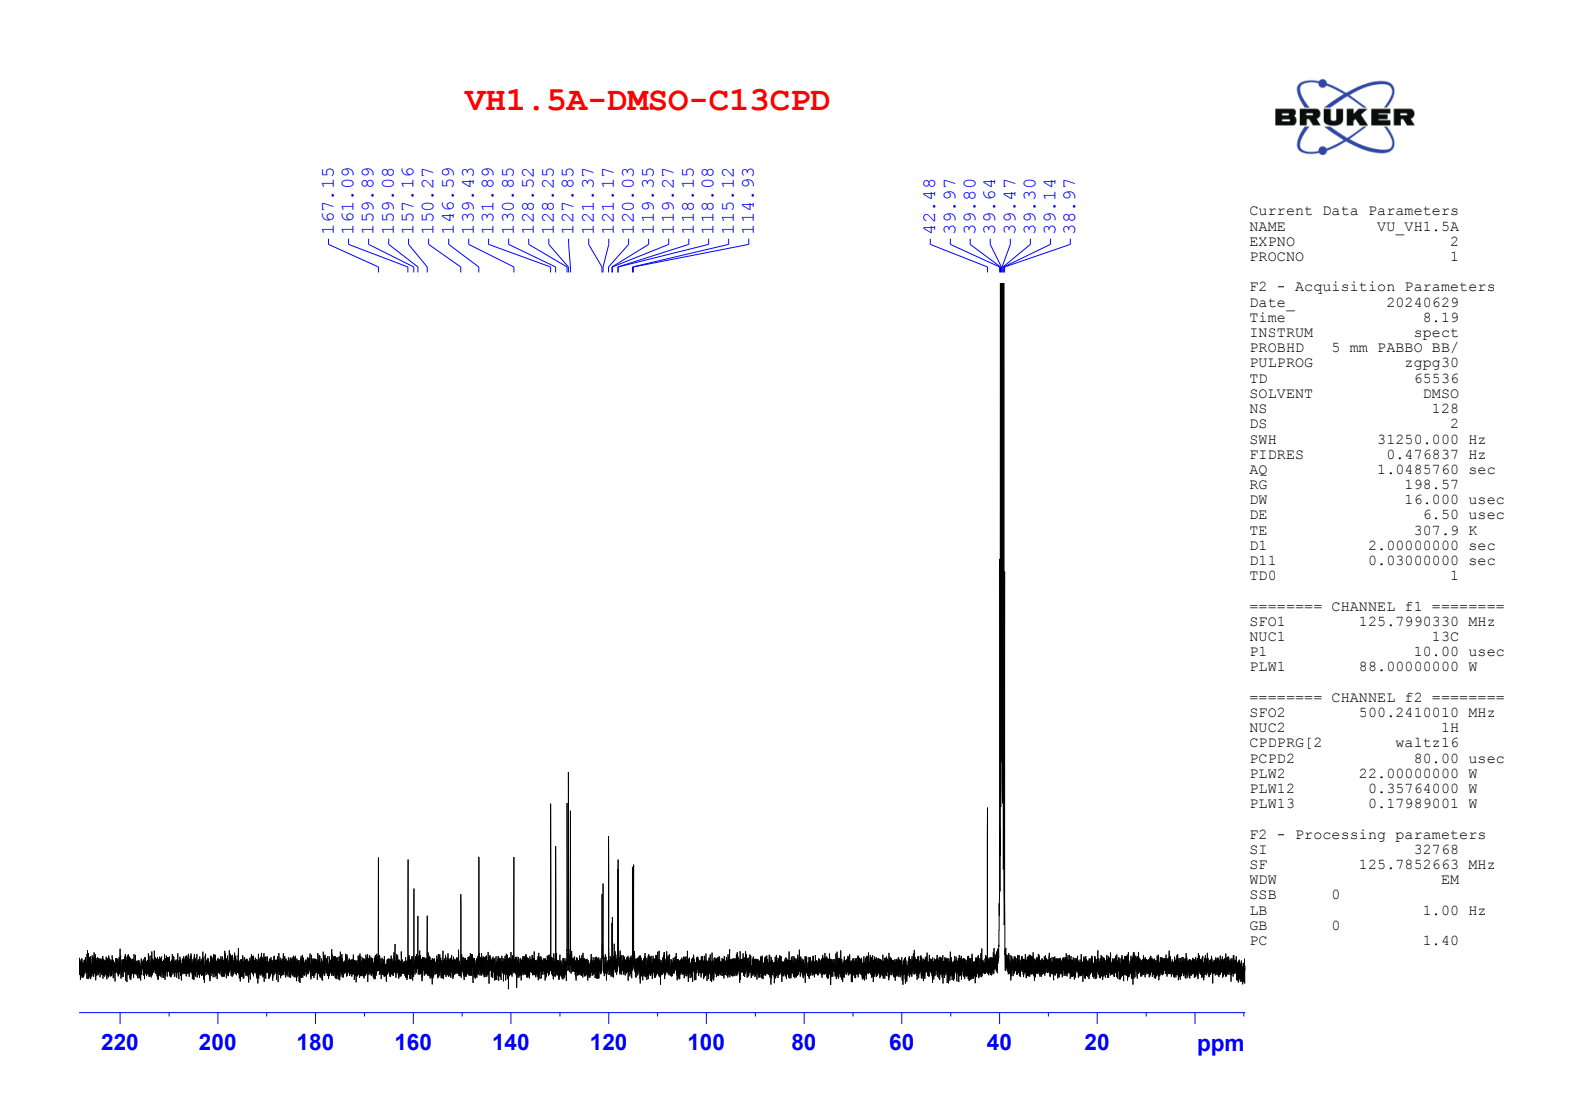
**

**Figure S66. 1H NMR of compound 7c**

**
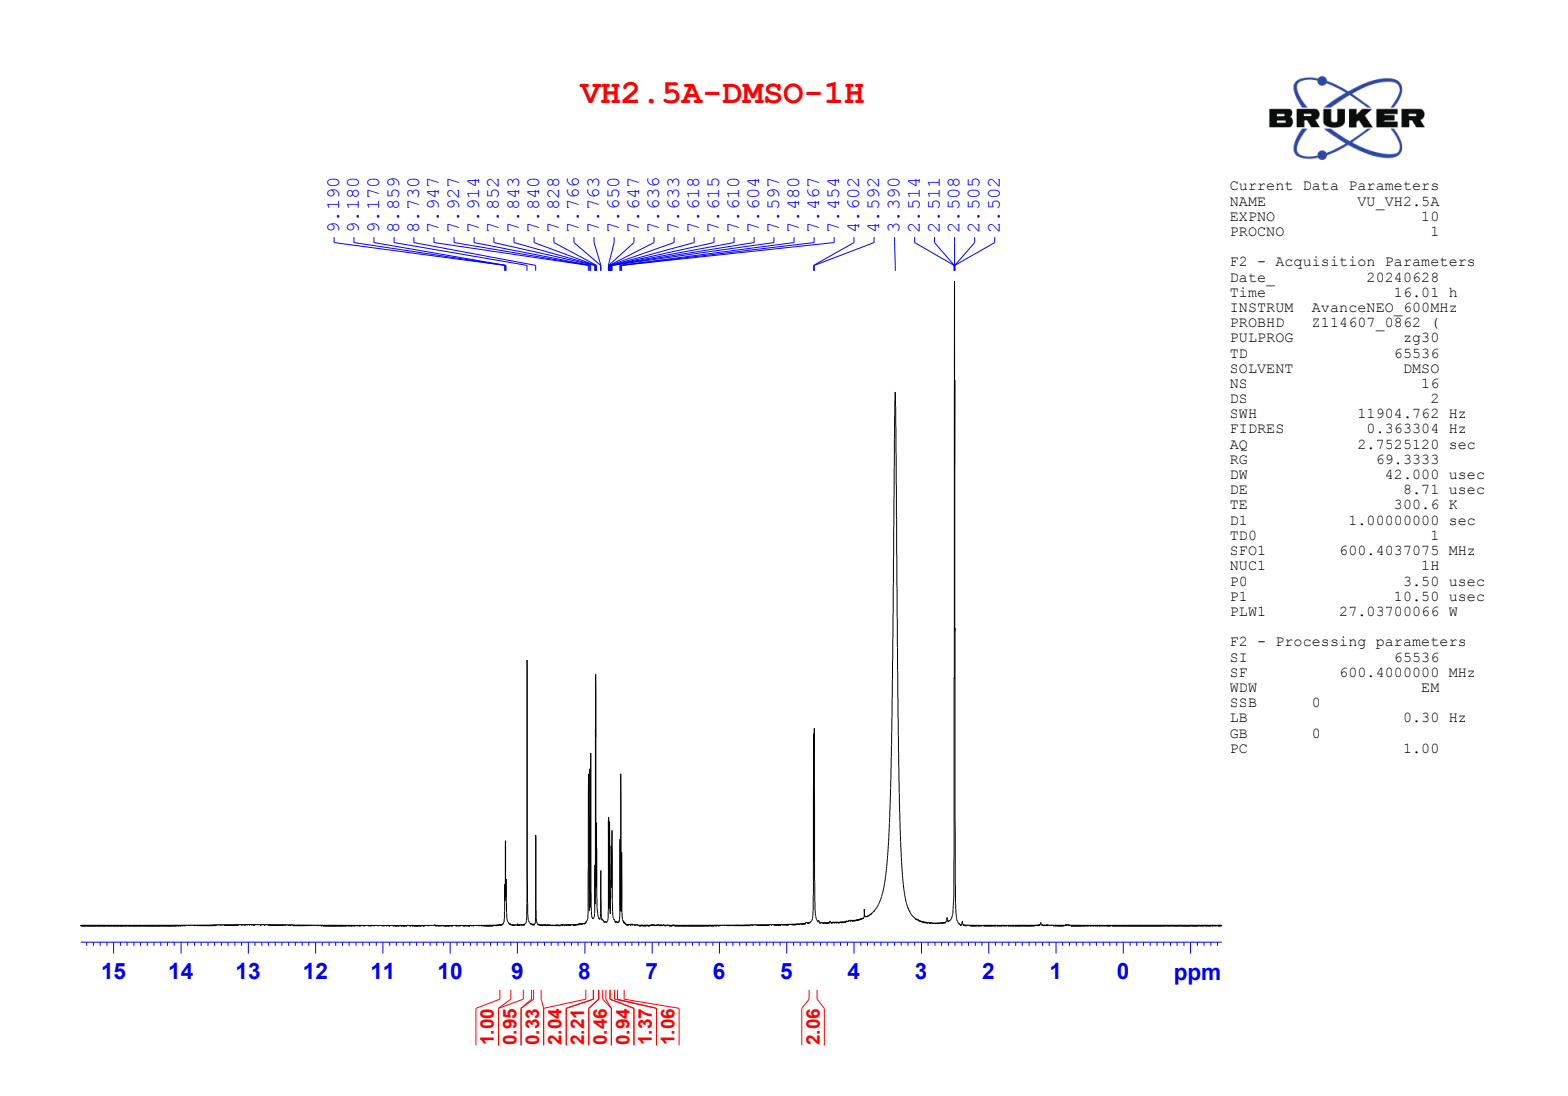
**

**Figure S67. 13C NMR of compound 7c**

**
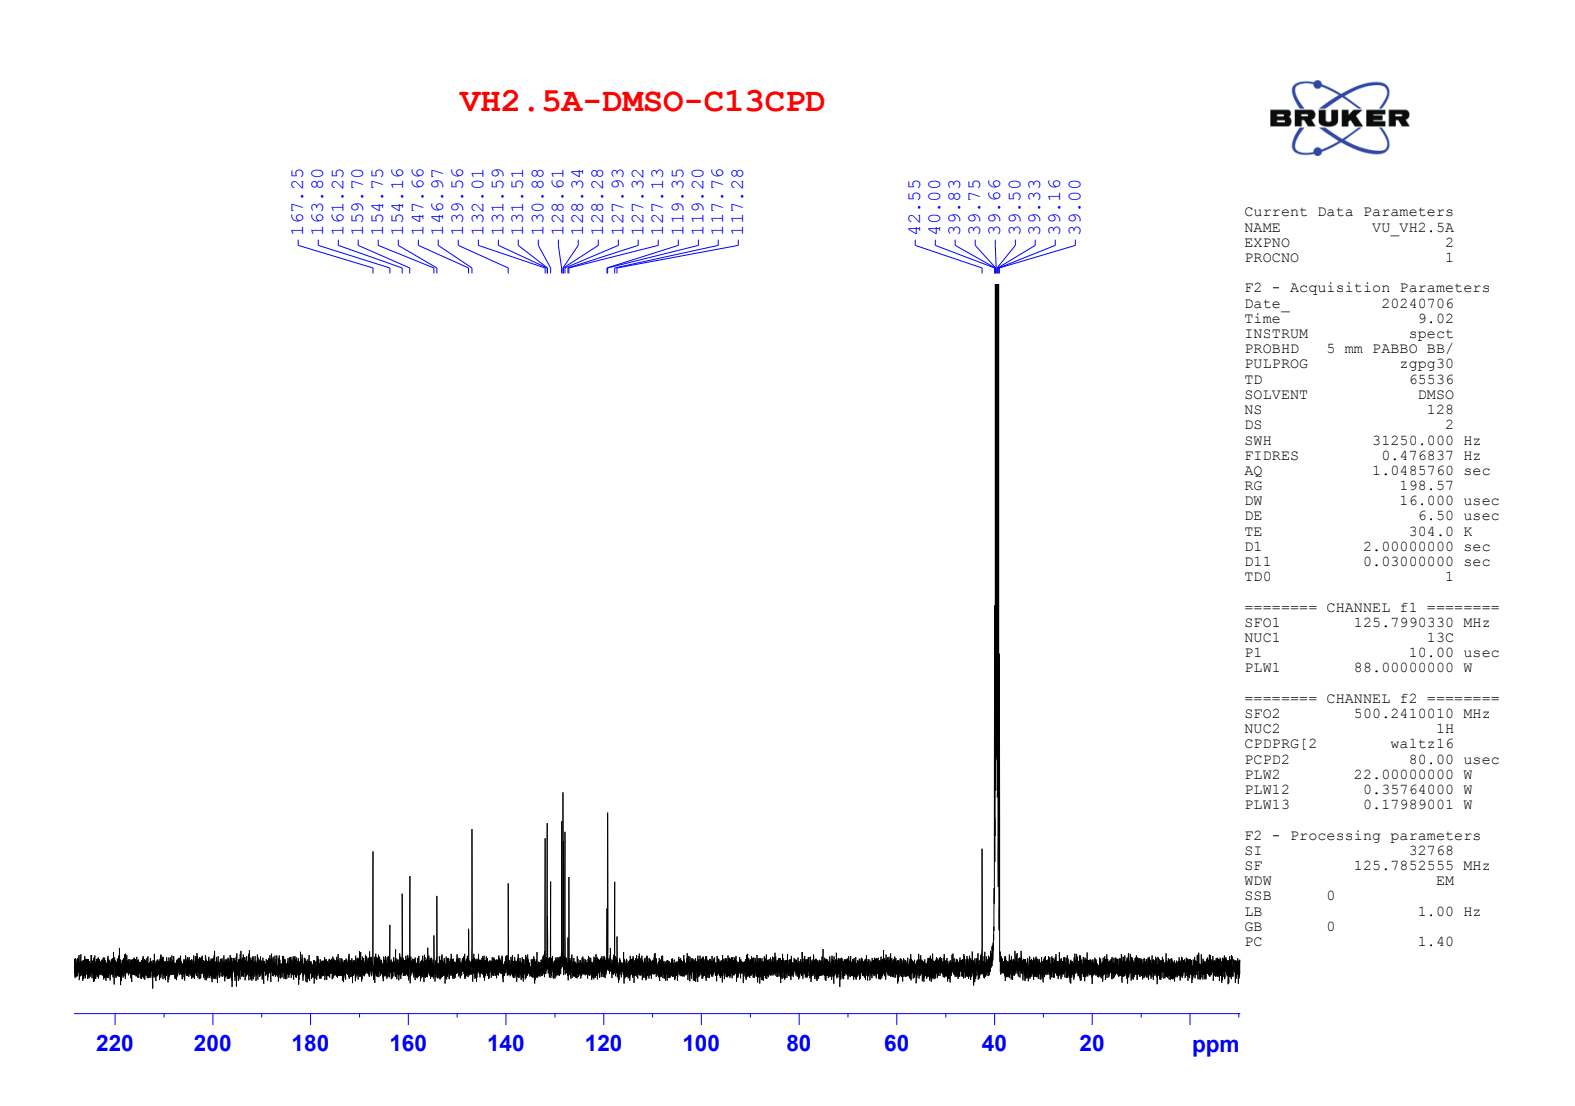
**

**Figure S68. 1H NMR of compound 7d**


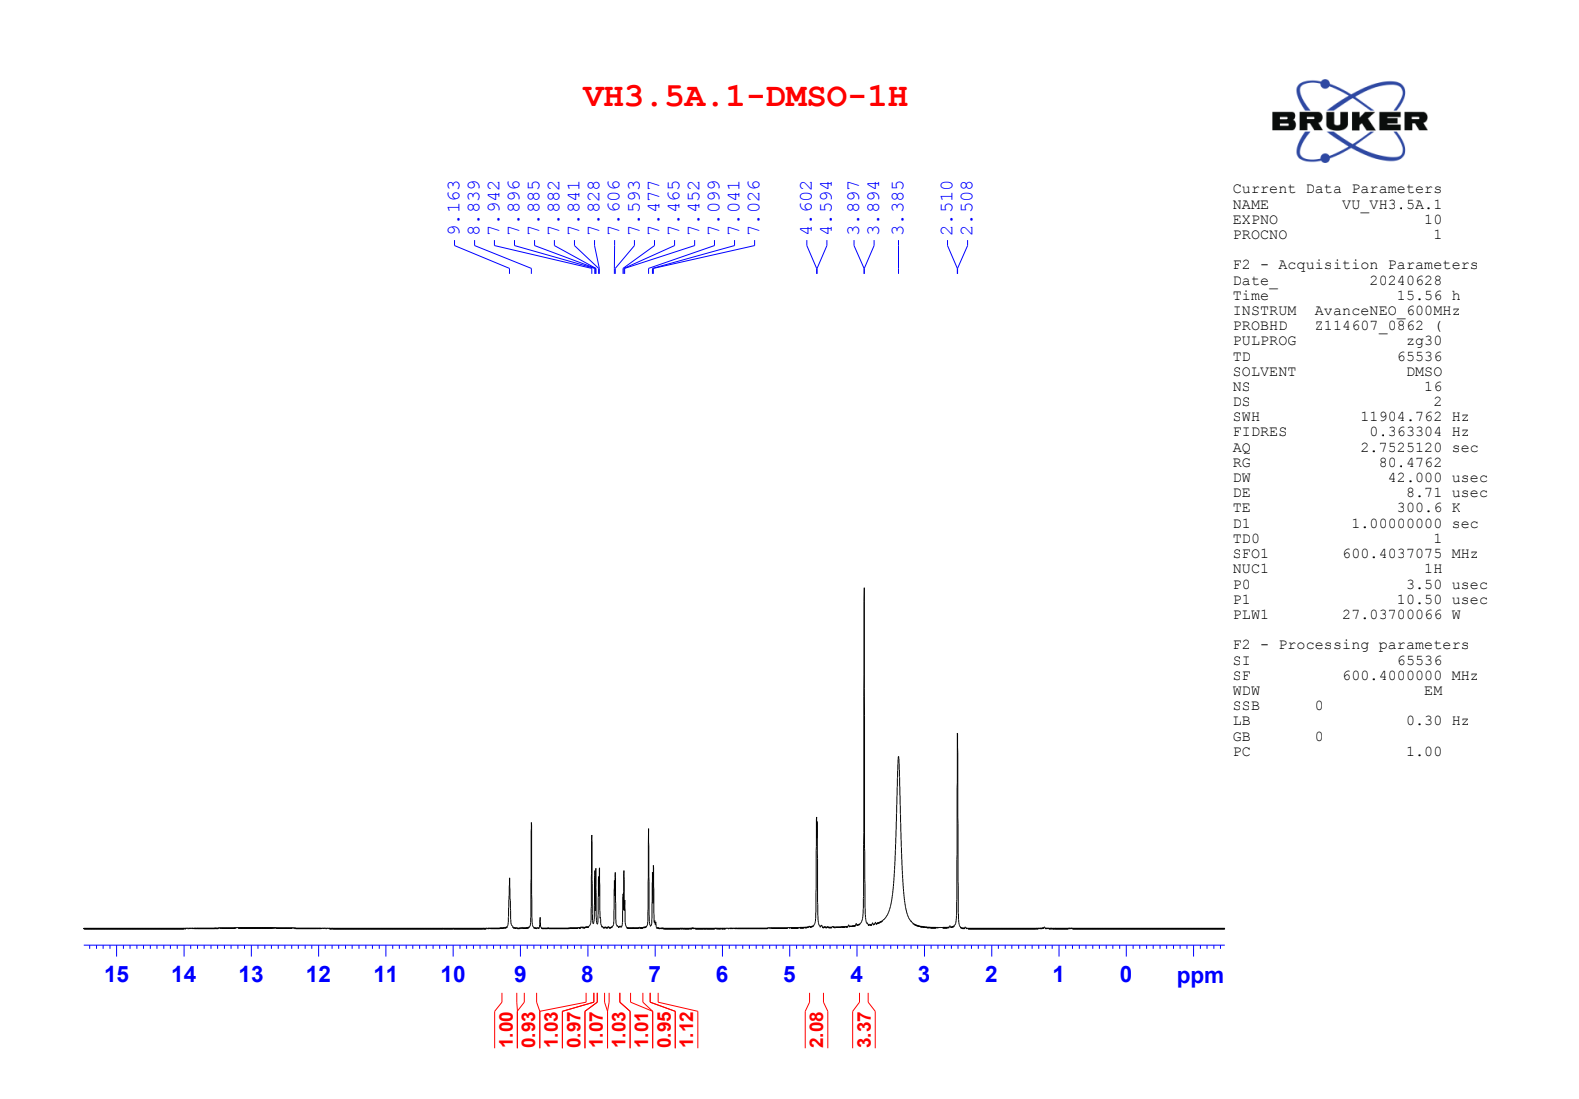


**Figure S69. 13C NMR of compound 7d**

**
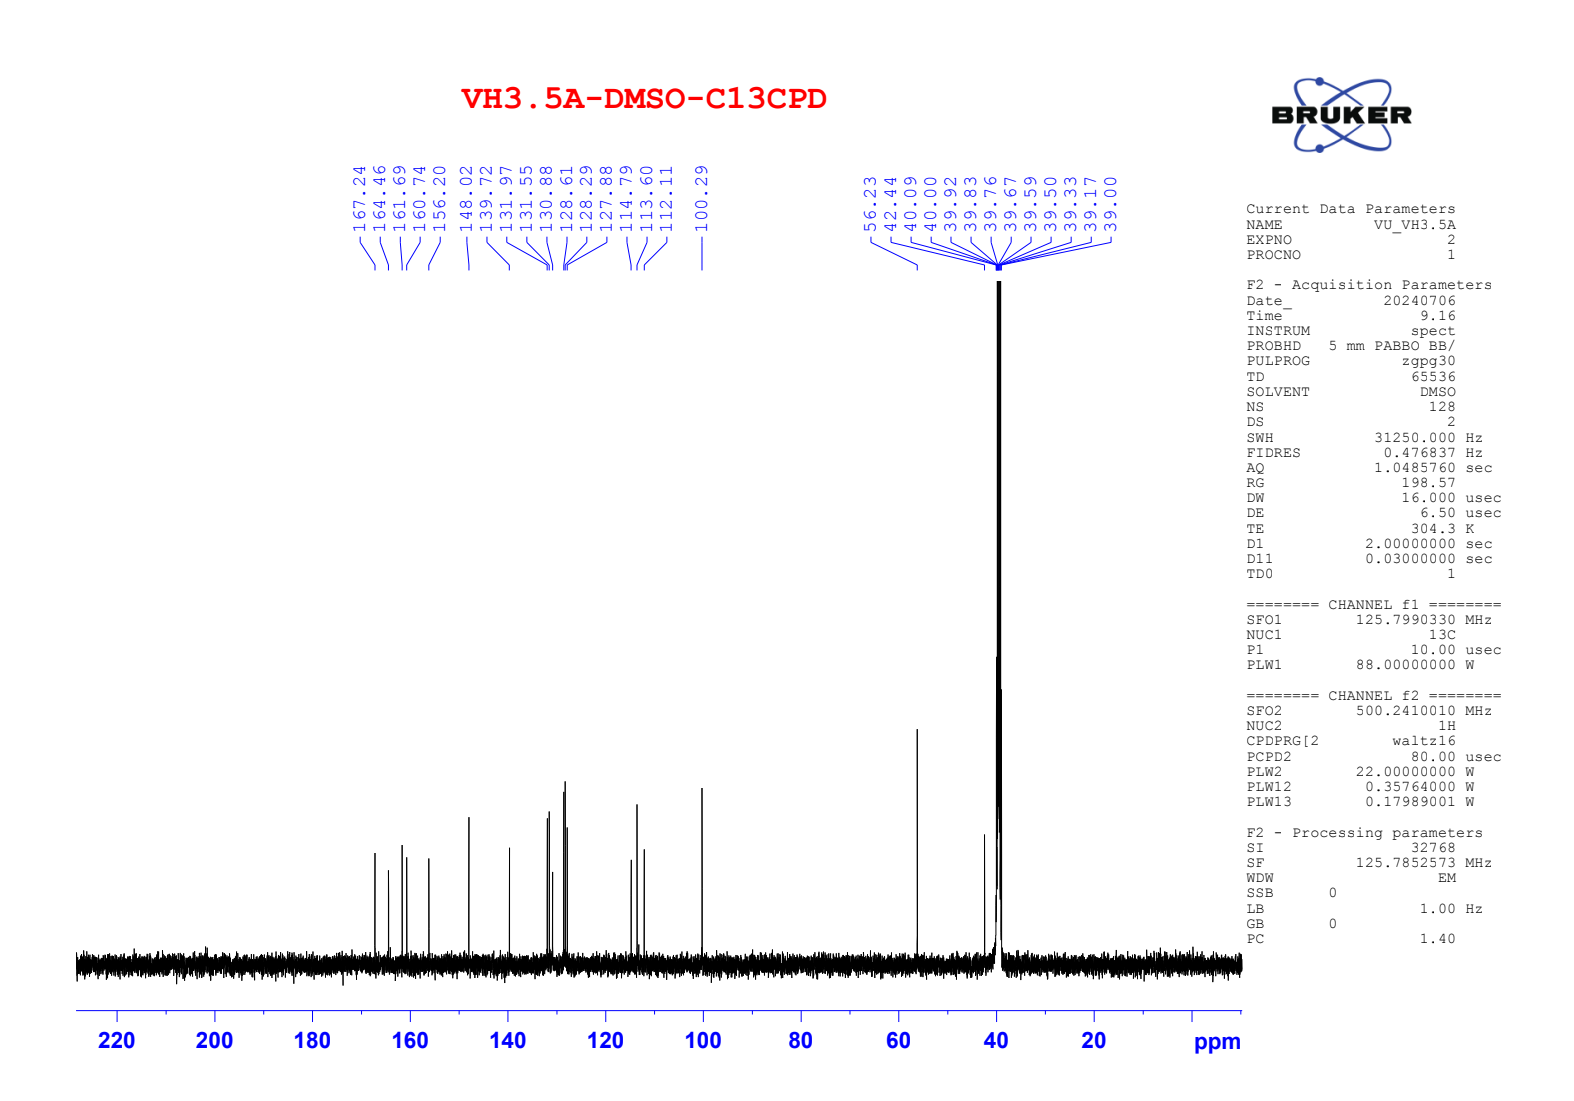
**

**Figure S70. 1H NMR of compound 7e**


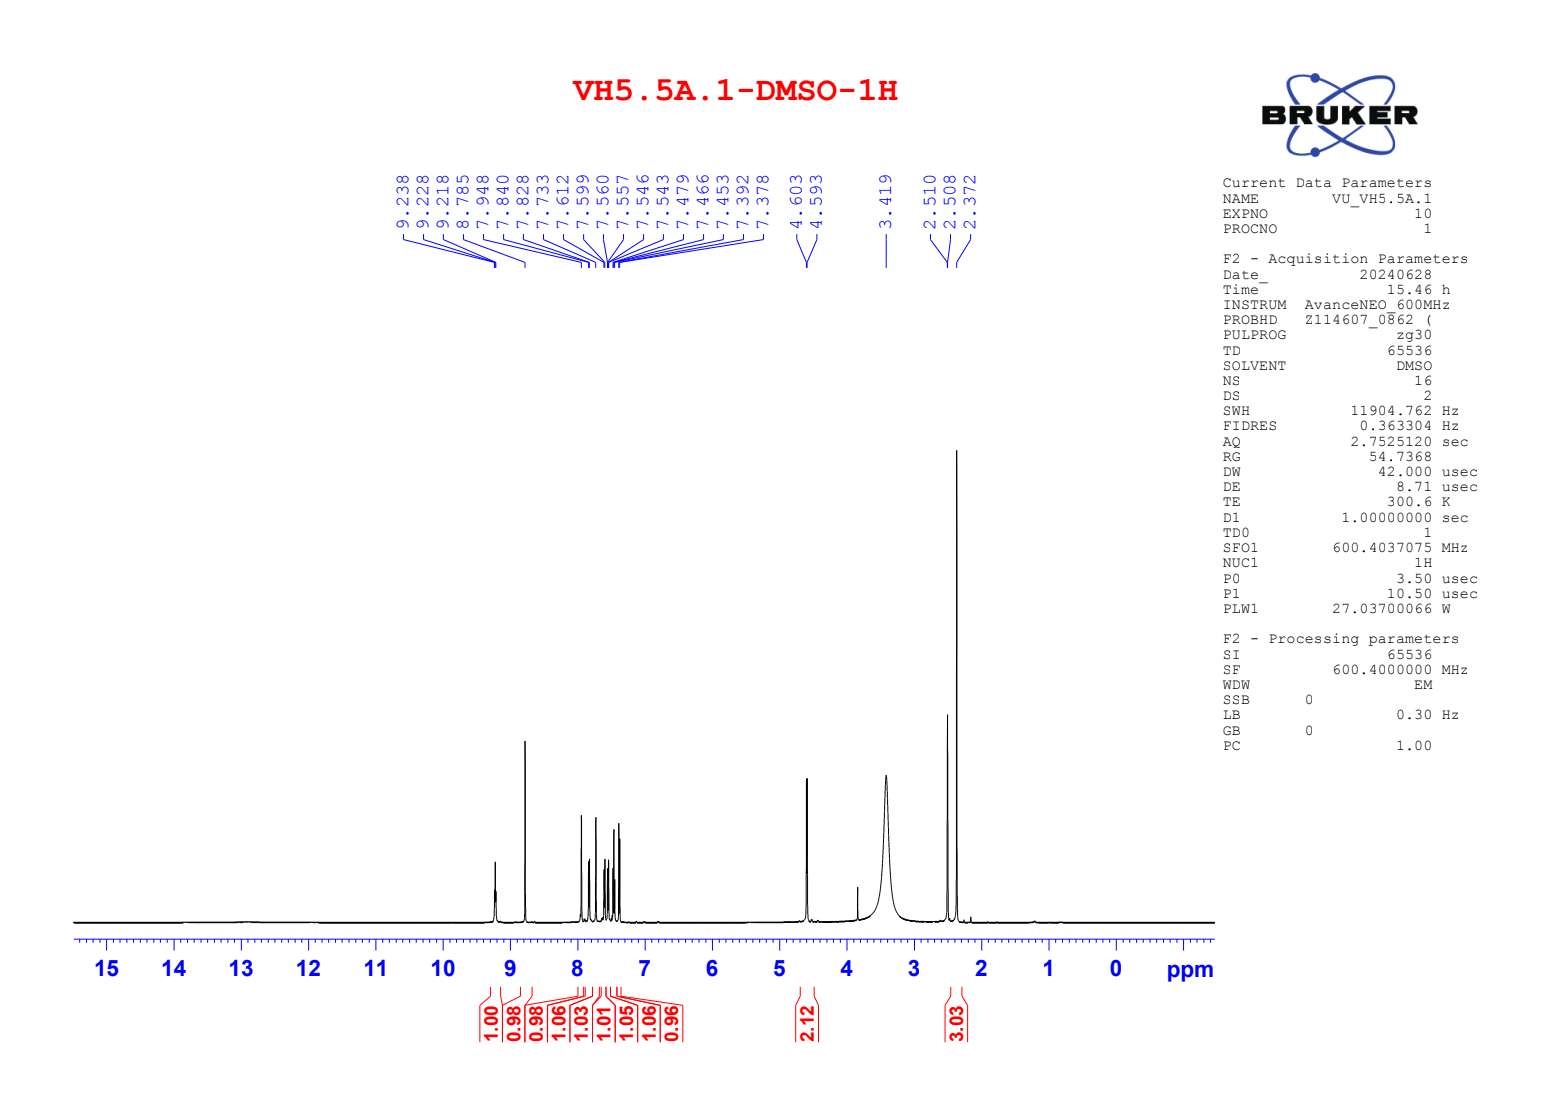


**Figure S71. 13C NMR of compound 7e**

**
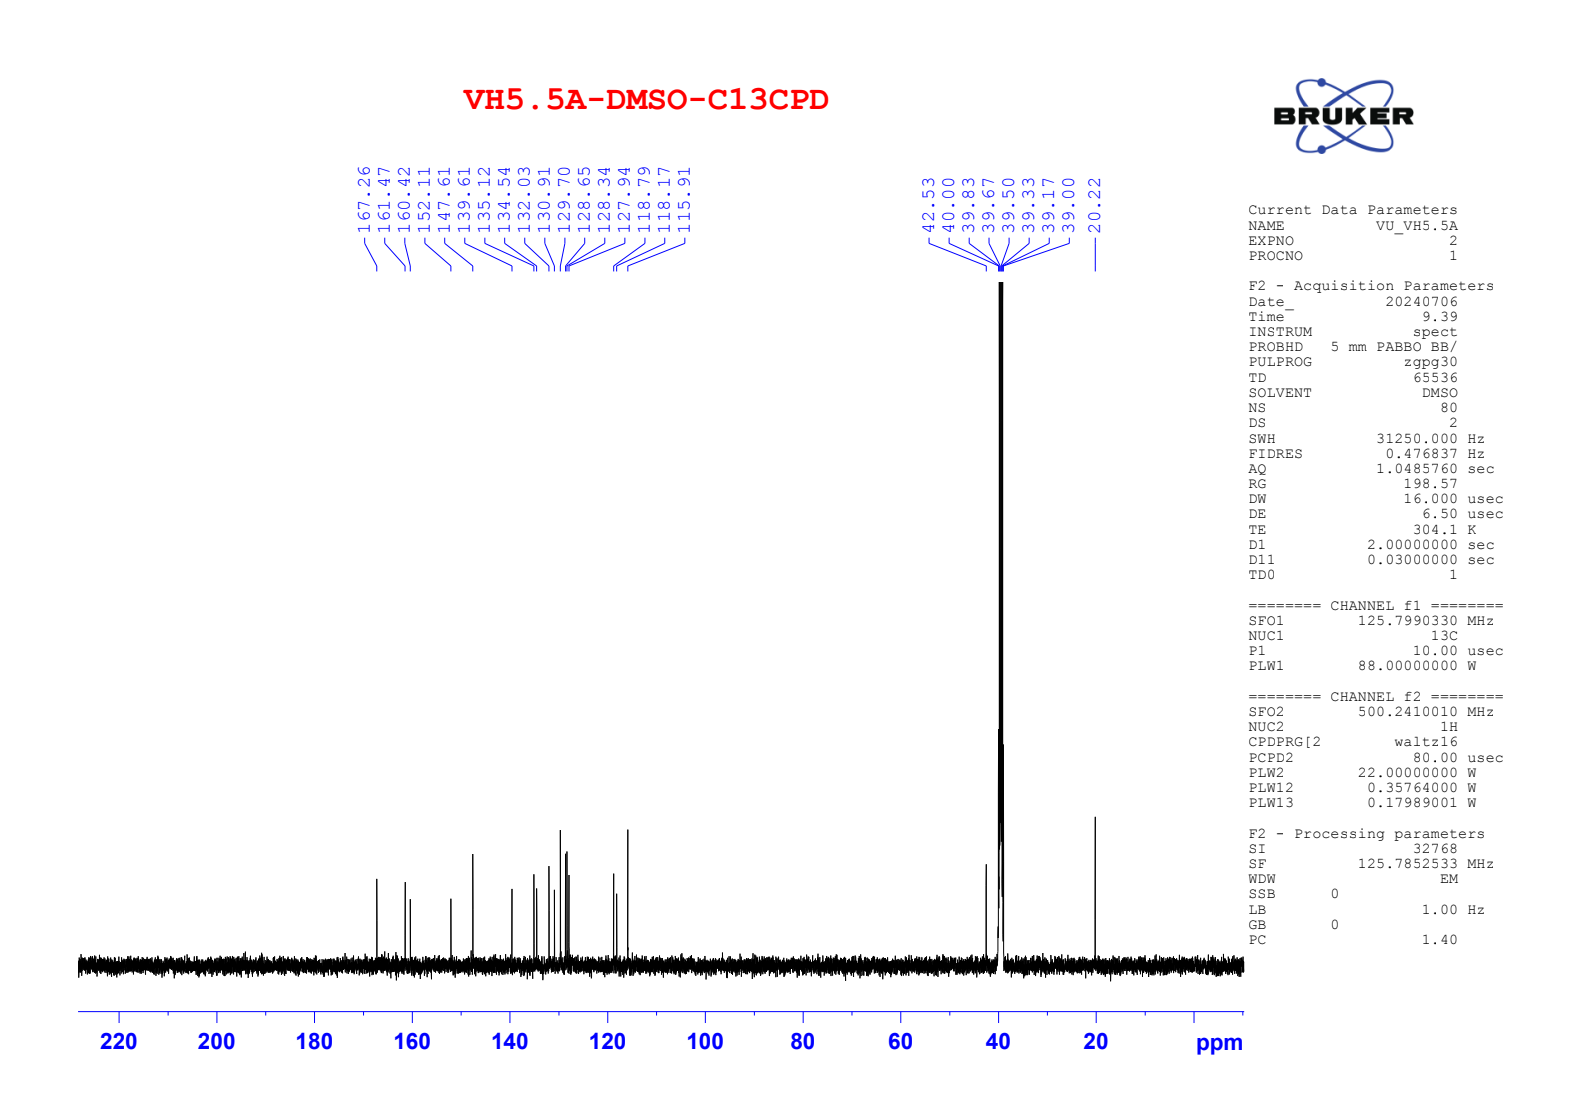
**

**Figure S72. 1H NMR of compound 7f**

**
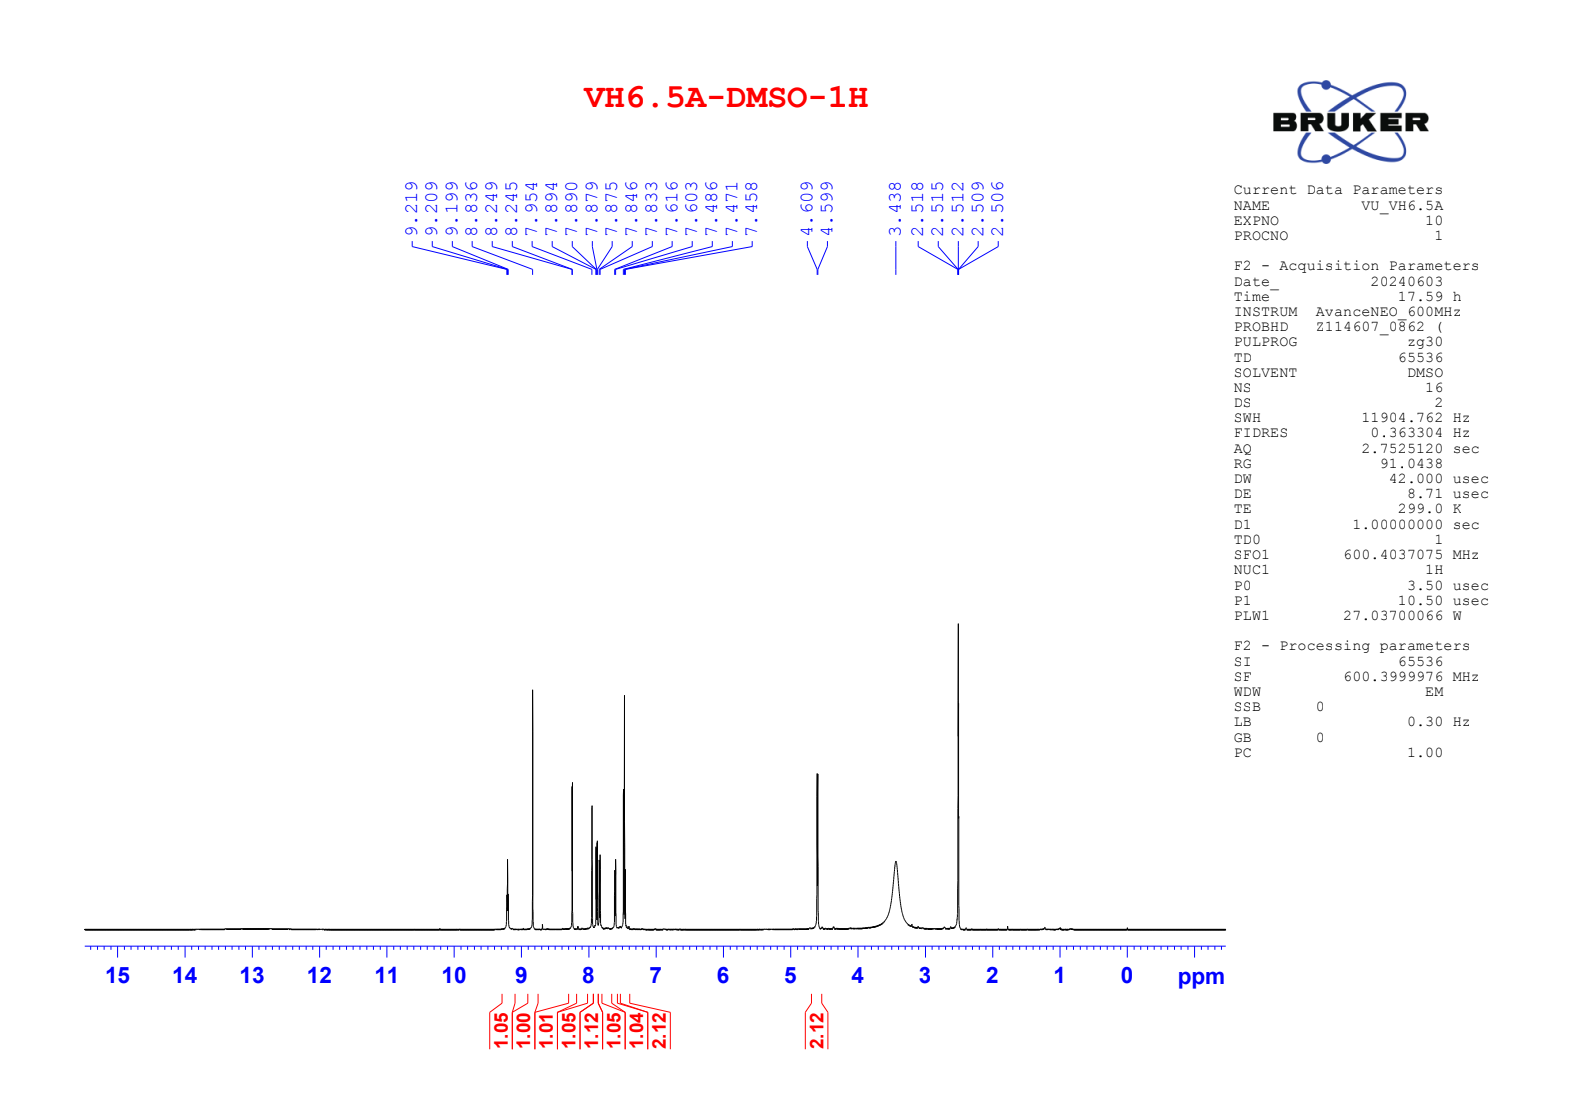
**

**Figure S73. 13C NMR of compound 7f**

**
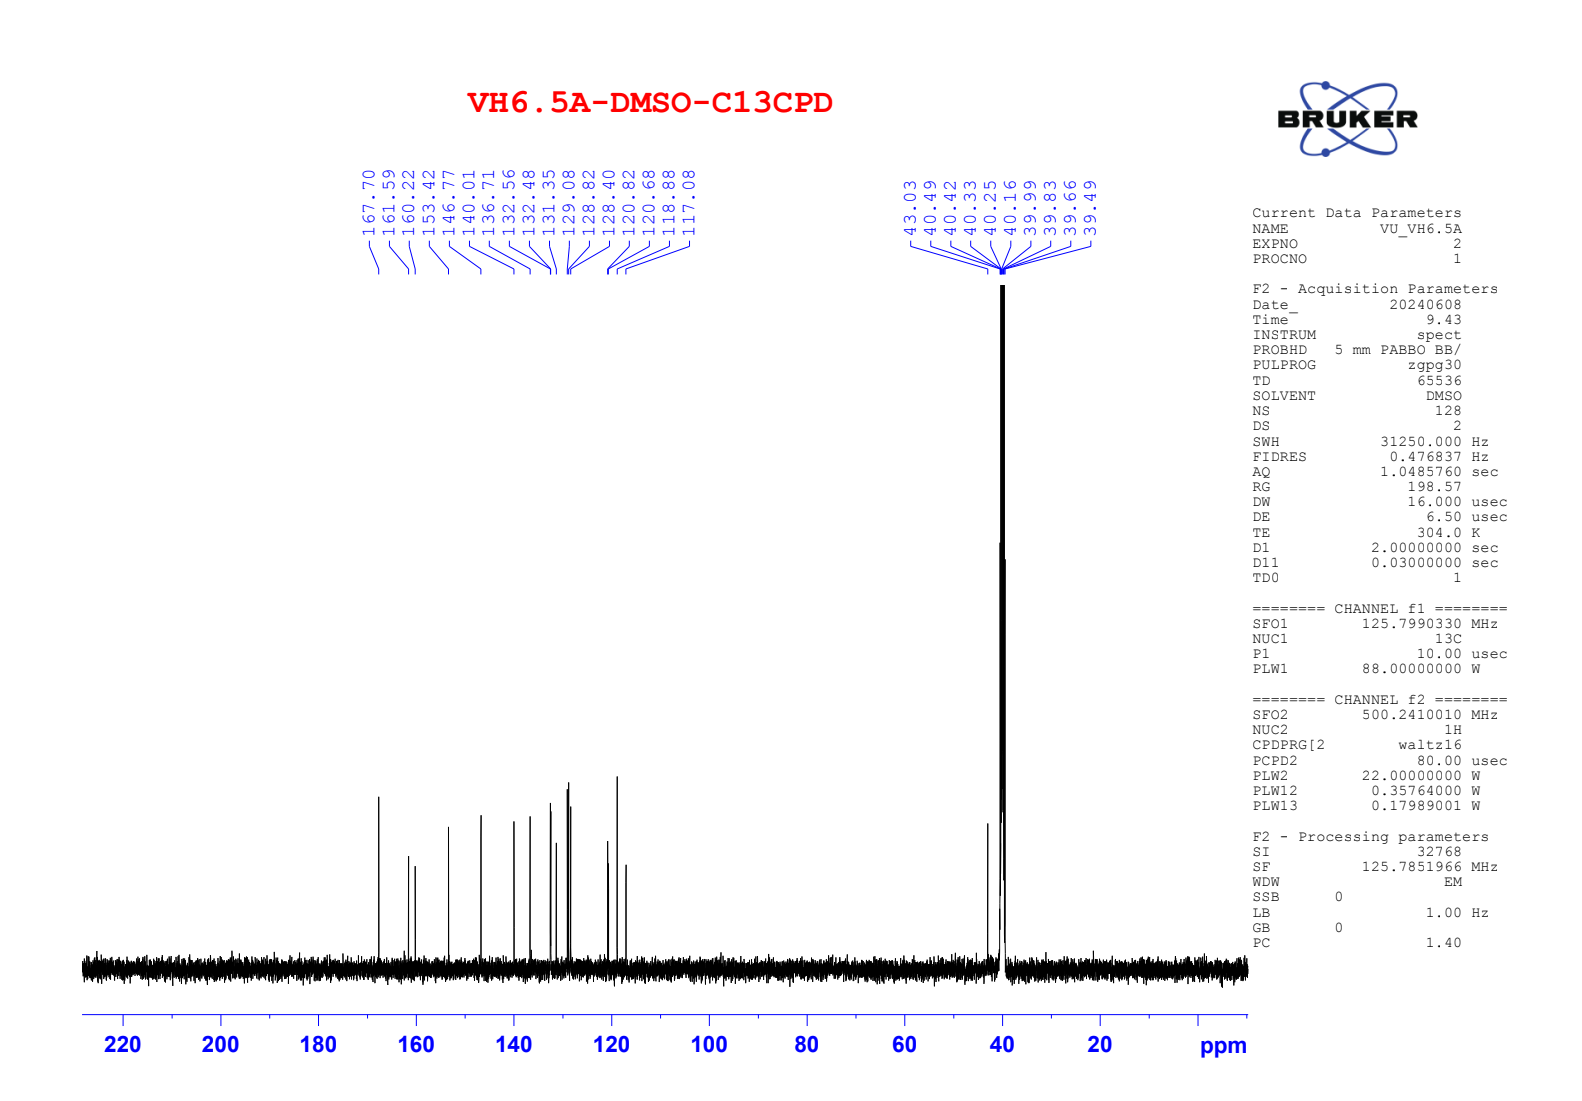
**

**Figure S74. 1H NMR of compound 7g**


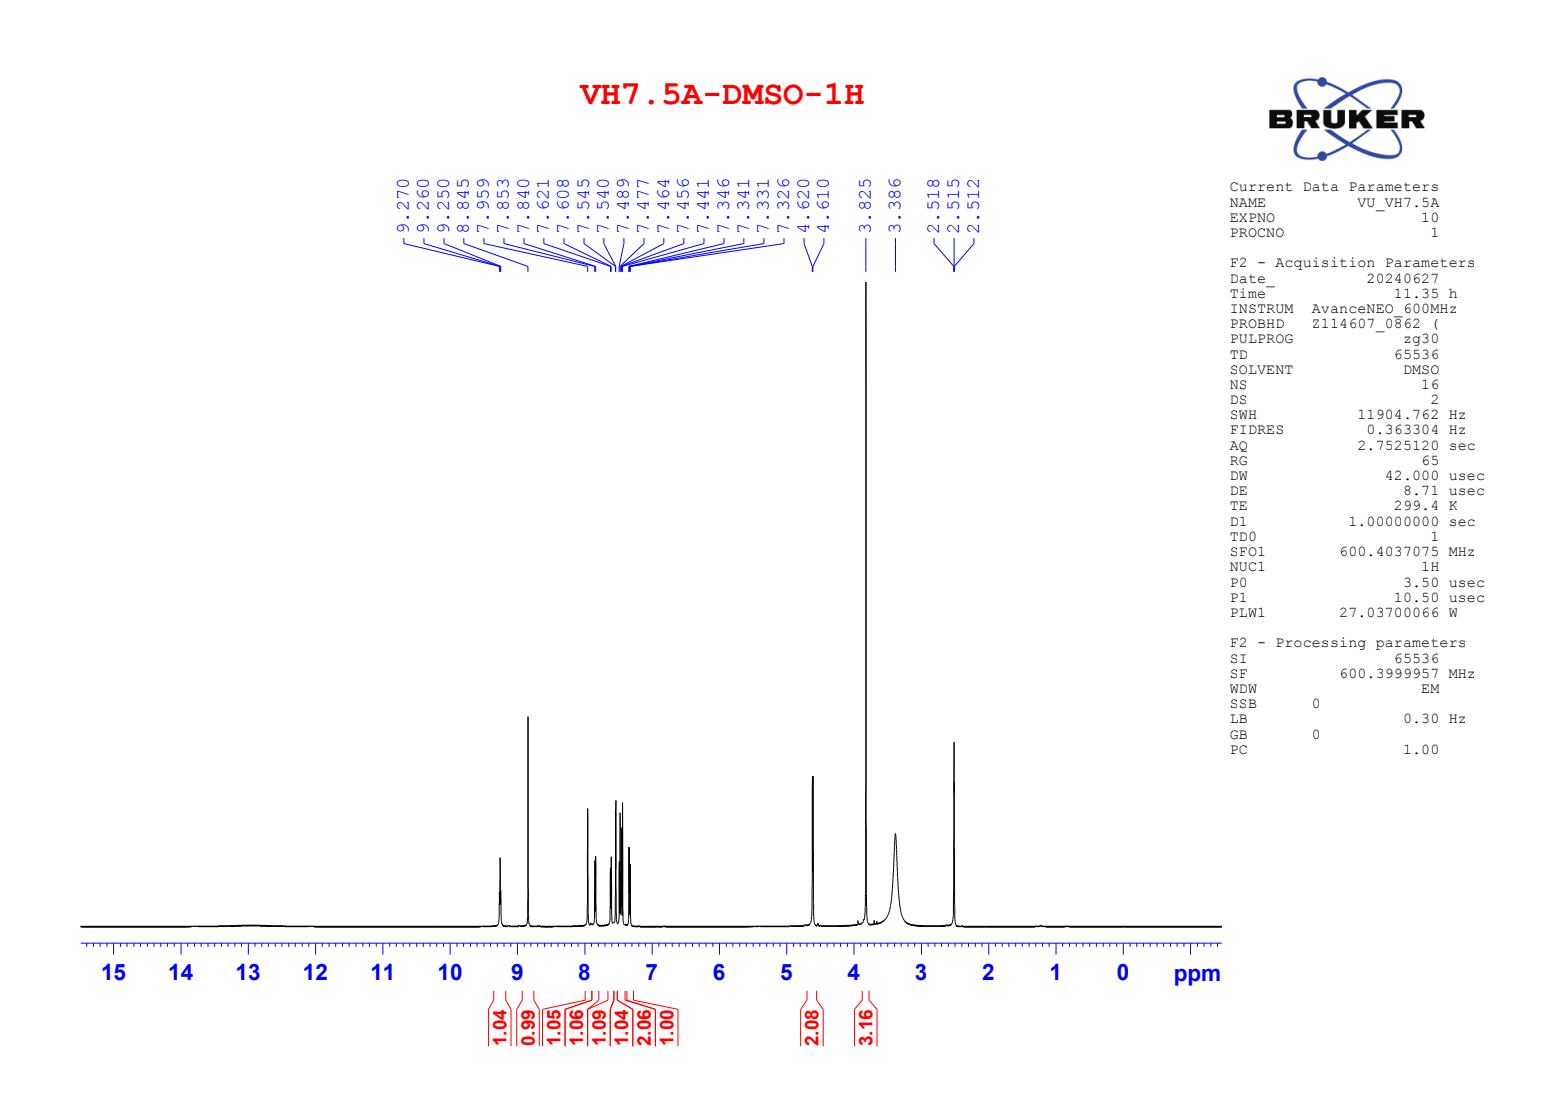


**Figure S75. 13C NMR of compound 7g**

**
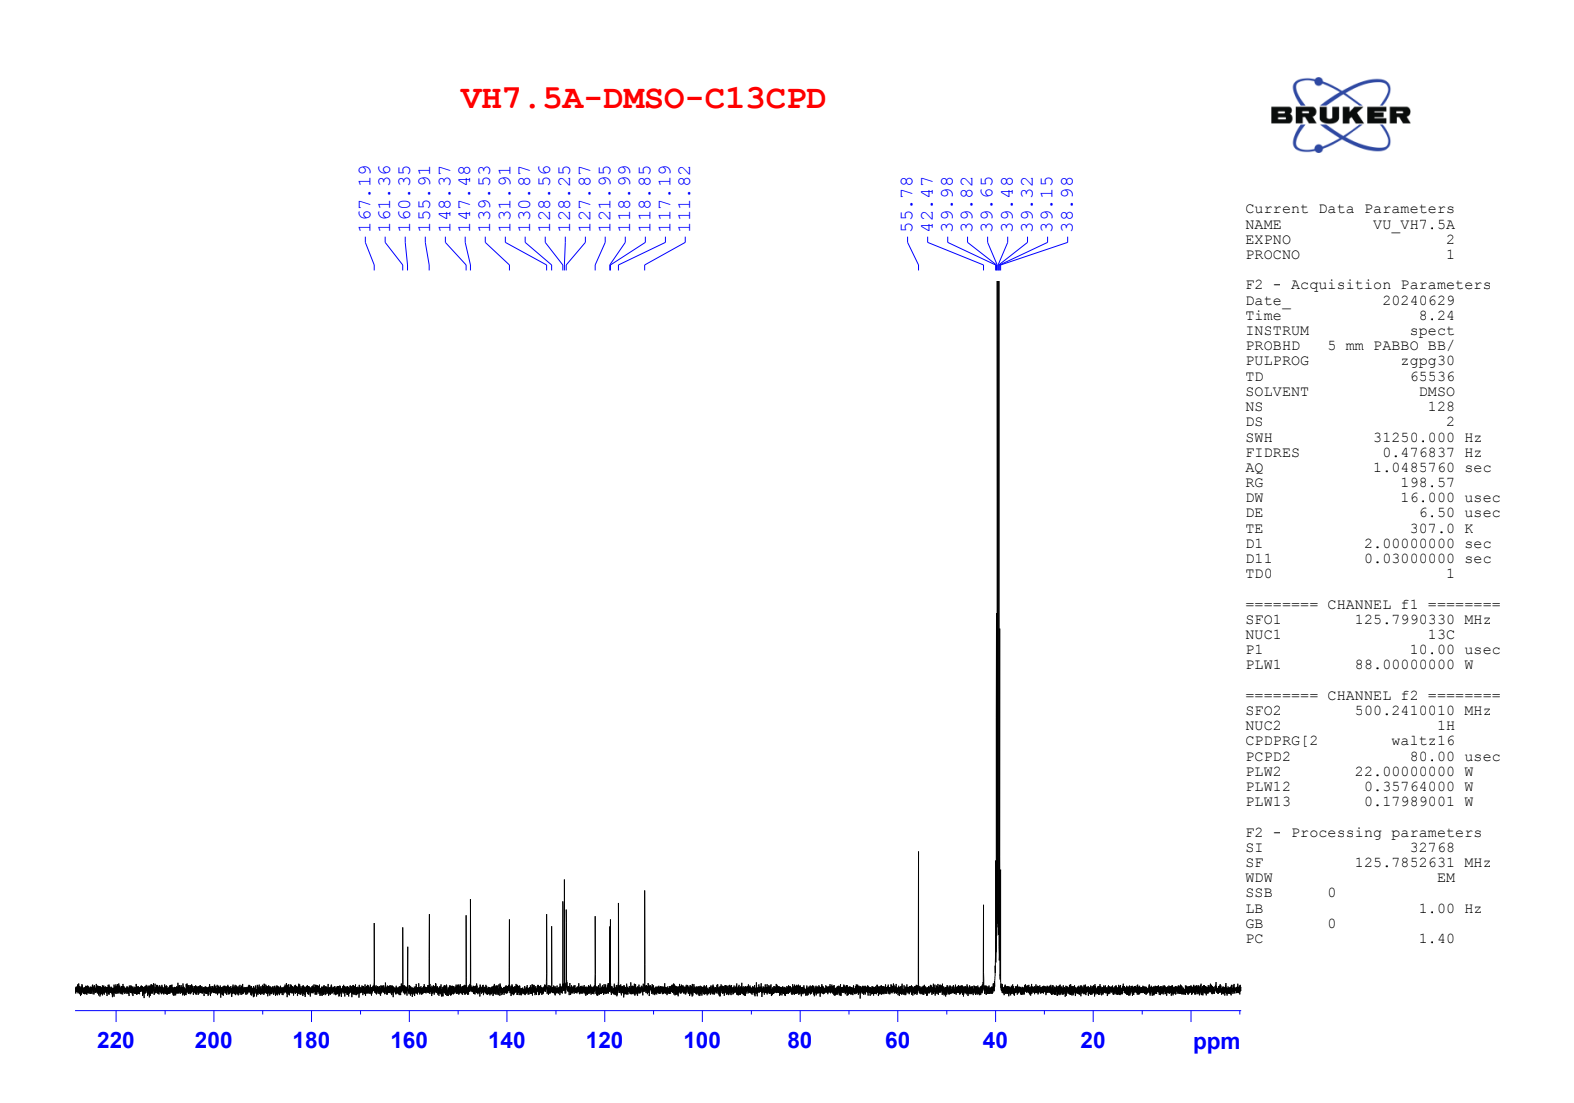
**

**Figure S76. 1H NMR of compound 8a**

**
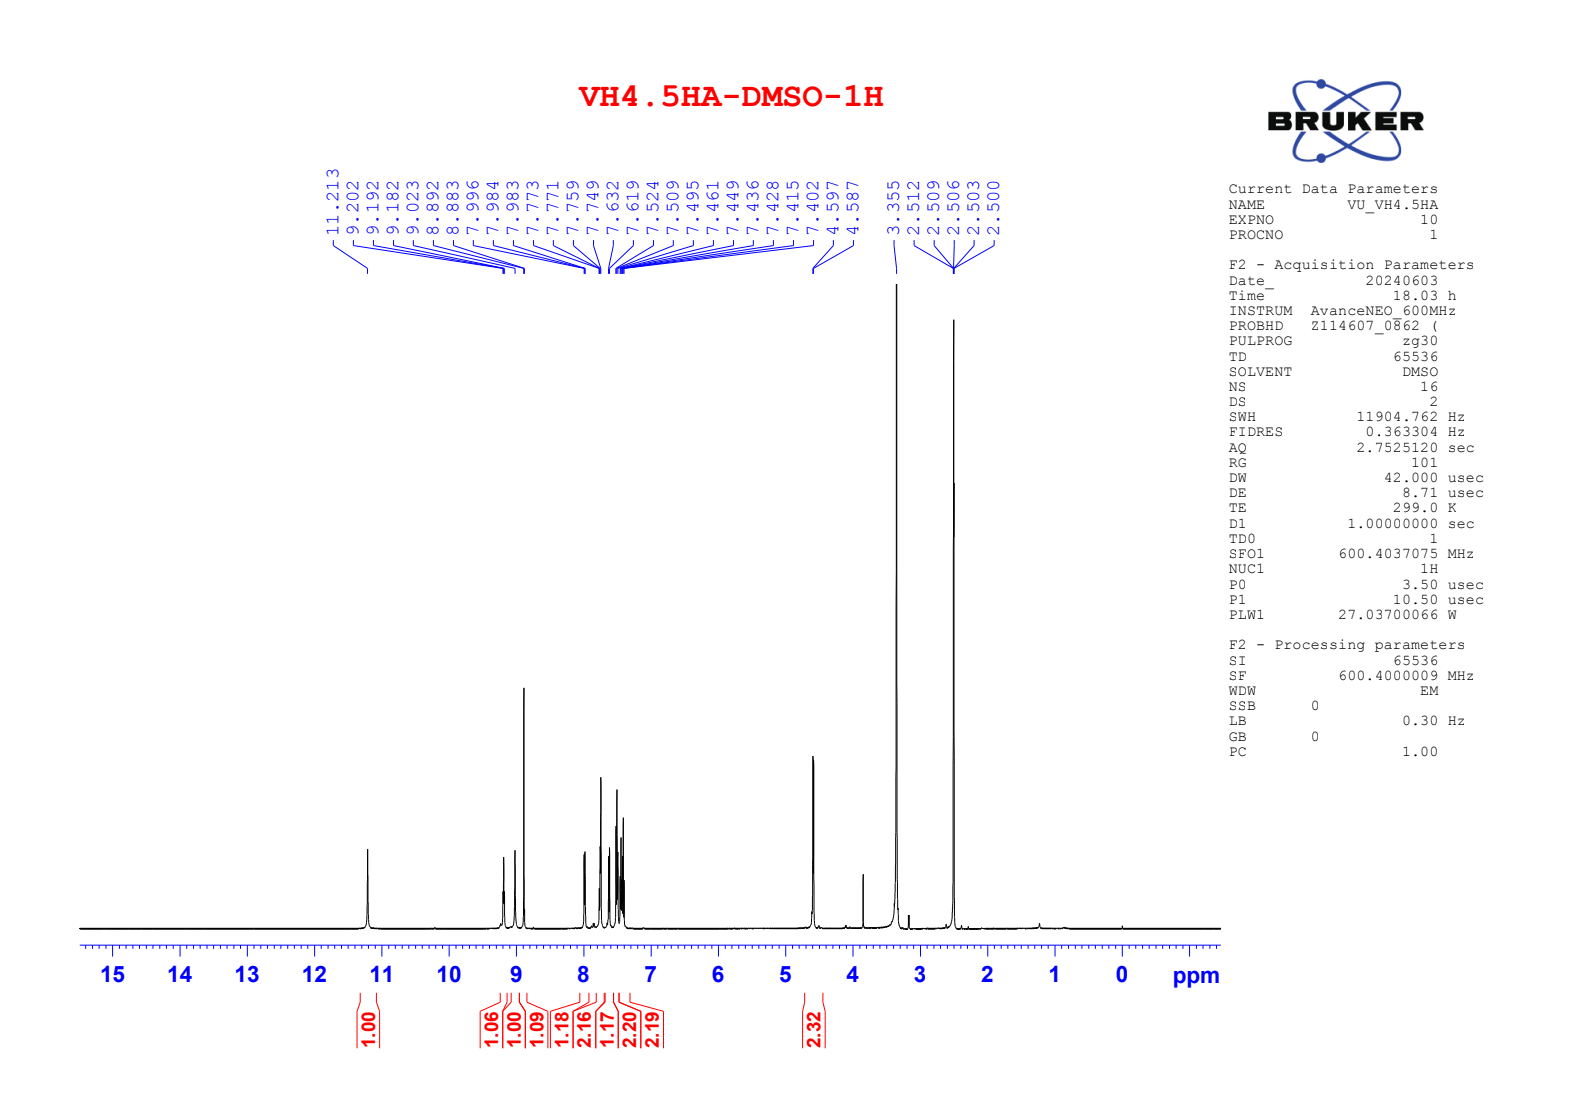
**

**Figure S77. 13C NMR of compound 8a**


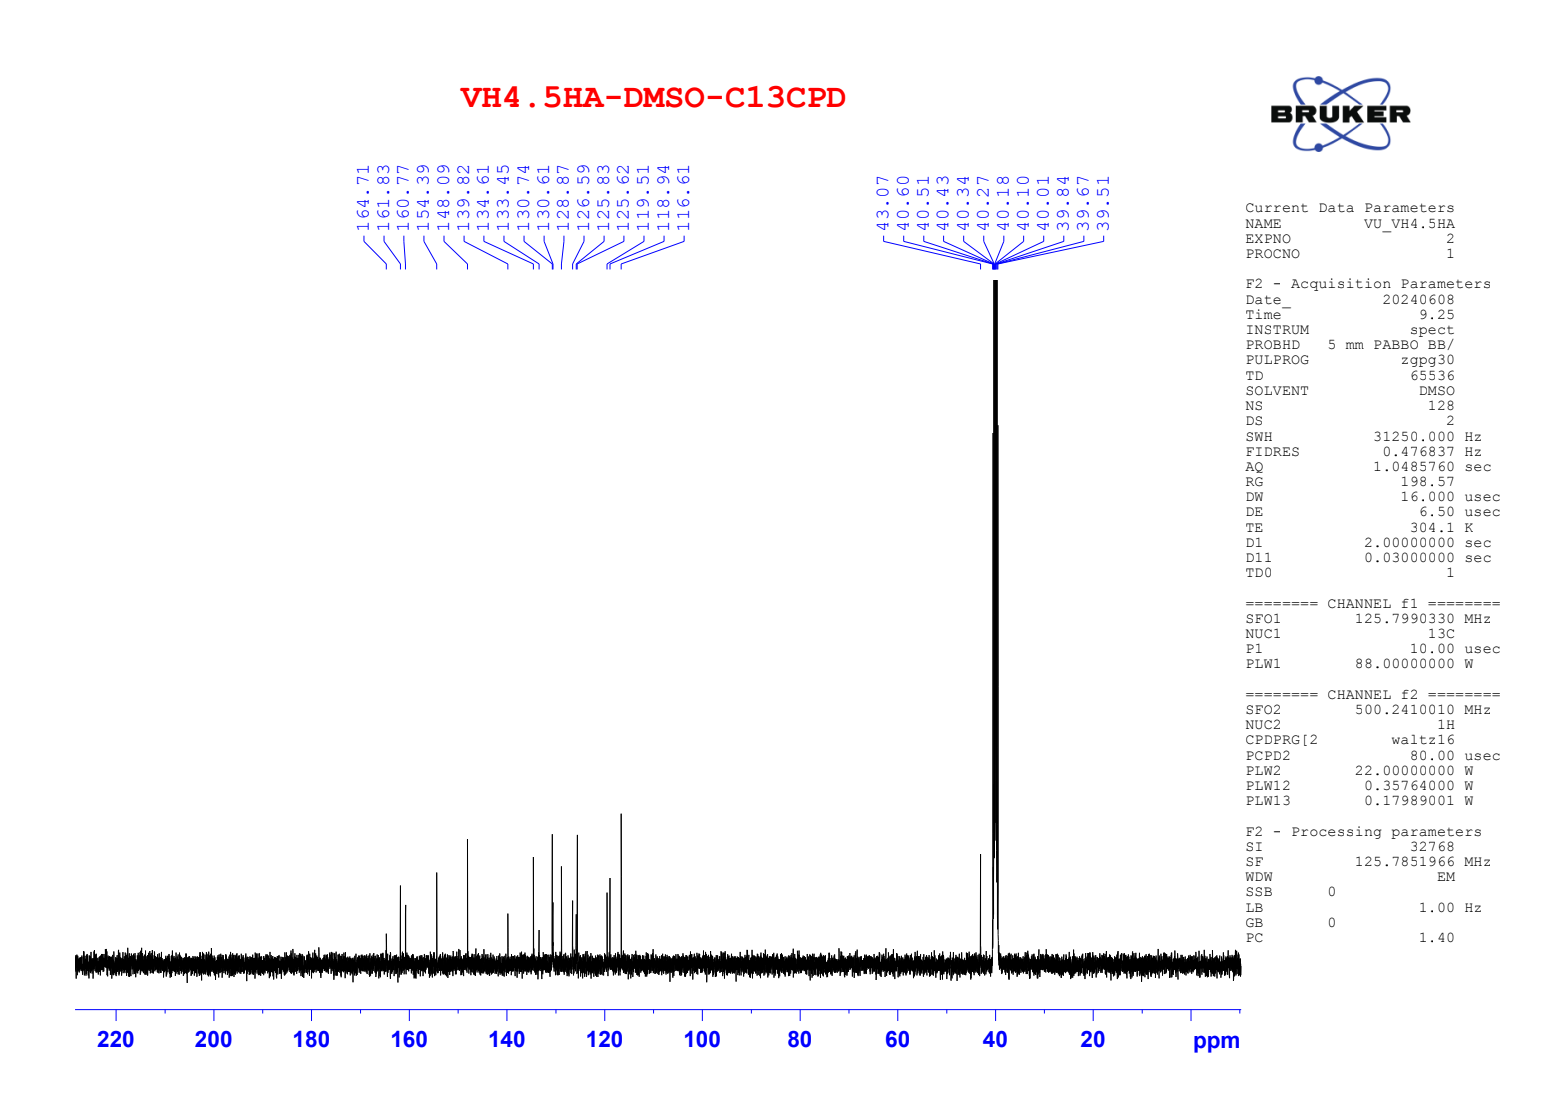


**Figure S78. HRMS of compound 8a**

**
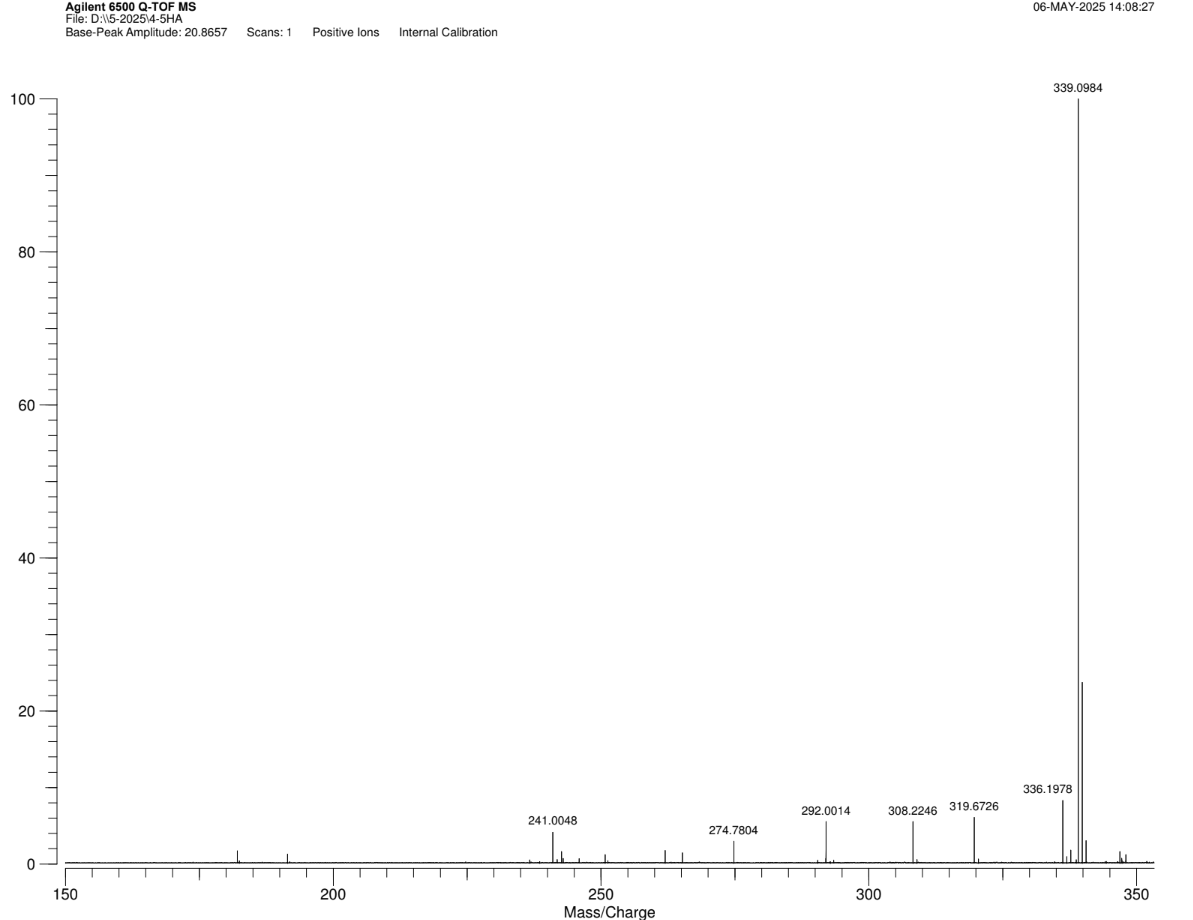
**

**Figure S79. 1H NMR of compound 8b**


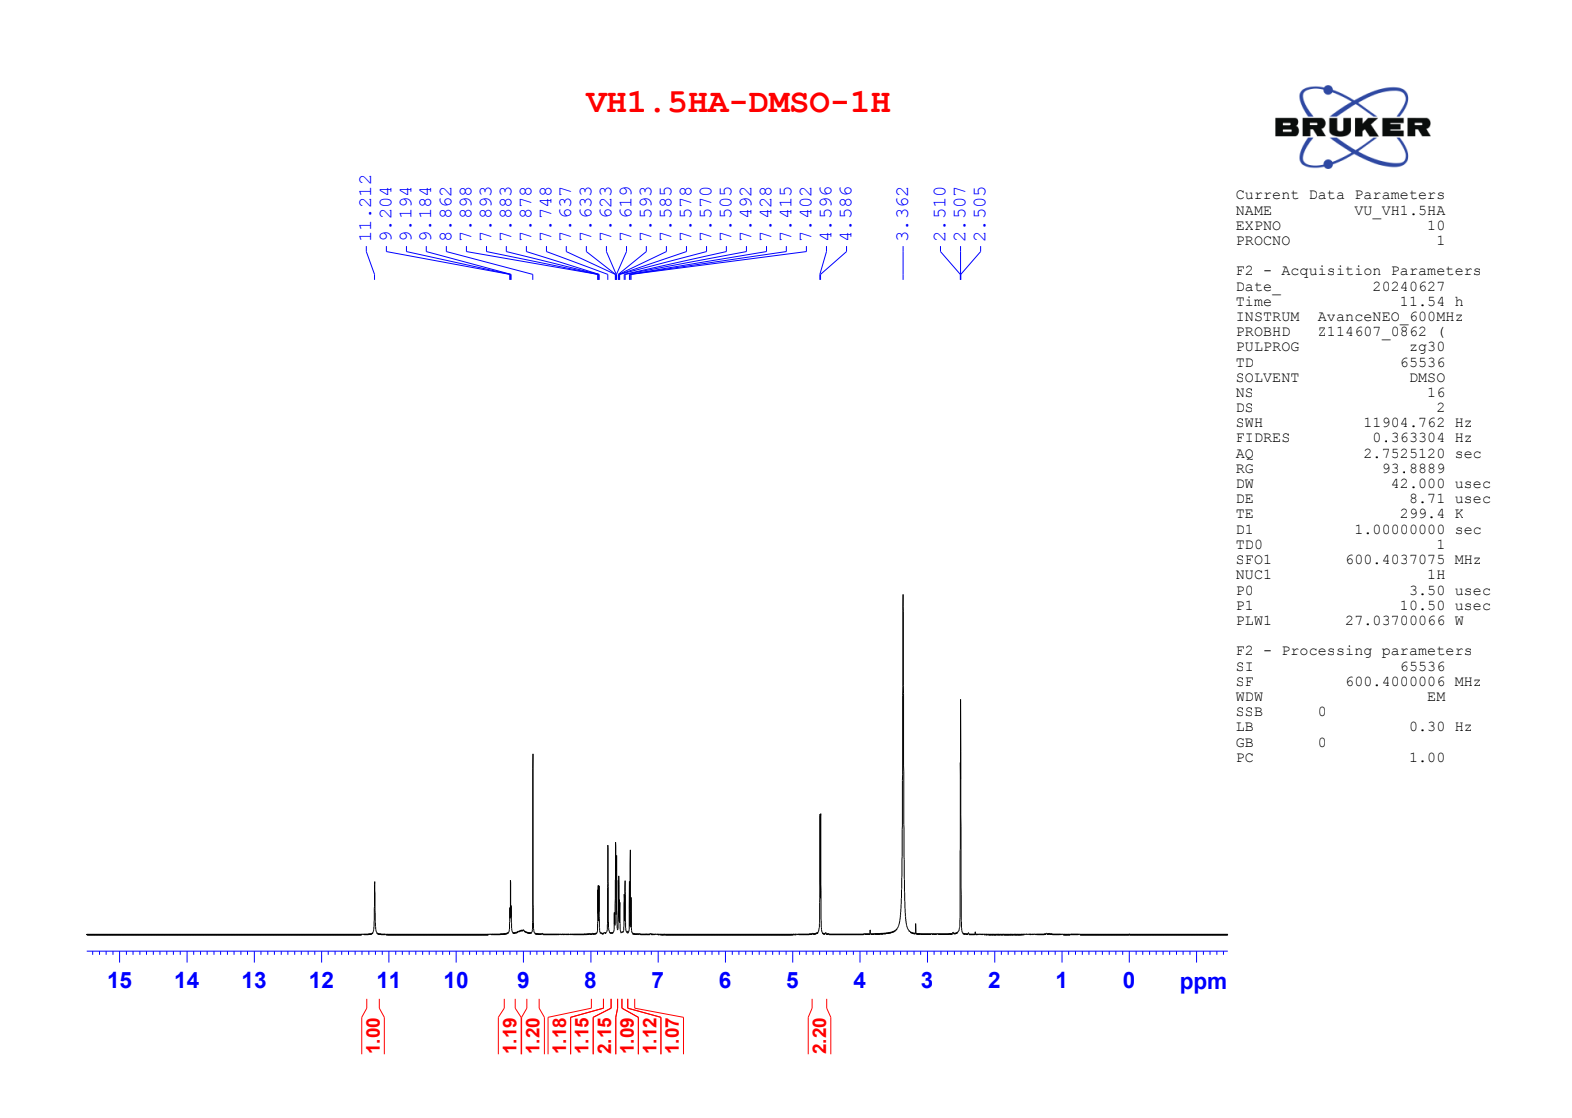


**Figure S80. 13C NMR of compound 8b**

**
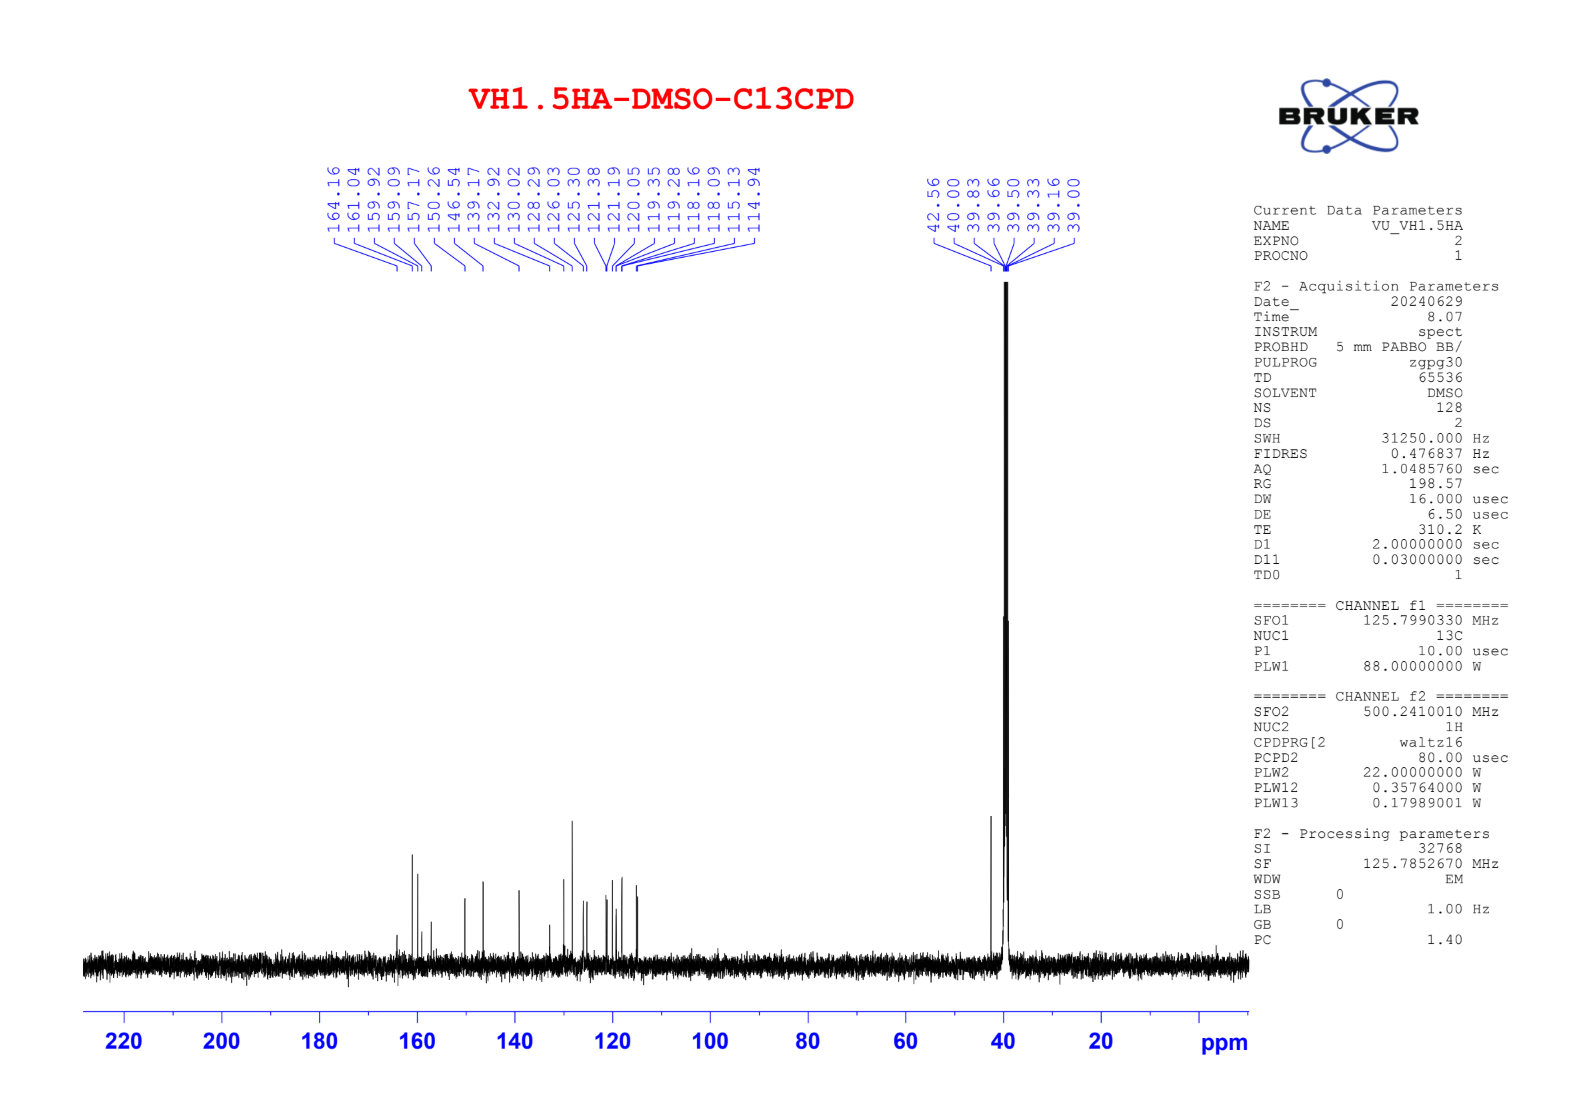
**

**Figure S81. HRMS of compound 8b**


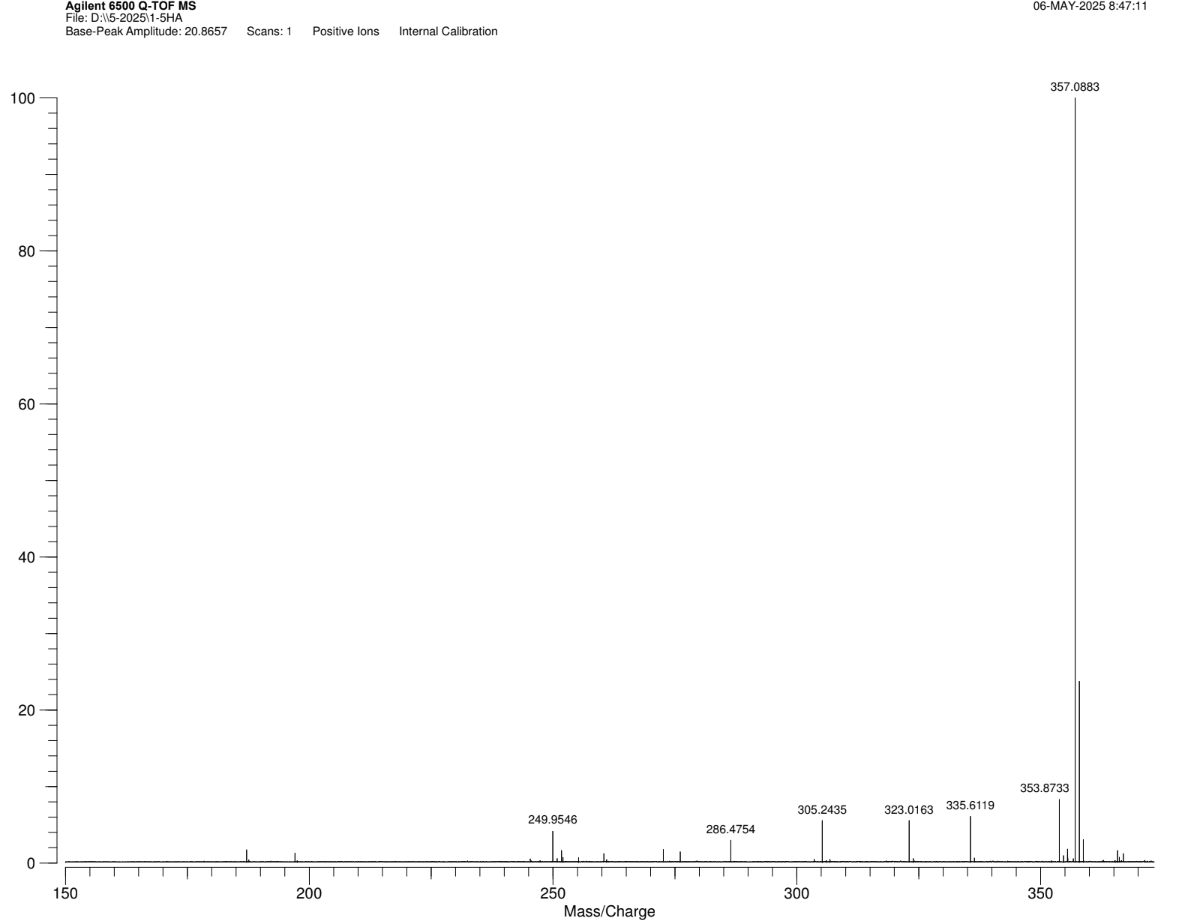


**Figure S82. 1H NMR of compound 8c**

**
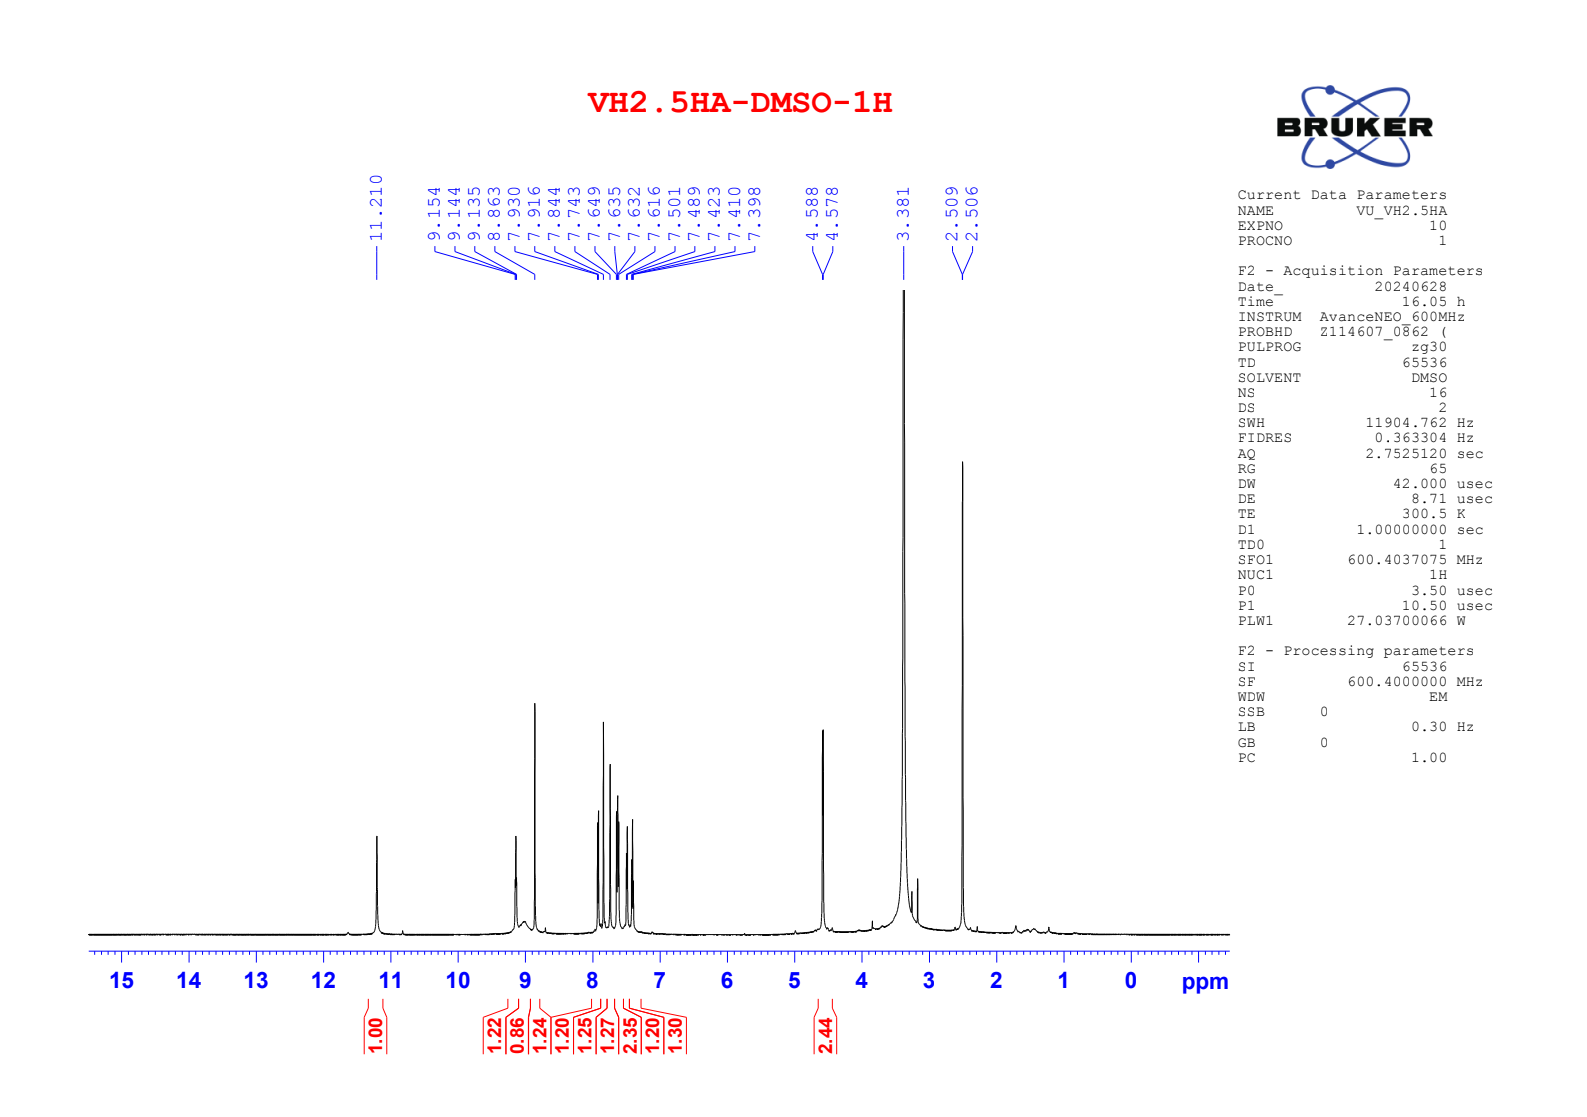
**

**Figure S83. 13C NMR of compound 8c**


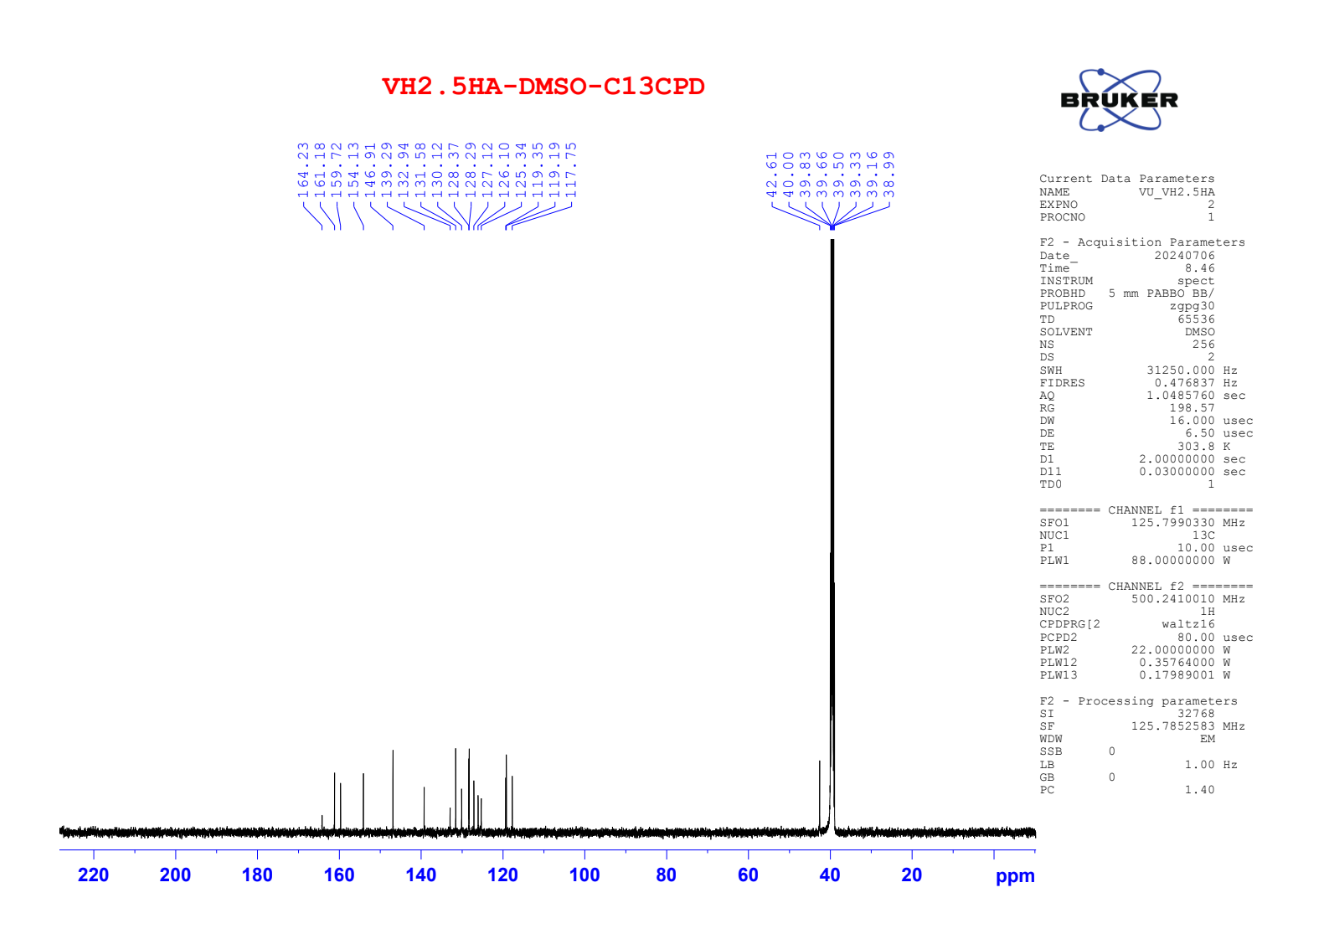


**Figure S84. 1H NMR of compound 8d**

**
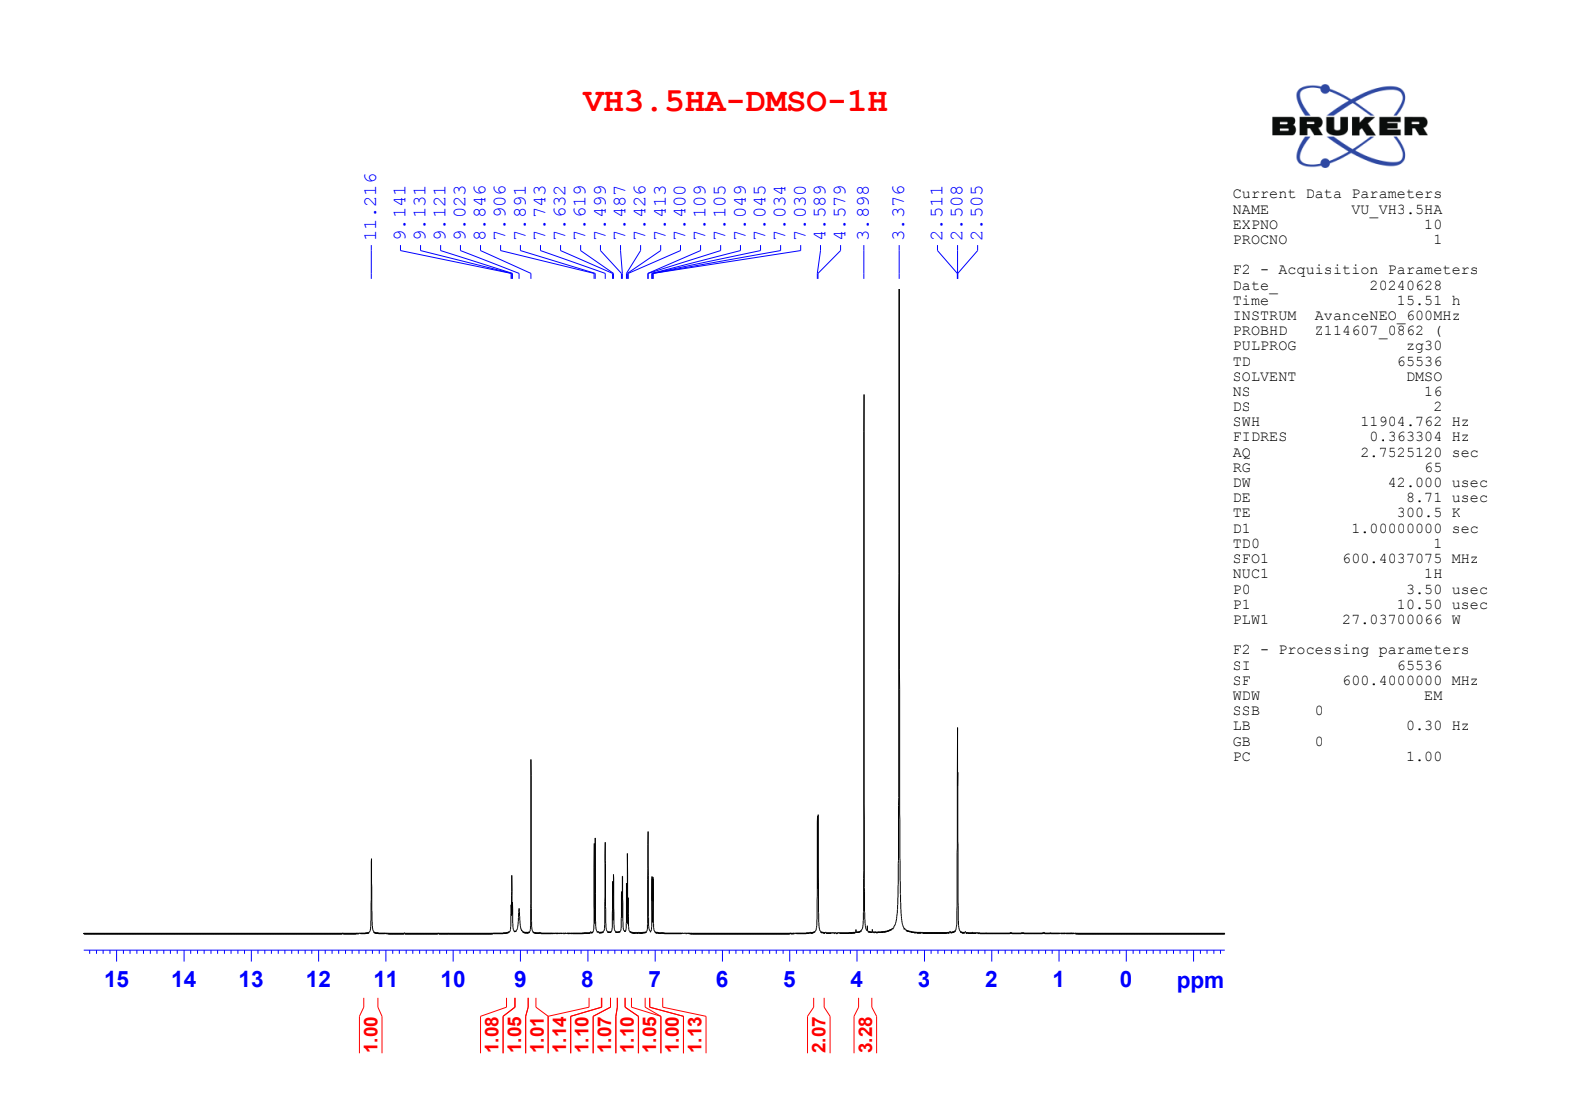
**

**Figure S85. 13C NMR of compound 8d**

**
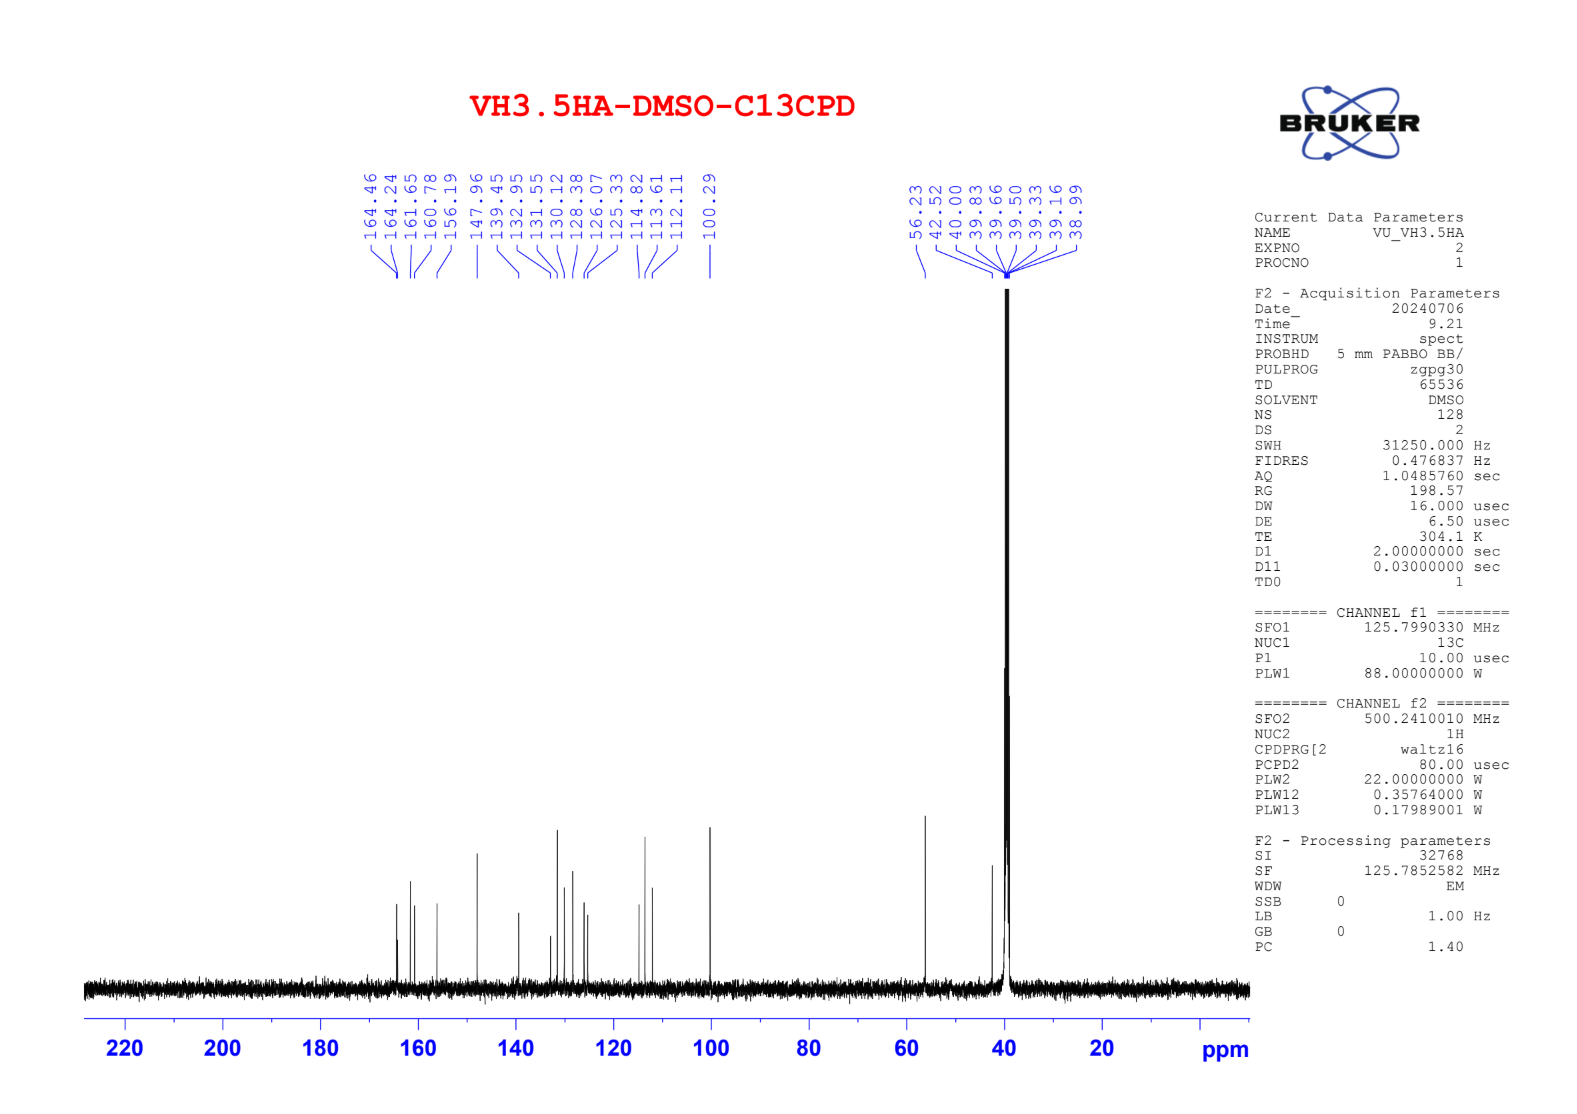
**

**Figure S86. 1H NMR of compound 8e**

**
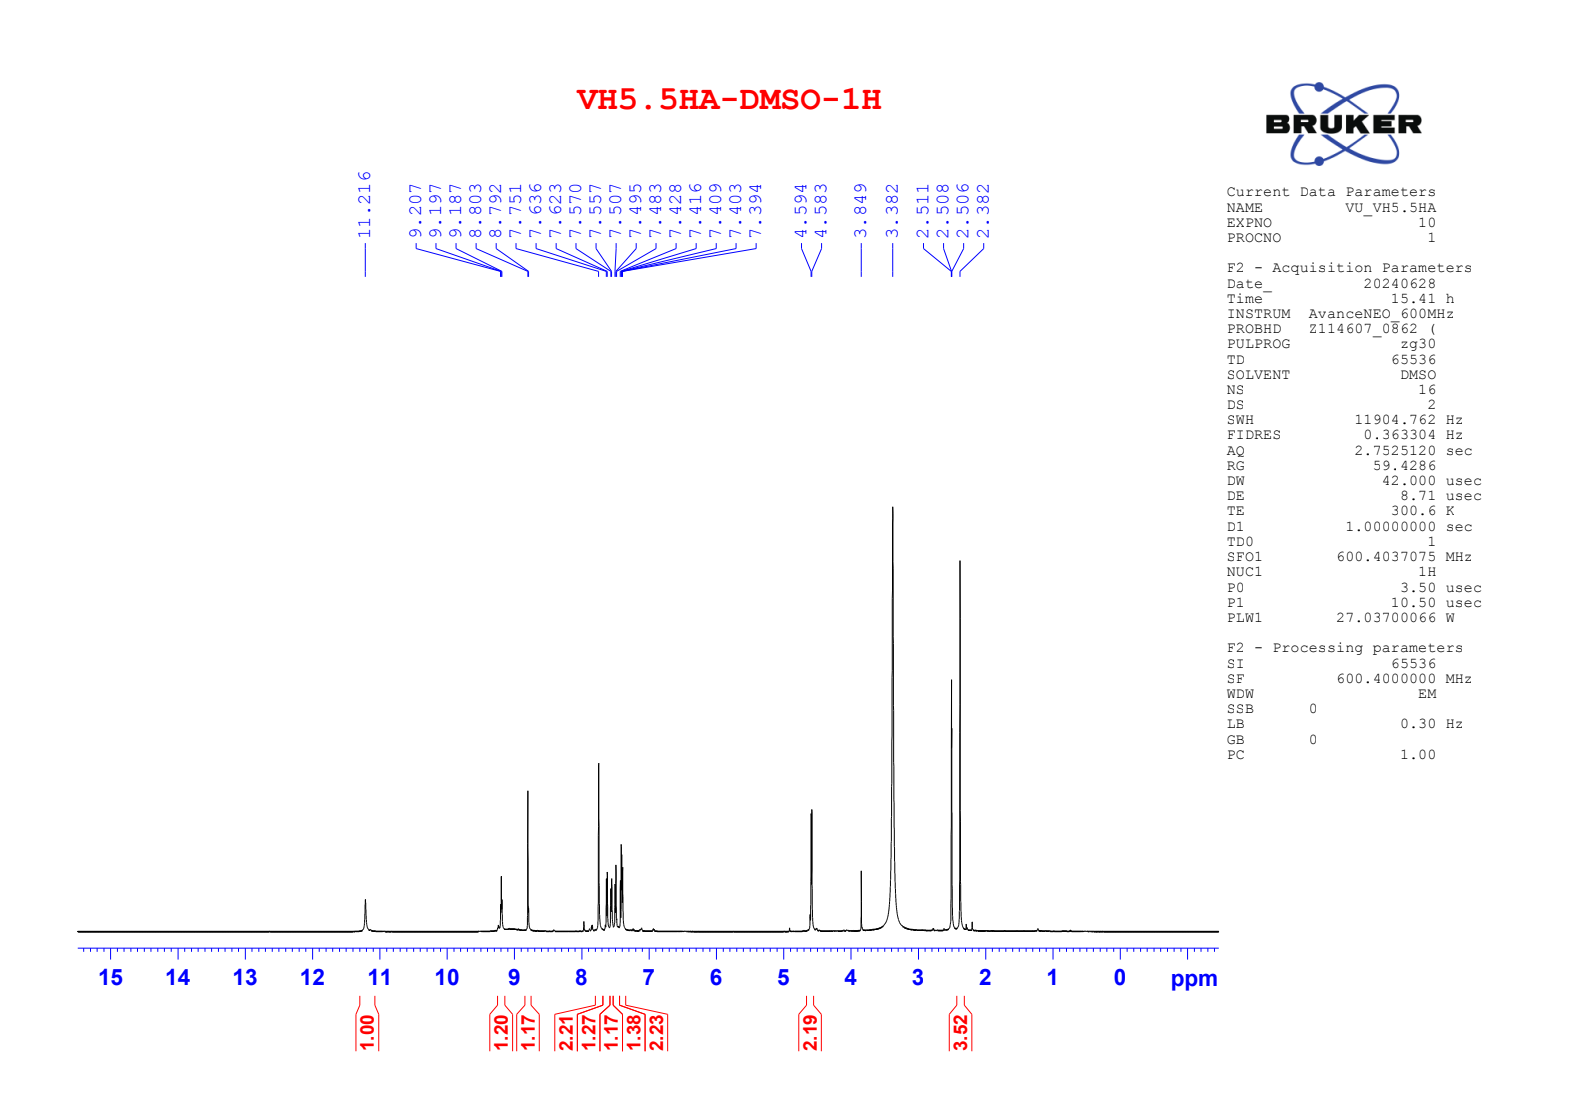
**

**Figure S87. 13C NMR of compound 8e**

**
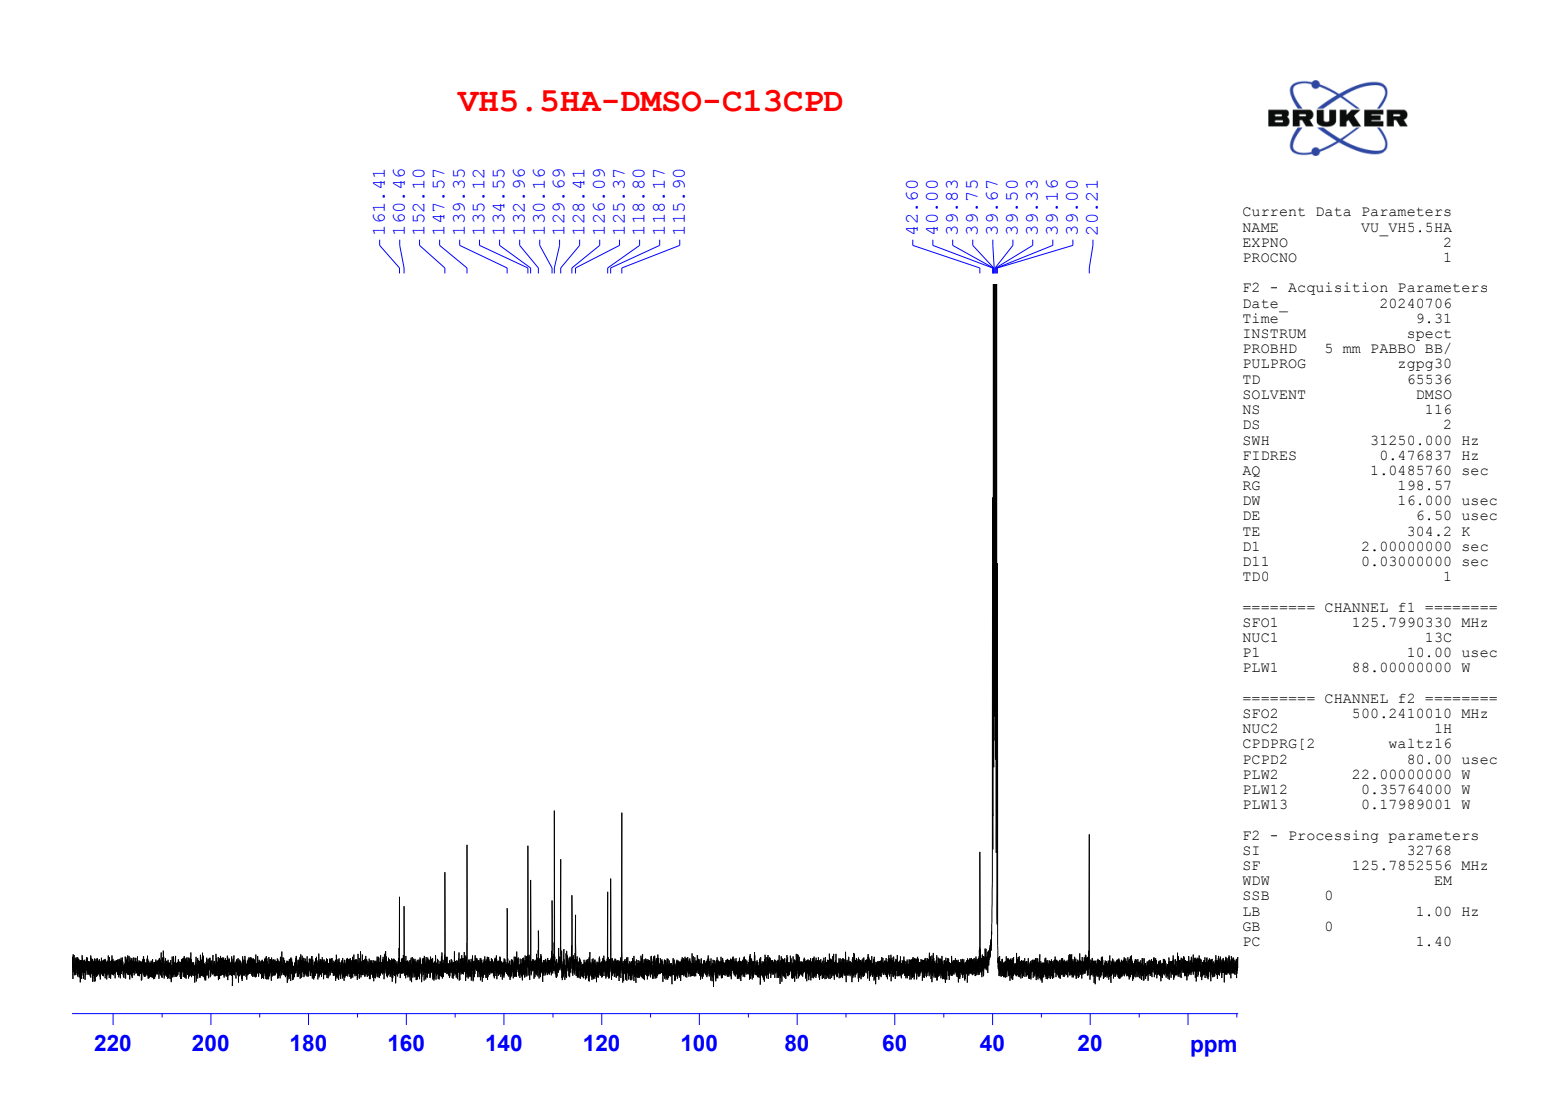
**

**Figure S88. HRMS of compound 8e**

**
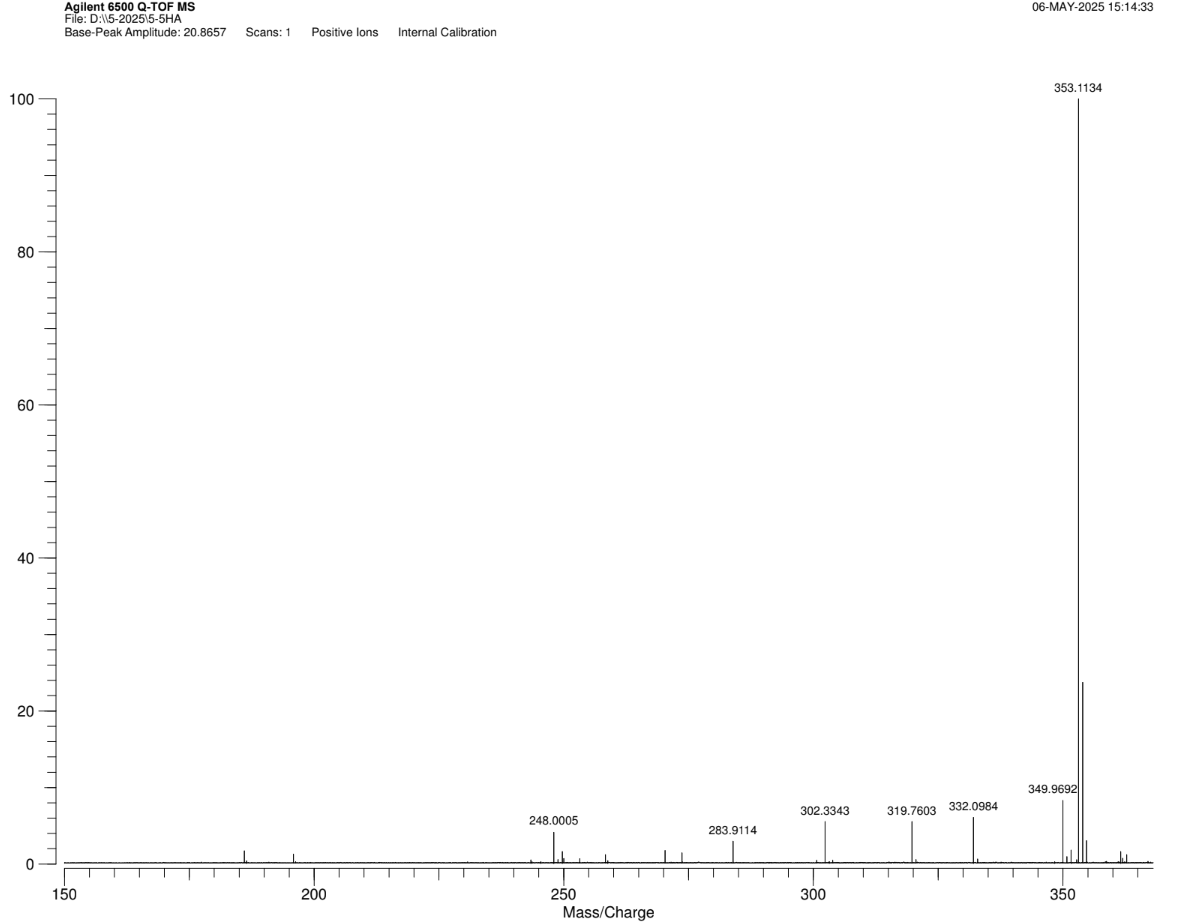
**

**Figure S89. 1H NMR of compound 8f**


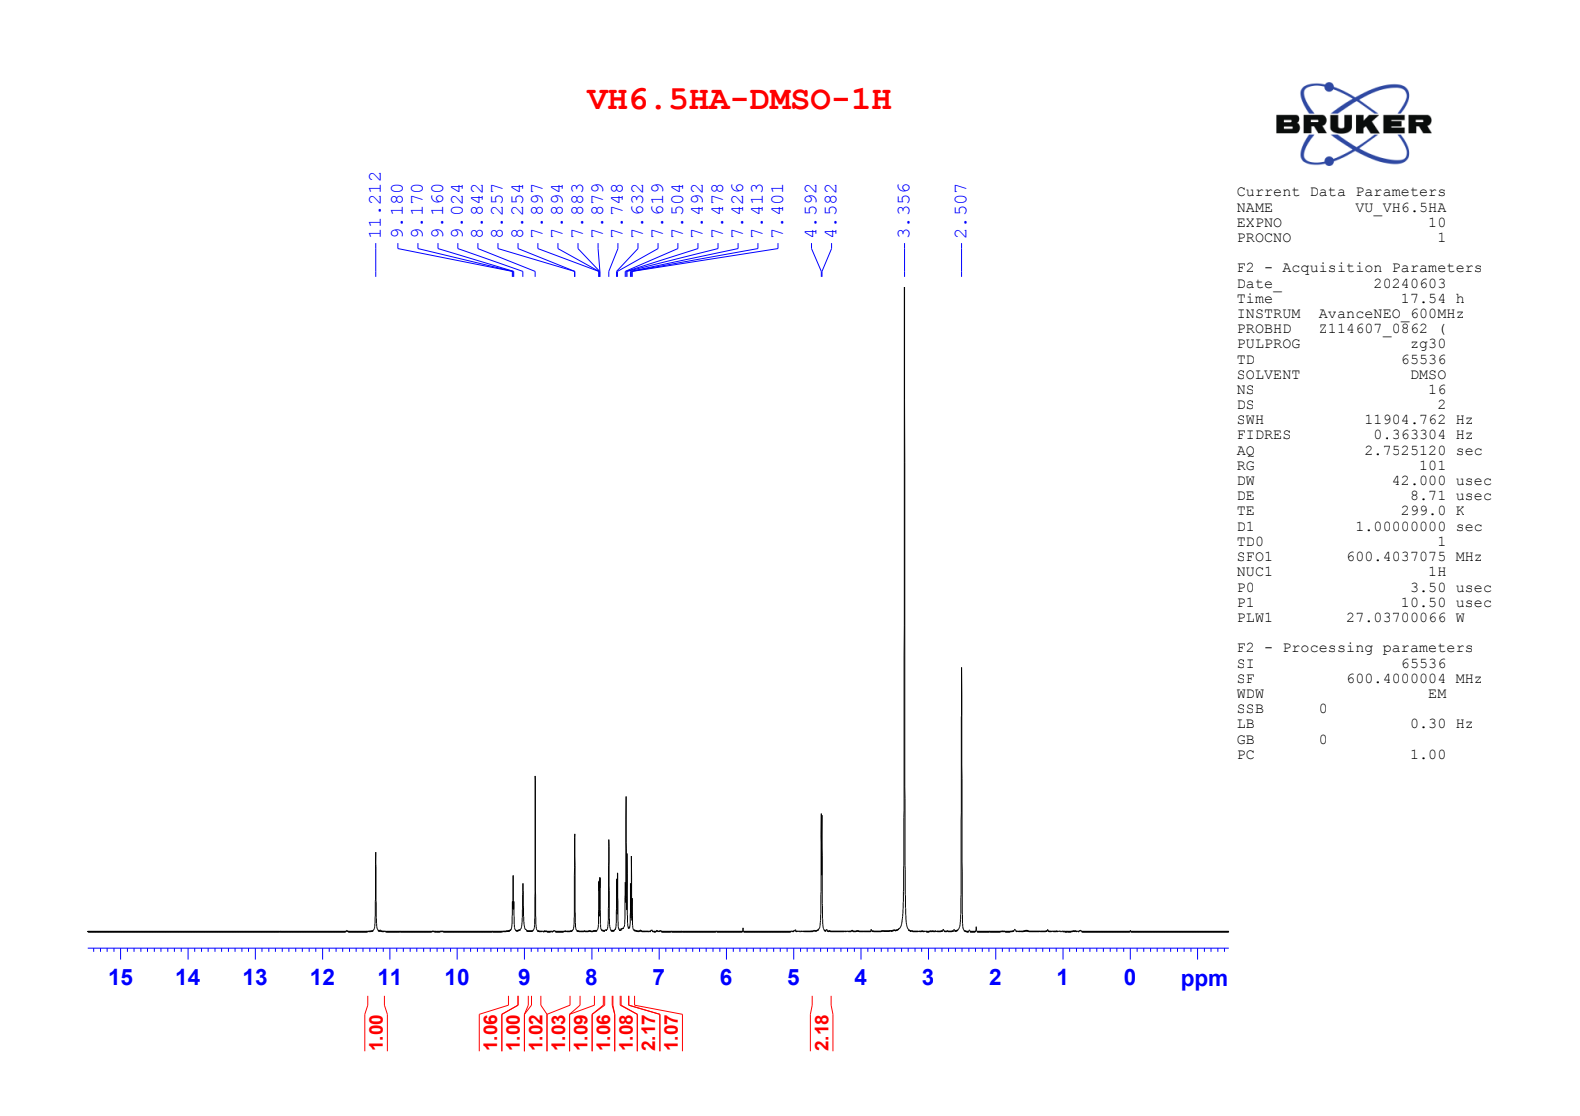


**Figure S90. 13C NMR of compound 8f**

**
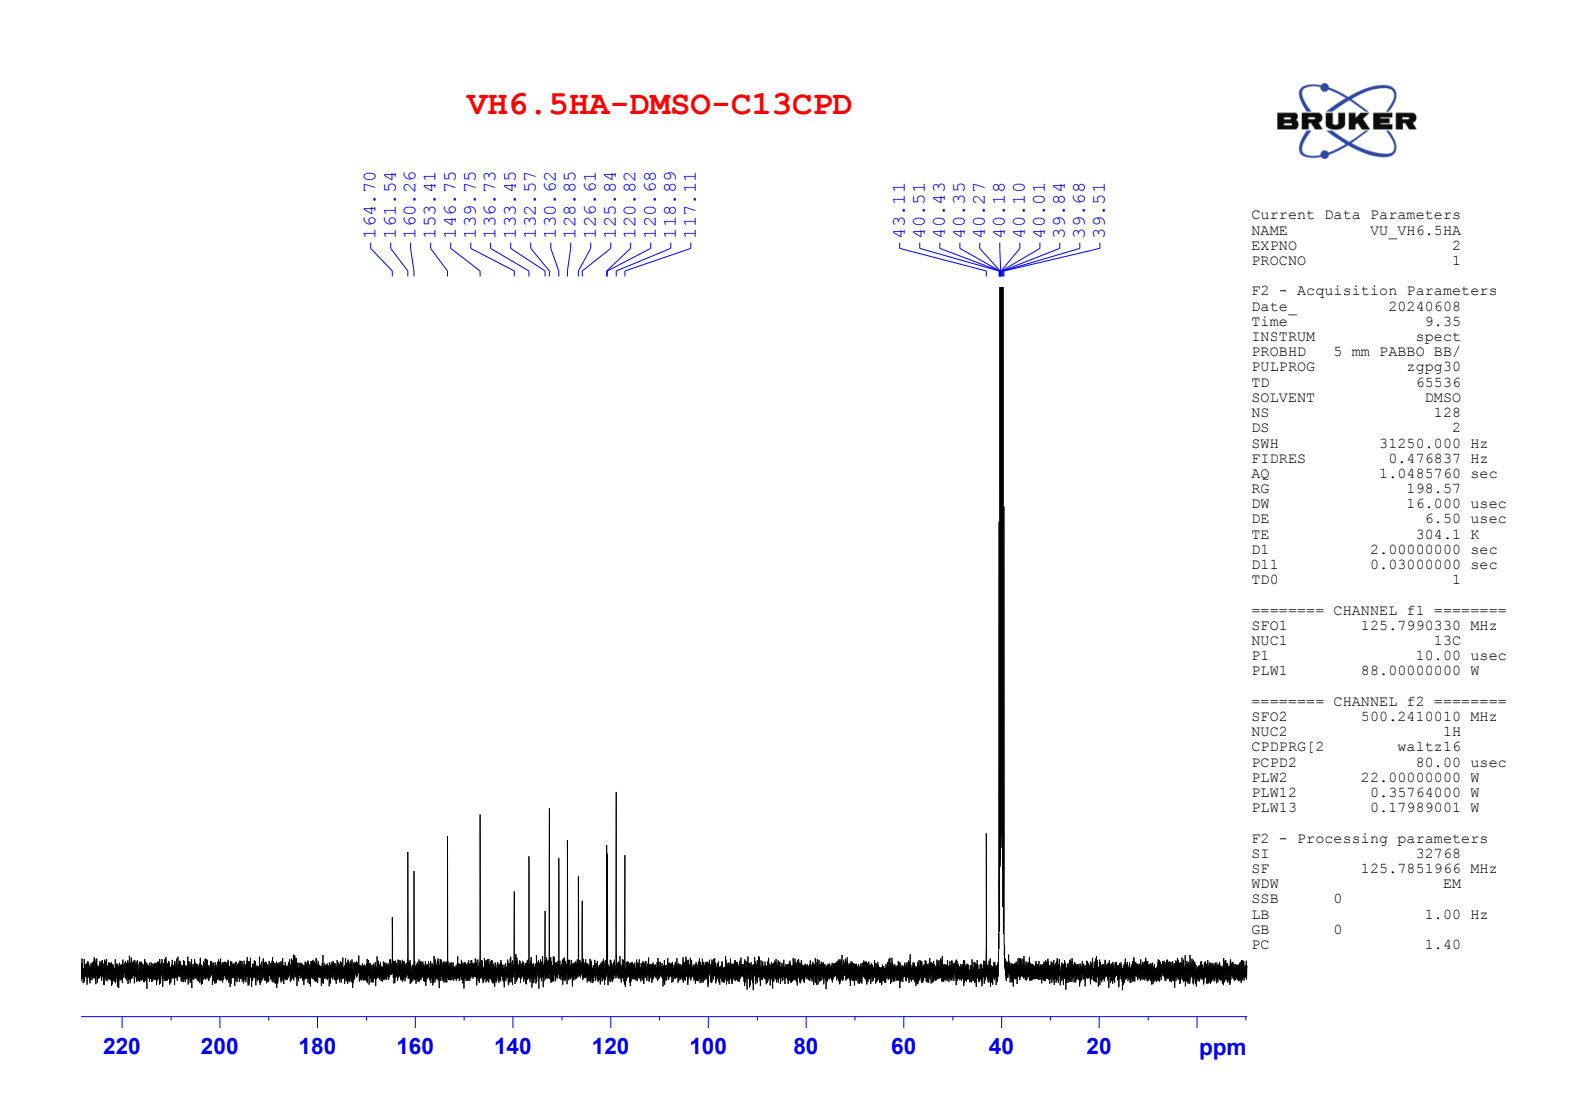
**

**Figure S91. HRMS of compound 8f**

**
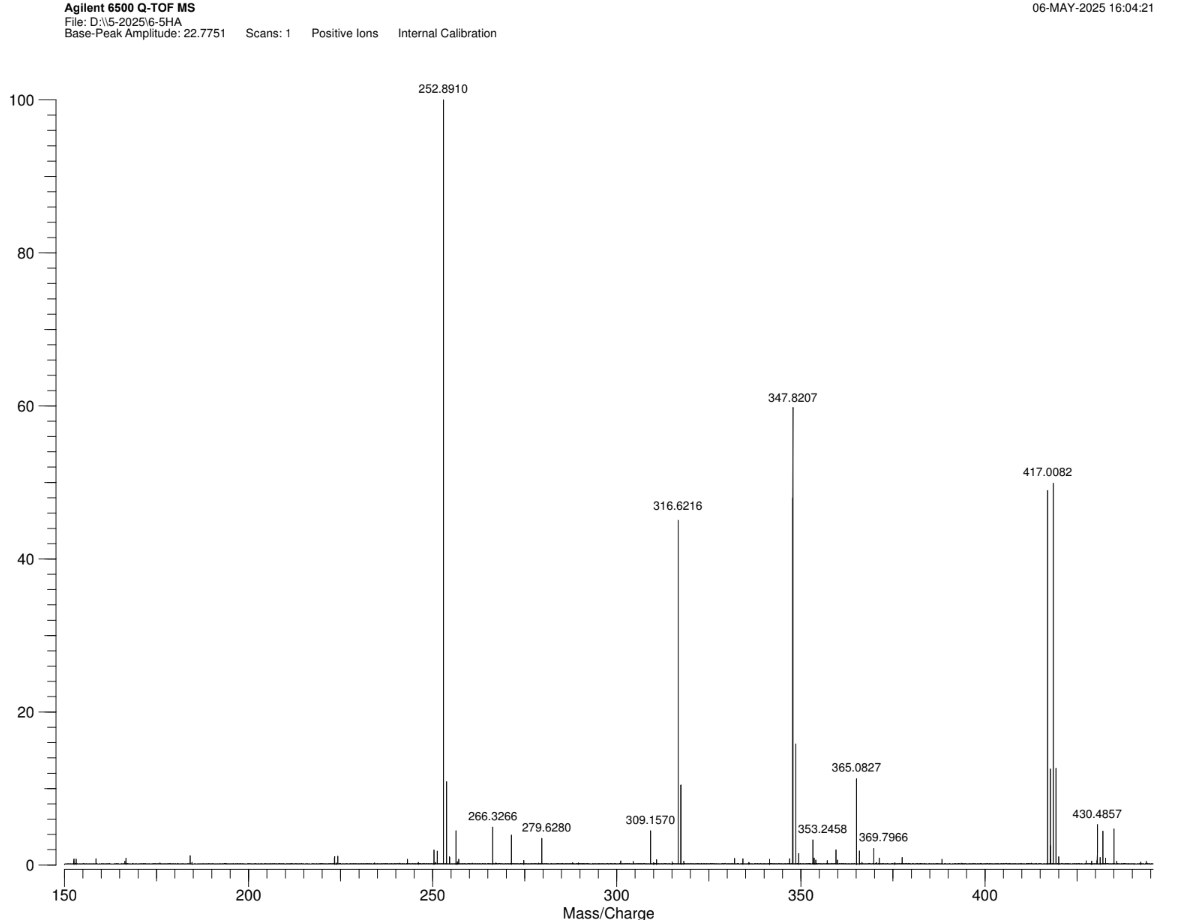
**

**Figure S92. 1H NMR of compound 8g**

**
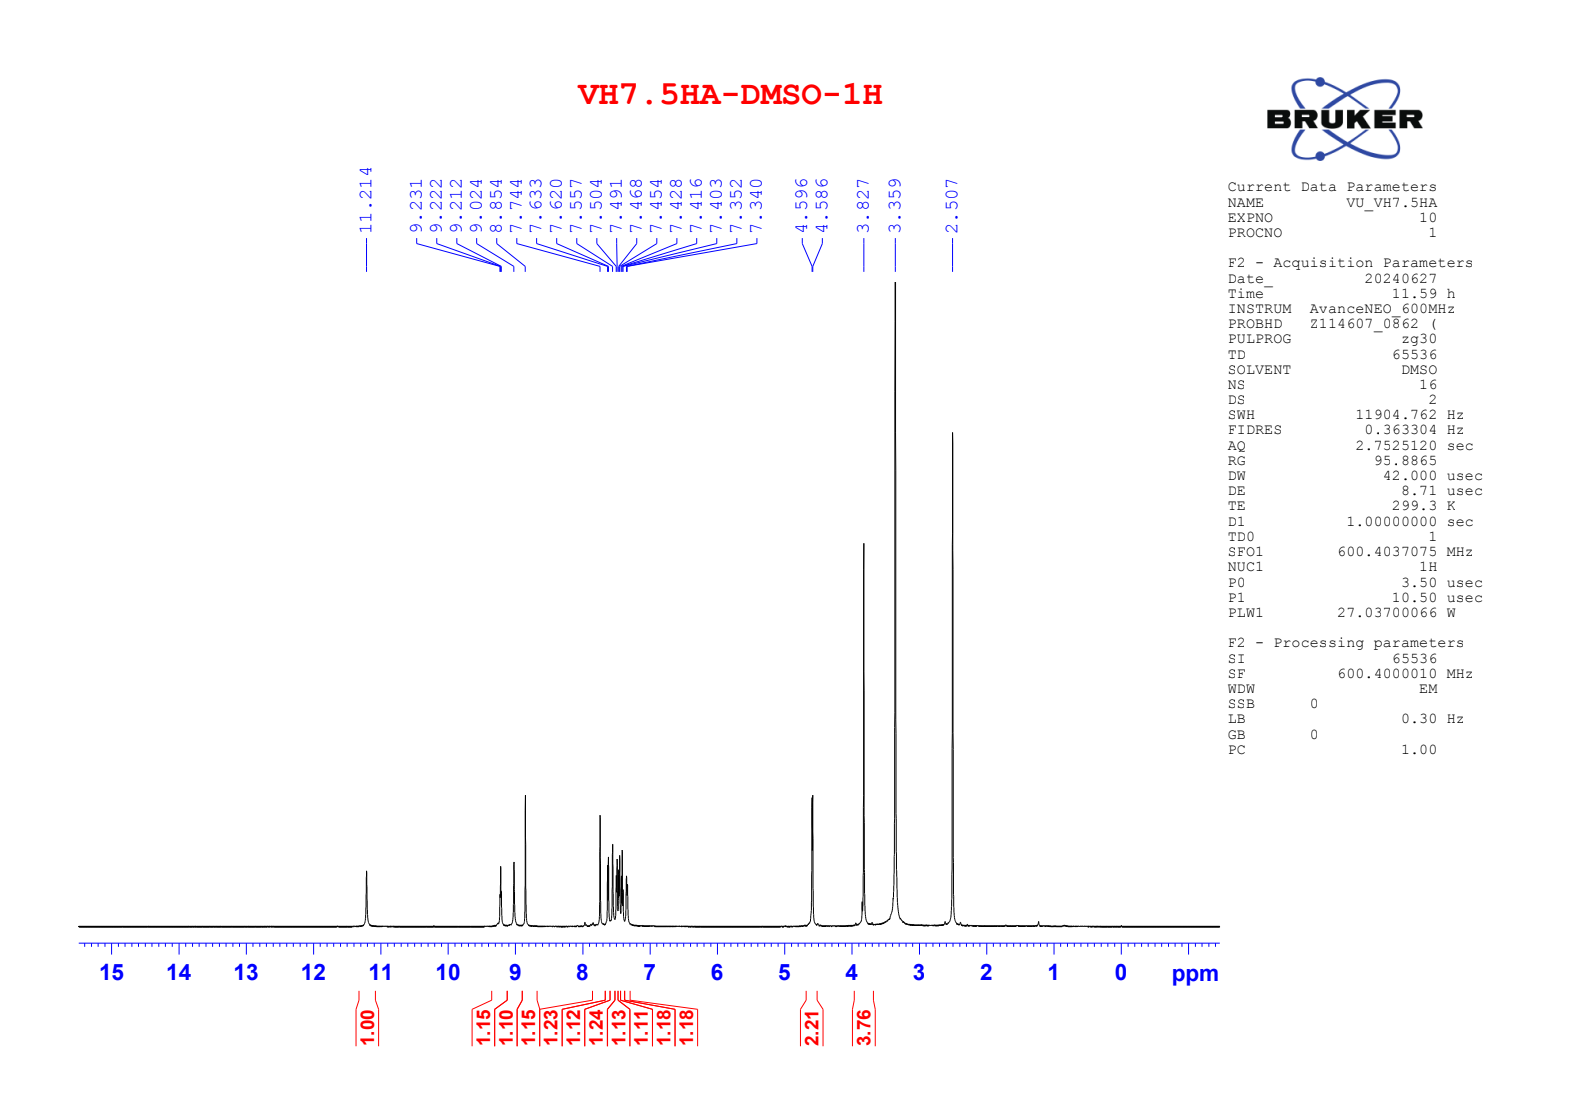
**

**Figure S94. 13C NMR of compound 8g**


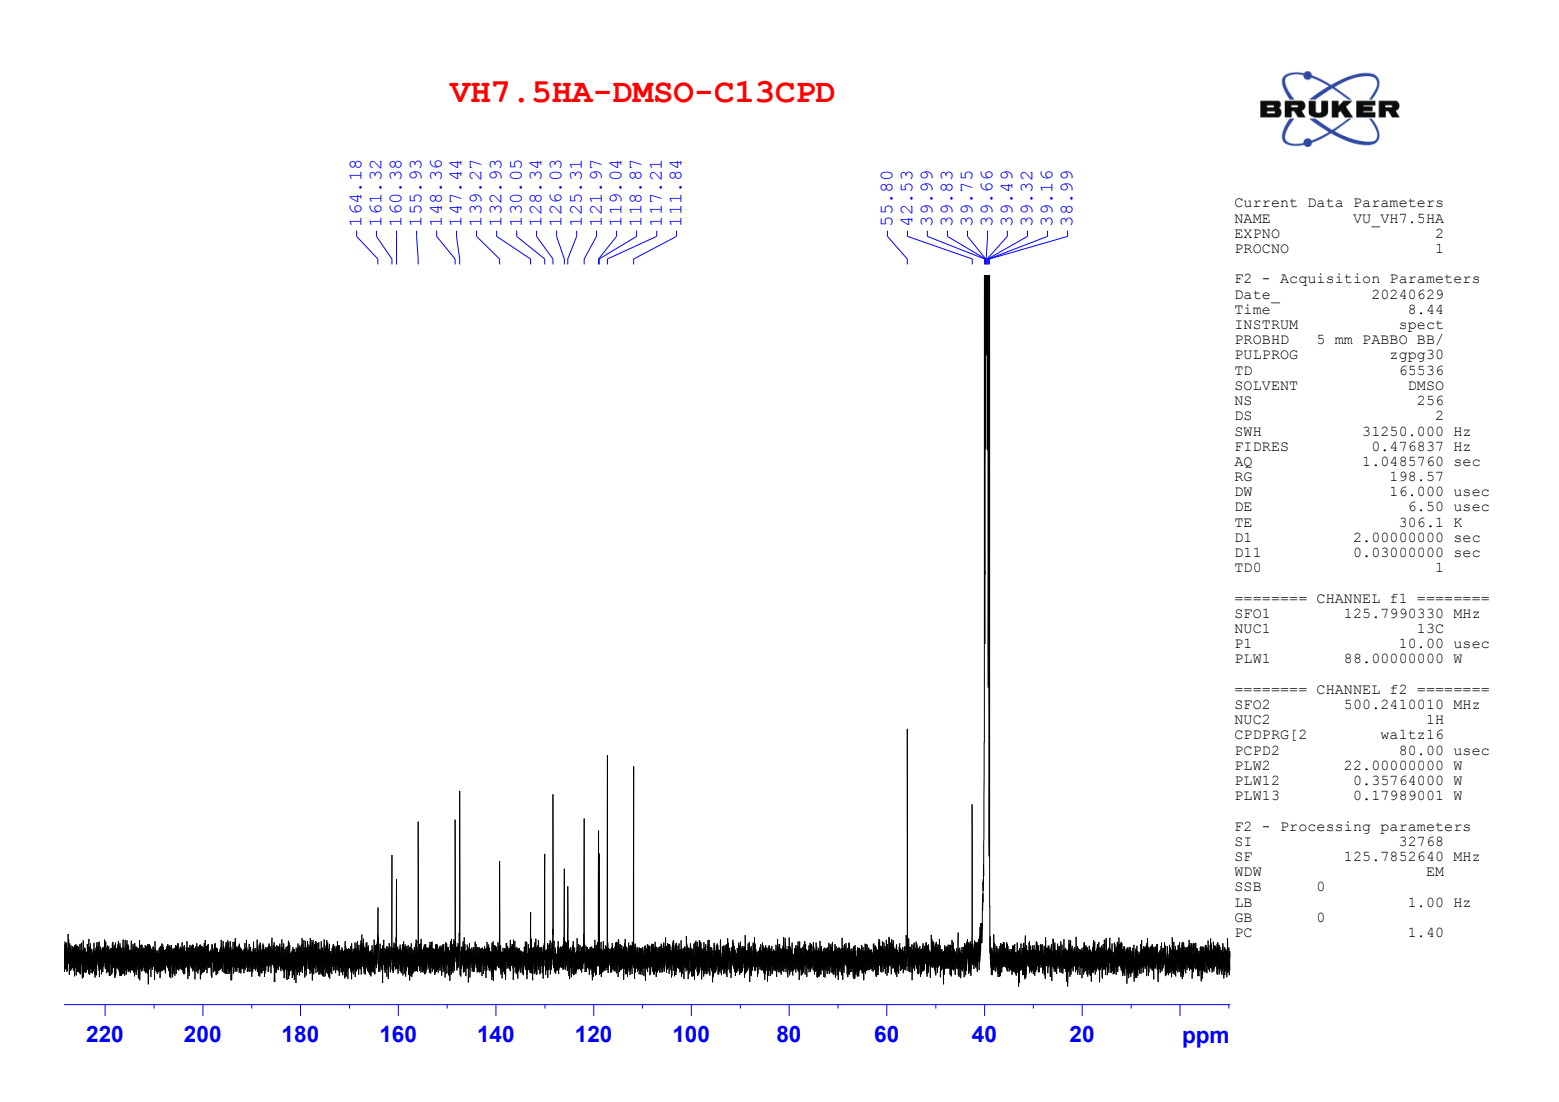


**Figure S95. 13C NMR of compound 8g
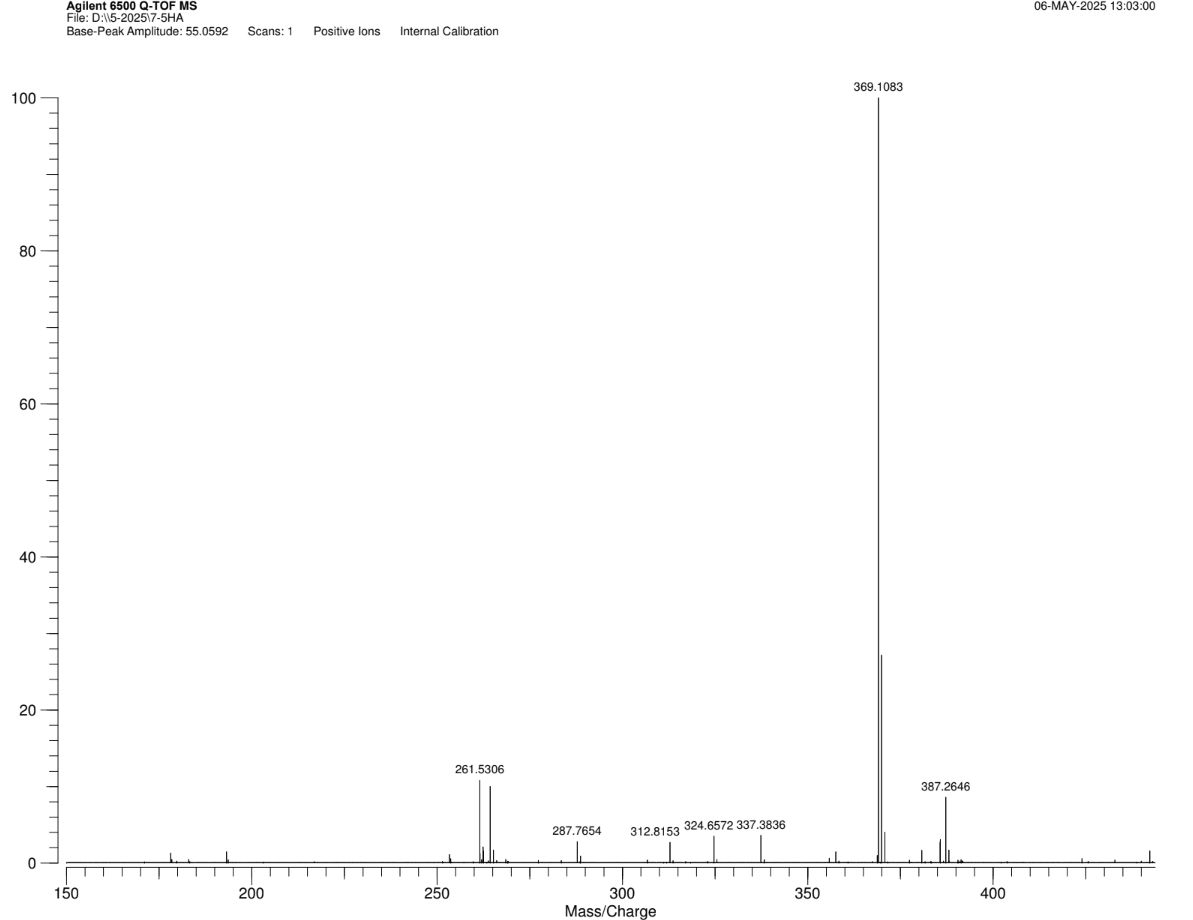
**
